# Supplementary material for: The chemistry of phosphirane-substituted phosphinidene complexes
Source: Royal Society of Chemistry journal article supplement (doi:10.1039/d0cc04501b), 2020-01-01
Supplement: d0cc04501b1.pdf [file d0cc04501b1.pdf]

## Supporting Information

### **The chemistry of phosphirane-substituted phosphinidene complexes**

Min Wang, Tingting Yang, Rongqiang Tian,\* Donghui Wei,\* Zheng Duan,\* François Mathey

*College of Chemistry, Green Catalysis Center, International Phosphorus Laboratory,  
International Joint Research Laboratory for Functional Organophosphorus Materials of Henan  
Province, Zhengzhou University, Zhengzhou 450001, P. R. China*

\*E-mail: tianrq@zzu.edu.cn (R. Tian).

\*E-mail: donghuiwei@zzu.edu.cn (D. wei).

\*E-mail: duanzheng@zzu.edu.cn (Z. Duan).

## Table of Contents

|                                                         |     |
|---------------------------------------------------------|-----|
| General information .....                               | S3  |
| Experimental Procedures and Characterization Data ..... | S3  |
| X-ray Diffraction Data .....                            | S8  |
| DFT calculations .....                                  | S22 |
| NMR spectra .....                                       | S52 |

## General information

All reactions were performed under nitrogen using solvents dried by standard methods except for special statement. Tetrahydrofuran (THF), toluene and ether were dried with sodium and distilled before use. NMR spectra were obtained using Bruker AV300 spectrometer. All spectra were recorded in  $\text{CDCl}_3$ . All coupling constants ( $J$  values) were reported in hertz (Hz). Chemical shifts were expressed in parts per million (ppm) downfield from internal TMS ( $^1\text{H}$ ). HRMS spectra were obtained on an Agilent 1290-6540 UHPLC Q-T of HRMS spectrometer. Element analyses were performed on a Thermo Flash EA 1112 automatic element analyzer. X-ray crystallographic analyses were performed on an Oxford diffraction Gemini E diffractometer. Silica gel (200-300 mesh) was used for the chromatographic separations. All commercially available reagents were used without further purification. All new compounds were synthetic in small scale, and were purified by column chromatography. The purities of the new compounds are acceptable according to NMR spectra analysis.

## Experimental Procedures and Characterization Data

### The preparation of **1a** and **1b**

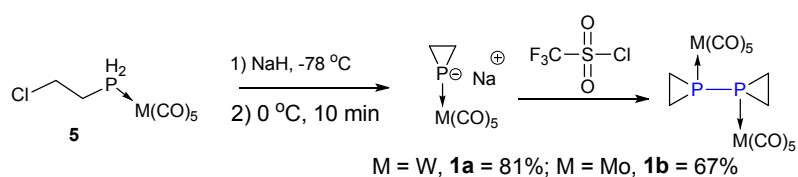

NaH (160 mg, 4 mmol, 60% dispersion in mineral oil) was added to the solution of 2-chloroethylphosphine  $\text{M}(\text{CO})_5$  complex **5** (1 mmol) in THF (20 mL) at  $-78\text{ }^\circ\text{C}$ . Then the mixture was stirred vigorously in an ice bath for 10 min, produced phosphiranide complex. Trifluoromethanesulfonyl chloride (4 mmol, 426  $\mu\text{L}$ ) was added to the solution of phosphiranide complex at  $-50\text{ }^\circ\text{C}$ . The solution was warmed

slowly to r.t. The solvent was removed by rotary evaporation. Purification was performed via column chromatography on silica using 10/1 petroleum ether /dichloromethane, to give a light green solid **1a** (311 mg, 81%), whiteness solid **1b** (200 mg, 67%)

**1a:**  $^{31}\text{P}$  NMR ( $\text{CDCl}_3$ ):  $\delta$  -193.1 ( $J_{\text{PW1}} = 153.1$  Hz,  $J_{\text{PW2}} = 99.6$  Hz),  $^1\text{H}$  NMR ( $\text{CDCl}_3$ ):  $\delta$  1.57-1.61 (m, 4H,  $\text{CH}_2$ ), 1.74-1.76 (m, 4H,  $\text{CH}_2$ ).  $^{13}\text{C}$  NMR ( $\text{CDCl}_3$ ):  $\delta$  13.3 (t,  $J = 9.8$  Hz,  $\text{CH}_2$ ), 194.5 (t,  $J = 2.3$  Hz CO *cis*), 195.7 (t,  $J = 13.6$  Hz, CO *trans*). HRMS:  $m/z$  calcd for  $\text{C}_{14}\text{H}_9\text{O}_{10}\text{P}_2\text{W}_2$  [ $\text{M}+\text{H}$ ] $^+$  766.8684, found 766.8680.

**1b:**  $^{31}\text{P}$  NMR ( $\text{CDCl}_3$ ):  $\delta$  -171.1.  $^1\text{H}$  NMR ( $\text{CDCl}_3$ ):  $\delta$  1.39-1.48 (m, 4H,  $\text{CH}_2$ ), 1.63-1.68 (m, 4H,  $\text{CH}_2$ ).  $^{13}\text{C}$  NMR ( $\text{CDCl}_3$ ):  $\delta$  11.8 (t,  $J = 7.6$  Hz,  $\text{CH}_2$ ), 203.68 (t,  $J = 9.1$  Hz, CO *cis*), 207.08 (t,  $J = 18.9$  Hz, CO *trans*). Anal. Calcd for  $\text{C}_{14}\text{H}_8\text{Mo}_2\text{O}_{10}\text{P}_2$ : C, 28.50; H, 1.37. Found: C, 28.25; H, 1.584.

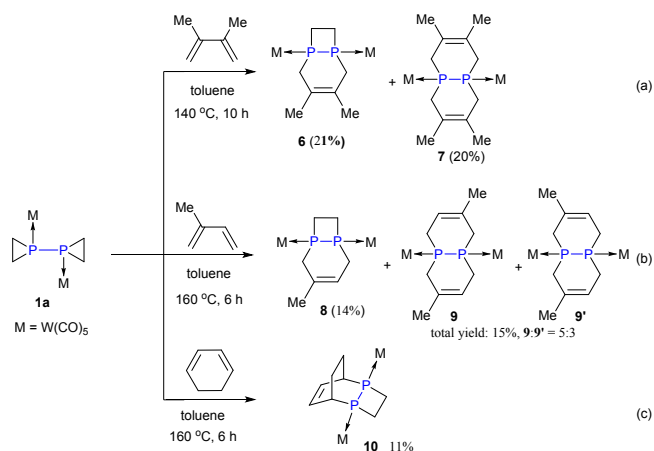

General procedure for the thermolysis of 1,1'-biphosphirane  $\text{W}(\text{CO})_5$  complex **1a** with conjugated dienes.

A solution of biphosphirane  $\text{W}(\text{CO})_5$  complex **1a** (0.5 mmol) and conjugated diene (2 mmol) in toluene (10 mL) was stirred at 140 °C for 10 h (2,3-dimethyl-1,3-butadiene) or 160 °C for 6 h (2-methyl-1,3-butadiene and 1,3-cyclohexadiene) in a heavy wall pressure tube. The solution was cooled to room temperature. All volatile were

removed by rotary evaporation. The products were purified by chromatography on silica gel (petroleum ether/dichloromethane: 5/1). Single crystals of **6** and **7** suitable for X-ray analysis were grown from a mixture of *n*-hexane and ethyl acetate.

**6**: yellow solid, Yield: 86 mg (21 %).  $^{31}\text{P}$  NMR ( $\text{CDCl}_3$ ):  $\delta$  21.33 ( $J_{\text{PW1}} = 267.3$  Hz,  $J_{\text{PW2}} = 196.8$  Hz),  $^1\text{H}$  NMR ( $\text{CDCl}_3$ ):  $\delta$  2.05 (s, 6H,  $\text{CH}_3$ ), 2.58-2.64 (m, 2H,  $\text{CH}_2$ ), 2.82-2.93 (m, 4H,  $\text{CH}_2$ ), 3.07-3.15 (m, 2H,  $\text{CH}_2$ ).  $^{13}\text{C}$  NMR ( $\text{CDCl}_3$ ):  $\delta$  22.5 (s,  $\text{CH}_3$ ), 27.8 (dd,  $J = 13.4, 12.2$  Hz), 41.2 (s,  $\text{CH}_2$ ), 128.4 (t,  $J = 6.0$ , =C), 195.8 (t,  $J = 2.2$  Hz, CO *cis*), 198.3 (t,  $J = 9.8$  Hz, CO *trans*). HRMS:  $m/z$  calcd for  $\text{C}_{18}\text{H}_{15}\text{O}_{10}\text{P}_2\text{W}_2$   $[\text{M}+\text{H}]^+$  820.9154, found 820.9152.

**7**: yellow solid, Yield: 87 mg (20 %).  $^{31}\text{P}$  NMR ( $\text{CDCl}_3$ ):  $\delta$  -27.45 ( $J_{\text{PW1}} = 157.9$  Hz,  $J_{\text{PW2}} = 94.5$  Hz).  $^1\text{H}$  NMR ( $\text{CDCl}_3$ ):  $\delta$  1.86 (s, 12H,  $\text{CH}_3$ ), 2.70 (d,  $J = 15.0$  Hz, 4H,  $\text{CH}_2$ ), 2.96 (d,  $J = 9.0$  Hz, 4H,  $\text{CH}_2$ ).  $^{13}\text{C}$  NMR ( $\text{CDCl}_3$ ):  $\delta$  22.0 (s,  $\text{CH}_3$ ), 36.4 (s,  $\text{CH}_2$ ), 125.5 (s, =C), 196.6 (t,  $J = 3.0$  Hz, CO *cis*), 197.5 (d,  $J = 10.5$  Hz, CO *trans*). HRMS:  $m/z$  calcd for  $\text{C}_{22}\text{H}_{21}\text{O}_{10}\text{P}_2\text{W}_2$   $[\text{M}+\text{H}]^+$  874.9623, found 874.9628.

**8**: brown solid, Yield: 56 mg (14 %).  $^{31}\text{P}$  NMR ( $\text{CDCl}_3$ ):  $\delta$  20.18 (d,  $J_{\text{pp}} = 41.0$  Hz,  $J_{\text{PW1}} = 269.7$ ,  $J_{\text{PW2}} = 183.5$ ), 23.81 (d,  $J_{\text{pp}} = 41.3$  Hz,  $J_{\text{PW1}} = 269.7$ ,  $J_{\text{PW2}} = 184.7$ ).  $^1\text{H}$  NMR ( $\text{CDCl}_3$ ):  $\delta$  2.08 (d,  $J = 1.6$  Hz, 3H,  $\text{CH}_3$ ), 2.58-2.81 (m, 2H,  $\text{CH}_2$ ), 2.84-2.95 (m, 4H,  $\text{CH}_2$ ), 3.02-3.18 (m, 2H,  $\text{CH}_2$ ), 6.05 (bs, 1H, =CH).  $^{13}\text{C}$  NMR ( $\text{CDCl}_3$ ):  $\delta$  26.4 (t,  $J = 2.4$  Hz,  $\text{CH}_3$ ), 27.3 (dd,  $J = 30.1$  Hz,  $J = 3.8$  Hz,  $\text{CH}_2$ ), 28.3 (dd,  $J = 30.0$  Hz,  $J = 4.5$  Hz,  $\text{CH}_2$ ), 34.3 (t,  $J = 3.3$  Hz,  $\text{CH}_2$ ), 39.3 (t,  $J = 2.1$  Hz,  $\text{CH}_2$ ), 121.0 (t,  $J = 8.5$  Hz, =CH), 137.4-137.6 (m, =C), 195.8 (tt,  $J = 6.75$  Hz,  $J = 1.5$  Hz CO *cis*), 198.0-198.7 (m, CO *trans*). HRMS:  $m/z$  calcd for  $\text{C}_{17}\text{H}_{11}\text{O}_{10}\text{P}_2\text{W}_2$   $[\text{M}-\text{H}]^-$  804.8852, found 804.8867.

**9** and **9'** were isolated as a mixture: light pink solid, Yield: 64 mg (15 %).  $^{31}\text{P}$  NMR ( $\text{CDCl}_3$ ): **9**,  $\delta$  -52.08 ( $J_{\text{PW1}} = 162.1$  Hz,  $J_{\text{PW2}} = 82.2$  Hz). **9'**,  $\delta$  -55.86 (d,  $J_{\text{pp}} = 151.3$  Hz), - 48.84 (d,  $J_{\text{pp}} = 151.3$  Hz).  $^1\text{H}$  NMR ( $\text{CDCl}_3$ ): 1.86 (s, 6H,  $\text{CH}_3$ ), 2.62-2.77 (m, 4H,  $\text{CH}_2$ ), 2.91-3.07 (m, 4H,  $\text{CH}_2$ ), 5.61 (d,  $J = 16.6$  Hz, 1H, =CH).  $^{13}\text{C}$  NMR

(CDCl<sub>3</sub>): **9**,  $\delta$  27.02 (d,  $J = 2.7$  Hz, CH<sub>3</sub>), 28.1 (*pseudo-t*,  $J = 8.0$  Hz, CH<sub>2</sub>), 32.0 (*pseudo-t*,  $J = 7.6$  Hz, CH<sub>2</sub>), 117.3 (d,  $J = 2.3$  Hz, CH), 131.4 (d,  $J = 1.3$  Hz, C), 195.9 (d,  $J = 2.6$  Hz, CO *cis*), 197.2 (d,  $J = 13.2$  Hz, CO *trans*). **9'**, 26.95 (d,  $J = 2.0$  Hz, CH<sub>3</sub>), 27.5 (d,  $J = 15.8$  Hz, CH<sub>2</sub>), 32.6 (d,  $J = 15.4$  Hz, CH<sub>2</sub>), 117.5 (d,  $J = 6.8$  Hz, CH), 131.1 (dd,  $J = 8.5$  Hz,  $J = 5.7$  Hz, C), 195.8 (d,  $J = 2.6$  Hz, CO *cis*), 196.9 (d,  $J = 20.6$  Hz, CO *trans*). HRMS:  $m/z$  calcd for C<sub>20</sub>H<sub>15</sub>O<sub>10</sub>P<sub>2</sub>W<sub>2</sub> [M-H]<sup>-</sup> 844.9165, found 844.9168.

**10**: yellow solid, Yield: 45 mg (11 %). <sup>31</sup>P NMR (CDCl<sub>3</sub>):  $\delta$  31.01 ( $J_{PW1} = 292.8$  Hz,  $J_{PW2} = 183.5$  Hz). <sup>1</sup>H NMR (CDCl<sub>3</sub>):  $\delta$  1.77-1.91 (m, 4H, CH<sub>2</sub>), 2.64-2.78 (m, 4H, CH<sub>2</sub>), 3.53 (s, 2H, CH), 6.79-6.82 (m, 2H, CH). <sup>13</sup>C NMR (CDCl<sub>3</sub>):  $\delta$  21.5 (t,  $J = 5.3$  Hz, CH<sub>2</sub>), 29.6 (t,  $J = 10.6$  Hz, CH<sub>2</sub>), 38.8 (s, CH), 132.5 (s, CH), 195.6 (t,  $J = 2.3$  Hz, CO *cis*), 197.9 (t,  $J = 9.8$  Hz, CO *trans*). HRMS:  $m/z$  calcd for C<sub>18</sub>H<sub>13</sub>O<sub>10</sub>P<sub>2</sub>W<sub>2</sub> [M+H]<sup>+</sup> 818.8997, found 818.9005.

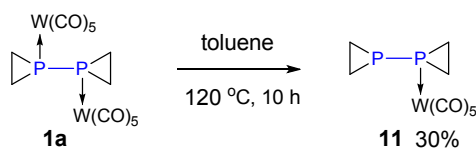

A solution of biphenyl diphosphine W(CO)<sub>5</sub> complex **1a** (383 mg, 0.5 mmol) in toluene (10 mL) was stirred at 120 °C for 10 h in a heavy wall pressure tube. The solution was cooled to room temperature. The solvent was removed by rotary evaporation. The products were purified by chromatography on silica gel (petroleum ether / dichloromethane: 15 / 1), to give **11** as a yellow oil (66 mg, 30%).

**11**: <sup>31</sup>P NMR (CDCl<sub>3</sub>):  $\delta$  -278.3 (d,  $J_{pp} = 277.1$ ), -205.7 (d,  $J_{pp} = 277.1$ ,  $J_{pw} = 219.0$ ). <sup>1</sup>H NMR (CDCl<sub>3</sub>):  $\delta$  1.21-1.33 (m, 4H, CH<sub>2</sub>), 1.38-1.46 (m, 2H, CH<sub>2</sub>), 1.58-1.65 (m, 2H, CH<sub>2</sub>). <sup>13</sup>C NMR (CDCl<sub>3</sub>):  $\delta$  9.2 (d,  $J = 42.3$  Hz, CH<sub>2</sub>), 11.1 (dd,  $J = 15.0$  Hz,  $J = 12.8$  Hz, CH<sub>2</sub>), 195.4 (d,  $J = 7.3$  Hz, CO *cis*), 196.8 (d,  $J = 31.3$  Hz, CO *trans*).

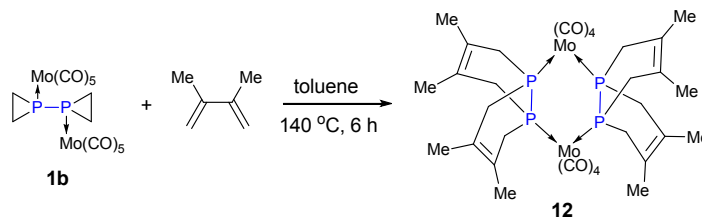

A solution of biposphirane Mo(CO)<sub>5</sub> complex **1b** (297 mg, 0.5 mmol) and 2,3-dimethyl-1,3-butadiene (0.23 mL, 2 mmol) in toluene (10 mL) was stirred at 140 °C for 6 h in a heavy wall pressure tube. The solution was cooled to room temperature. All volatiles were removed by rotary evaporation. The product was purified by chromatography on silica gel (petroleum ether / dichloromethane: 5 / 1). Single crystal of **12** suitable for X-ray analysis was grown from a mixture of n-hexane and ethyl acetate.

**12**: yellow solid, Yield: 96 mg (22 %). <sup>31</sup>P NMR (CDCl<sub>3</sub>): δ -18.96. <sup>1</sup>H NMR (CDCl<sub>3</sub>): δ 1.86 (s, 24H, CH<sub>3</sub>), 2.47 (d, *J* = 14.1 Hz, CH<sub>2</sub>, 8H), 2.70 (d, *J* = 14.1 Hz, CH<sub>2</sub>, 8H). <sup>13</sup>C NMR (CDCl<sub>3</sub>): δ 21.4 (s, CH<sub>3</sub>), 35.7 (s, CH<sub>2</sub>), 126.2 (s, =C), 207.8 - 208.1 (m, CO *cis*), 213.1-213.3 (m, CO *trans*). HRMS: *m/z* calcd for C<sub>32</sub>H<sub>41</sub>Mo<sub>2</sub>O<sub>8</sub>P<sub>4</sub> [M+H]<sup>+</sup> 872.9855, found 872.9845.

## X-ray Diffraction Data

### X-ray crystallographic data of **6**

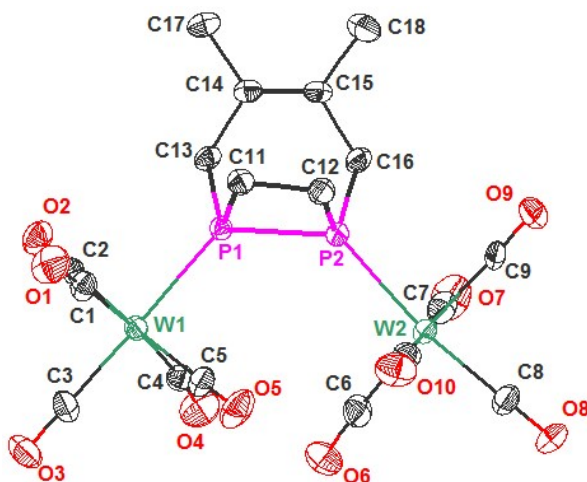

Figure S1 X-ray structure of **6**

Table S1 Crystal data and structure refinement for **6**.

|                                      |                                                                               |
|--------------------------------------|-------------------------------------------------------------------------------|
| Identification code                  | <b>6</b>                                                                      |
| Empirical formula                    | C <sub>18</sub> H <sub>14</sub> O <sub>10</sub> P <sub>2</sub> W <sub>2</sub> |
| Formula weight                       | 819.93                                                                        |
| Temperature/K                        | 293(2)                                                                        |
| Crystal system                       | monoclinic                                                                    |
| Space group                          | P2 <sub>1</sub> /c                                                            |
| a/Å                                  | 25.4396(4)                                                                    |
| b/Å                                  | 10.82292(16)                                                                  |
| c/Å                                  | 18.9442(3)                                                                    |
| α/°                                  | 90                                                                            |
| β/°                                  | 111.4853(19)                                                                  |
| γ/°                                  | 90                                                                            |
| Volume/Å <sup>3</sup>                | 4853.46(15)                                                                   |
| Z                                    | 8                                                                             |
| ρ <sub>calc</sub> /g/cm <sup>3</sup> | 2.244                                                                         |
| μ/mm <sup>-1</sup>                   | 18.960                                                                        |
| F(000)                               | 3040.0                                                                        |
| Crystal size/mm <sup>3</sup>         | 0.3321 × 0.1992 × 0.1181                                                      |
| Radiation                            | CuKα (λ = 1.54184)                                                            |
| 2θ range for data collection/°       | 7.47 to 134.142                                                               |



|                                             |                                                               |
|---------------------------------------------|---------------------------------------------------------------|
| Index ranges                                | -30 ≤ h ≤ 30, -7 ≤ k ≤ 12, -22 ≤ l ≤ 22                       |
| Reflections collected                       | 20747                                                         |
| Independent reflections                     | 8648 [R <sub>int</sub> = 0.0536, R <sub>sigma</sub> = 0.0592] |
| Data/restraints/parameters                  | 8648/0/581                                                    |
| Goodness-of-fit on F <sup>2</sup>           | 1.042                                                         |
| Final R indexes [I ≥ 2σ (I)]                | R <sub>1</sub> = 0.0412, wR <sub>2</sub> = 0.0989             |
| Final R indexes [all data]                  | R <sub>1</sub> = 0.0525, wR <sub>2</sub> = 0.1085             |
| Largest diff. peak/hole / e Å <sup>-3</sup> | 1.19/-1.09                                                    |

**Table S2 Bond Lengths for 6**

| Atom | Atom | Length/Å  | Atom | Atom | Length/Å  |
|------|------|-----------|------|------|-----------|
| C1   | O1   | 1.128(12) | C1'  | O1'  | 1.134(12) |
| C1   | W1   | 2.040(10) | C1'  | W1'  | 2.038(10) |
| C2   | O2   | 1.136(11) | C2'  | O2'  | 1.129(12) |
| C2   | W1   | 2.034(9)  | C2'  | W1'  | 2.052(10) |
| C3   | O3   | 1.154(11) | C3'  | O3'  | 1.116(11) |
| C3   | W1   | 1.992(9)  | C3'  | W1'  | 2.015(9)  |
| C4   | O4   | 1.119(11) | C4'  | O4'  | 1.123(12) |
| C4   | W1   | 2.059(9)  | C4'  | W1'  | 2.047(9)  |
| C5   | O5   | 1.110(11) | C5'  | O5'  | 1.127(13) |
| C5   | W1   | 2.059(9)  | C5'  | W1'  | 2.035(10) |
| C6   | O6   | 1.134(12) | C6'  | O6'  | 1.118(14) |
| C6   | W2   | 2.050(10) | C6'  | W2'  | 2.057(13) |
| C7   | O7   | 1.102(13) | C7'  | O7'  | 1.116(13) |
| C7   | W2   | 2.067(11) | C7'  | W2'  | 2.061(11) |
| C8   | O8   | 1.130(11) | C8'  | O8'  | 1.150(13) |
| C8   | W2   | 2.008(10) | C8'  | W2'  | 1.990(10) |
| C9   | O9   | 1.112(11) | C9'  | O9'  | 1.139(13) |
| C9   | W2   | 2.047(9)  | C9'  | W2'  | 2.013(11) |
| C10  | O10  | 1.111(12) | C10' | O10' | 1.117(15) |
| C10  | W2   | 2.046(10) | C10' | W2'  | 2.037(12) |
| C11  | C12  | 1.566(11) | C11' | C12' | 1.551(13) |
| C11  | P1   | 1.864(8)  | C11' | P1'  | 1.877(9)  |
| C12  | P2   | 1.850(8)  | C12' | P2'  | 1.858(9)  |
| C13  | C14  | 1.494(11) | C13' | C14' | 1.516(12) |
| C13  | P1   | 1.850(8)  | C13' | P1'  | 1.837(8)  |
| C14  | C15  | 1.353(13) | C14' | C15' | 1.324(13) |

|     |     |           |      |      |           |
|-----|-----|-----------|------|------|-----------|
| C14 | C17 | 1.510(12) | C14' | C17' | 1.517(13) |
| C15 | C16 | 1.512(12) | C15' | C16' | 1.501(14) |
| C15 | C18 | 1.517(13) | C15' | C18' | 1.511(14) |
| C16 | P2  | 1.856(9)  | C16' | P2'  | 1.853(10) |
| P1  | P2  | 2.225(3)  | P1'  | P2'  | 2.225(3)  |
| P1  | W1  | 2.498(2)  | P1'  | W1'  | 2.472(2)  |
| P2  | W2  | 2.495(2)  | P2'  | W2'  | 2.493(2)  |

**Table S3 Bond Angles for 6**

| Atom | Atom | Atom | Angle/°    | Atom | Atom | Atom | Angle/°    |
|------|------|------|------------|------|------|------|------------|
| O1   | C1   | W1   | 175.5(10)  | O1'  | C1'  | W1'  | 179.1(11)  |
| O2   | C2   | W1   | 177.1(8)   | O2'  | C2'  | W1'  | 178.1(9)   |
| O3   | C3   | W1   | 178.5(9)   | O3'  | C3'  | W1'  | 178.7(10)  |
| O4   | C4   | W1   | 174.2(9)   | O4'  | C4'  | W1'  | 178.1(10)  |
| O5   | C5   | W1   | 178.1(10)  | O5'  | C5'  | W1'  | 177.6(13)  |
| O6   | C6   | W2   | 175.3(10)  | O6'  | C6'  | W2'  | 176.2(11)  |
| O7   | C7   | W2   | 178.0(12)  | O7'  | C7'  | W2'  | 178.5(11)  |
| O8   | C8   | W2   | 179.1(11)  | O8'  | C8'  | W2'  | 179.5(14)  |
| O9   | C9   | W2   | 179.5(9)   | O9'  | C9'  | W2'  | 179.6(12)  |
| O10  | C10  | W2   | 178.1(9)   | O10' | C10' | W2'  | 178.5(16)  |
| C12  | C11  | P1   | 99.6(5)    | C12' | C11' | P1'  | 99.2(6)    |
| C11  | C12  | P2   | 100.7(5)   | C11' | C12' | P2'  | 101.5(6)   |
| C14  | C13  | P1   | 115.7(6)   | C14' | C13' | P1'  | 116.8(6)   |
| C13  | C14  | C17  | 115.8(8)   | C13' | C14' | C17' | 116.0(8)   |
| C15  | C14  | C13  | 120.5(8)   | C15' | C14' | C13' | 120.2(9)   |
| C15  | C14  | C17  | 123.7(8)   | C15' | C14' | C17' | 123.8(9)   |
| C14  | C15  | C16  | 120.3(8)   | C14' | C15' | C16' | 121.0(9)   |
| C14  | C15  | C18  | 125.4(9)   | C14' | C15' | C18' | 124.4(10)  |
| C16  | C15  | C18  | 114.3(9)   | C16' | C15' | C18' | 114.5(9)   |
| C15  | C16  | P2   | 117.2(6)   | C15' | C16' | P2'  | 115.5(7)   |
| C11  | P1   | P2   | 79.8(3)    | C11' | P1'  | P2'  | 79.9(3)    |
| C11  | P1   | W1   | 119.4(3)   | C11' | P1'  | W1'  | 124.8(3)   |
| C13  | P1   | C11  | 105.9(4)   | C13' | P1'  | C11' | 105.0(4)   |
| C13  | P1   | P2   | 100.2(3)   | C13' | P1'  | P2'  | 101.0(3)   |
| C13  | P1   | W1   | 117.3(3)   | C13' | P1'  | W1'  | 115.7(3)   |
| P2   | P1   | W1   | 127.27(10) | P2'  | P1'  | W1'  | 123.62(11) |

|     |    |     |            |      |     |      |            |
|-----|----|-----|------------|------|-----|------|------------|
| C12 | P2 | C16 | 104.3(4)   | C12' | P2' | P1'  | 79.2(3)    |
| C12 | P2 | P1  | 79.7(3)    | C12' | P2' | W2'  | 118.3(3)   |
| C12 | P2 | W2  | 119.4(3)   | C16' | P2' | C12' | 106.0(5)   |
| C16 | P2 | P1  | 100.0(3)   | C16' | P2' | P1'  | 98.8(3)    |
| C16 | P2 | W2  | 112.5(3)   | C16' | P2' | W2'  | 114.8(3)   |
| P1  | P2 | W2  | 134.53(11) | P1'  | P2' | W2'  | 132.99(12) |
| C1  | W1 | C4  | 174.2(4)   | C1'  | W1' | C2'  | 86.4(4)    |
| C1  | W1 | C5  | 89.8(4)    | C1'  | W1' | C4'  | 175.8(4)   |
| C1  | W1 | P1  | 90.7(3)    | C1'  | W1' | P1'  | 89.9(3)    |
| C2  | W1 | C1  | 89.0(4)    | C2'  | W1' | P1'  | 91.3(3)    |
| C2  | W1 | C4  | 89.9(4)    | C3'  | W1' | C1'  | 90.0(4)    |
| C2  | W1 | C5  | 176.9(4)   | C3'  | W1' | C2'  | 89.3(4)    |
| C2  | W1 | P1  | 88.0(2)    | C3'  | W1' | C4'  | 90.3(4)    |
| C3  | W1 | C1  | 86.9(4)    | C3'  | W1' | C5'  | 92.6(4)    |
| C3  | W1 | C2  | 91.8(4)    | C3'  | W1' | P1'  | 179.4(3)   |
| C3  | W1 | C4  | 87.4(4)    | C4'  | W1' | C2'  | 89.4(4)    |
| C3  | W1 | C5  | 91.0(4)    | C4'  | W1' | P1'  | 89.8(3)    |
| C3  | W1 | P1  | 177.6(3)   | C5'  | W1' | C1'  | 95.0(5)    |
| C4  | W1 | C5  | 91.5(4)    | C5'  | W1' | C2'  | 177.6(4)   |
| C4  | W1 | P1  | 95.0(3)    | C5'  | W1' | C4'  | 89.2(5)    |
| C5  | W1 | P1  | 89.2(3)    | C5'  | W1' | P1'  | 86.8(3)    |
| C6  | W2 | C7  | 89.9(4)    | C6'  | W2' | C7'  | 91.2(5)    |
| C6  | W2 | P2  | 98.7(3)    | C6'  | W2' | P2'  | 98.0(3)    |
| C7  | W2 | P2  | 90.2(3)    | C7'  | W2' | P2'  | 89.0(3)    |
| C8  | W2 | C6  | 89.6(4)    | C8'  | W2' | C6'  | 88.7(5)    |
| C8  | W2 | C7  | 89.7(4)    | C8'  | W2' | C7'  | 90.7(5)    |
| C8  | W2 | C9  | 88.2(4)    | C8'  | W2' | C9'  | 89.0(5)    |
| C8  | W2 | C10 | 90.6(4)    | C8'  | W2' | C10' | 90.3(6)    |
| C8  | W2 | P2  | 171.7(3)   | C8'  | W2' | P2'  | 173.3(4)   |
| C9  | W2 | C6  | 177.8(4)   | C9'  | W2' | C6'  | 177.3(4)   |
| C9  | W2 | C7  | 89.5(4)    | C9'  | W2' | C7'  | 90.1(5)    |
| C9  | W2 | P2  | 83.4(2)    | C9'  | W2' | C10' | 89.1(5)    |
| C10 | W2 | C6  | 89.4(4)    | C9'  | W2' | P2'  | 84.3(3)    |
| C10 | W2 | C7  | 179.3(4)   | C10' | W2' | C6'  | 89.6(6)    |
| C10 | W2 | C9  | 91.2(4)    | C10' | W2' | C7'  | 178.7(5)   |
| C10 | W2 | P2  | 89.7(3)    | C10' | W2' | P2'  | 89.9(4)    |

## X-ray crystallographic data of 7

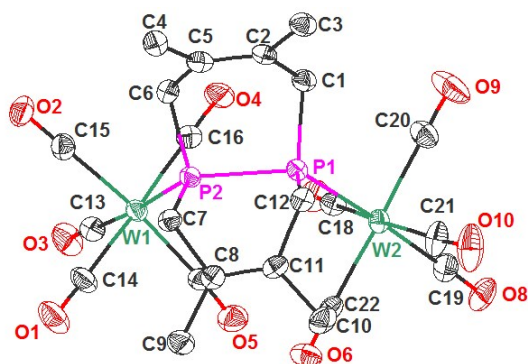

Figure S2 X-ray structure of 7

Table S4 Crystal data and structure refinement for 7.

|                                        |                                                                               |
|----------------------------------------|-------------------------------------------------------------------------------|
| Identification code                    | 7                                                                             |
| Empirical formula                      | C <sub>22</sub> H <sub>20</sub> O <sub>10</sub> P <sub>2</sub> W <sub>2</sub> |
| Formula weight                         | 874.02                                                                        |
| Temperature/K                          | 200.00(10)                                                                    |
| Crystal system                         | monoclinic                                                                    |
| Space group                            | P2 <sub>1</sub> /n                                                            |
| a/Å                                    | 10.8615(2)                                                                    |
| b/Å                                    | 14.1665(2)                                                                    |
| c/Å                                    | 17.7114(3)                                                                    |
| $\alpha$ /°                            | 90                                                                            |
| $\beta$ /°                             | 90.165(2)                                                                     |
| $\gamma$ /°                            | 90                                                                            |
| Volume/Å <sup>3</sup>                  | 2725.23(8)                                                                    |
| Z                                      | 4                                                                             |
| $\rho_{\text{calc}}$ /cm <sup>3</sup>  | 2.130                                                                         |
| $\mu$ /mm <sup>-1</sup>                | 16.937                                                                        |
| F(000)                                 | 1640.0                                                                        |
| Crystal size/mm <sup>3</sup>           | 0.4 × 0.3 × 0.2                                                               |
| Radiation                              | CuK $\alpha$ ( $\lambda$ = 1.54178)                                           |
| 2 $\theta$ range for data collection/° | 7.992 to 146.786                                                              |
| Index ranges                           | -13 ≤ h ≤ 13, -17 ≤ k ≤ 13, -21 ≤ l ≤ 21                                      |
| Reflections collected                  | 22522                                                                         |
| Independent reflections                | 5377 [R <sub>int</sub> = 0.0586, R <sub>sigma</sub> = 0.0364]                 |
| Data/restraints/parameters             | 5377/0/329                                                                    |

Goodness-of-fit on  $F^2$  1.048  
 Final R indexes [ $I \geq 2\sigma(I)$ ]  $R_1 = 0.0551$ ,  $wR_2 = 0.1493$   
 Final R indexes [all data]  $R_1 = 0.0585$ ,  $wR_2 = 0.1567$   
 Largest diff. peak/hole /  $e \text{ \AA}^{-3}$  2.33/-1.74

---

**Table S5 Bond Lengths for 7.**

| Atom | Atom | Length/Å   | Atom | Atom | Length/Å  |
|------|------|------------|------|------|-----------|
| W1   | P2   | 2.5243(15) | O3   | C13  | 1.137(9)  |
| W1   | C13  | 2.010(8)   | O4   | C16  | 1.125(8)  |
| W1   | C14  | 2.058(7)   | O5   | C17  | 1.140(9)  |
| W1   | C15  | 2.047(8)   | O6   | C22  | 1.125(8)  |
| W1   | C16  | 2.037(7)   | O7   | C18  | 1.118(8)  |
| W1   | C17  | 2.040(7)   | O8   | C19  | 1.126(9)  |
| W2   | P1   | 2.5213(15) | O9   | C20  | 1.119(9)  |
| W2   | C18  | 2.068(7)   | O10  | C21  | 1.120(10) |
| W2   | C19  | 2.016(8)   | C1   | C2   | 1.494(9)  |
| W2   | C20  | 2.054(8)   | C2   | C3   | 1.523(8)  |
| W2   | C21  | 2.044(8)   | C2   | C5   | 1.355(9)  |
| W2   | C22  | 2.060(7)   | C4   | C5   | 1.502(10) |
| P1   | P2   | 2.237(2)   | C5   | C6   | 1.488(9)  |
| P1   | C1   | 1.860(6)   | C7   | C8   | 1.497(8)  |
| P1   | C12  | 1.849(6)   | C8   | C9   | 1.499(9)  |
| P2   | C6   | 1.862(7)   | C8   | C11  | 1.346(9)  |
| P2   | C7   | 1.864(7)   | C10  | C11  | 1.517(8)  |
| O1   | C14  | 1.119(9)   | C11  | C12  | 1.505(9)  |
| O2   | C15  | 1.135(9)   |      |      |           |

**Table S6 Bond Angles for 7**

| Atom | Atom | Atom | Angle/°  | Atom | Atom | Atom | Angle/°   |
|------|------|------|----------|------|------|------|-----------|
| C13  | W1   | P2   | 175.0(2) | C12  | P1   | P2   | 98.1(2)   |
| C13  | W1   | C14  | 92.6(3)  | C12  | P1   | C1   | 103.5(3)  |
| C13  | W1   | C15  | 87.3(3)  | P1   | P2   | W1   | 123.15(8) |
| C13  | W1   | C16  | 92.5(3)  | C6   | P2   | W1   | 109.6(2)  |
| C13  | W1   | C17  | 83.6(3)  | C6   | P2   | P1   | 99.3(2)   |
| C14  | W1   | P2   | 90.7(2)  | C6   | P2   | C7   | 103.2(3)  |
| C15  | W1   | P2   | 89.1(2)  | C7   | P2   | W1   | 119.1(2)  |
| C15  | W1   | C14  | 88.3(3)  | C7   | P2   | P1   | 99.3(2)   |

|     |    |     |           |     |     |     |          |
|-----|----|-----|-----------|-----|-----|-----|----------|
| C16 | W1 | P2  | 84.0(2)   | C2  | C1  | P1  | 112.9(4) |
| C16 | W1 | C14 | 174.1(3)  | C1  | C2  | C3  | 115.3(6) |
| C16 | W1 | C15 | 88.8(3)   | C5  | C2  | C1  | 120.6(6) |
| C16 | W1 | C17 | 93.5(3)   | C5  | C2  | C3  | 123.9(6) |
| C17 | W1 | P2  | 100.1(2)  | C2  | C5  | C4  | 125.6(6) |
| C17 | W1 | C14 | 90.2(3)   | C2  | C5  | C6  | 118.6(6) |
| C17 | W1 | C15 | 170.7(3)  | C6  | C5  | C4  | 115.8(6) |
| C18 | W2 | P1  | 98.6(2)   | C5  | C6  | P2  | 116.5(5) |
| C19 | W2 | P1  | 175.9(2)  | C8  | C7  | P2  | 113.9(4) |
| C19 | W2 | C18 | 84.8(3)   | C7  | C8  | C9  | 116.2(6) |
| C19 | W2 | C20 | 92.1(3)   | C11 | C8  | C7  | 118.9(6) |
| C19 | W2 | C21 | 87.9(3)   | C11 | C8  | C9  | 124.9(6) |
| C19 | W2 | C22 | 89.8(3)   | C8  | C11 | C10 | 123.6(6) |
| C20 | W2 | P1  | 90.4(2)   | C8  | C11 | C12 | 119.6(5) |
| C20 | W2 | C18 | 86.5(3)   | C12 | C11 | C10 | 116.8(6) |
| C20 | W2 | C22 | 178.1(3)  | C11 | C12 | P1  | 110.9(4) |
| C21 | W2 | P1  | 88.9(2)   | O3  | C13 | W1  | 179.8(8) |
| C21 | W2 | C18 | 171.7(3)  | O1  | C14 | W1  | 178.5(8) |
| C21 | W2 | C20 | 89.8(4)   | O2  | C15 | W1  | 175.5(7) |
| C21 | W2 | C22 | 90.3(3)   | O4  | C16 | W1  | 176.1(7) |
| C22 | W2 | P1  | 87.77(18) | O5  | C17 | W1  | 173.6(6) |
| C22 | W2 | C18 | 93.7(3)   | O7  | C18 | W2  | 172.7(6) |
| P2  | P1 | W2  | 124.64(7) | O8  | C19 | W2  | 178.9(8) |
| C1  | P1 | W2  | 115.7(2)  | O9  | C20 | W2  | 177.6(9) |
| C1  | P1 | P2  | 98.7(2)   | O10 | C21 | W2  | 176.8(8) |
| C12 | P1 | W2  | 112.9(2)  | O6  | C22 | W2  | 178.7(7) |

---

**X-ray crystallographic data of 9**

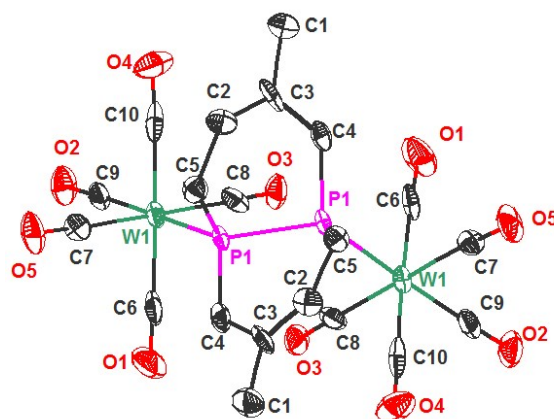

Figure S3 X-ray structure of **9**

Table S7 Crystal data and structure refinement for **9**.

|                                    |                                                               |
|------------------------------------|---------------------------------------------------------------|
| Identification code                | <b>9</b>                                                      |
| Empirical formula                  | C <sub>10</sub> H <sub>8</sub> O <sub>5</sub> PW              |
| Formula weight                     | 422.98                                                        |
| Temperature/K                      | 300.13                                                        |
| Crystal system                     | tetragonal                                                    |
| Space group                        | P4 <sub>1</sub> 2 <sub>1</sub> 2                              |
| a/Å                                | 15.924(5)                                                     |
| b/Å                                | 15.924(5)                                                     |
| c/Å                                | 9.853(3)                                                      |
| α/°                                | 90                                                            |
| β/°                                | 90                                                            |
| γ/°                                | 90                                                            |
| Volume/Å <sup>3</sup>              | 2498.4(17)                                                    |
| Z                                  | 8                                                             |
| ρ <sub>calc</sub> /cm <sup>3</sup> | 2.249                                                         |
| μ/mm <sup>-1</sup>                 | 9.380                                                         |
| F(000)                             | 1576.0                                                        |
| Crystal size/mm <sup>3</sup>       | 0.3 × 0.15 × 0.1                                              |
| Radiation                          | MoKα (λ = 0.71073)                                            |
| 2θ range for data collection/°     | 4.862 to 55.102                                               |
| Index ranges                       | -20 ≤ h ≤ 20, -20 ≤ k ≤ 20, -12 ≤ l ≤ 11                      |
| Reflections collected              | 26658                                                         |
| Independent reflections            | 2880 [R <sub>int</sub> = 0.1267, R <sub>sigma</sub> = 0.0698] |
| Data/restraints/parameters         | 2880/0/155                                                    |
| Goodness-of-fit on F <sup>2</sup>  | 1.121                                                         |

Final R indexes [ $I \geq 2\sigma(I)$ ]  $R_1 = 0.0582$ ,  $wR_2 = 0.1022$   
 Final R indexes [all data]  $R_1 = 0.0898$ ,  $wR_2 = 0.1107$   
 Largest diff. peak/hole /  $e \text{ \AA}^{-3}$  1.35/-0.90  
 Flack parameter 0.076(14)

---

**Table S8 Bond Lengths for 9.**

| Atom | Atom            | Length/Å | Atom | Atom            | Length/Å |
|------|-----------------|----------|------|-----------------|----------|
| W1   | P1              | 2.509(5) | O2   | C9              | 1.18(2)  |
| W1   | C9              | 1.97(2)  | O5   | C7              | 1.14(2)  |
| W1   | C8              | 2.07(2)  | C2   | C3              | 1.33(3)  |
| W1   | C6              | 2.01(3)  | C2   | C5 <sup>1</sup> | 1.51(3)  |
| W1   | C10             | 1.97(3)  | C4   | C3              | 1.53(3)  |
| W1   | C7              | 2.05(2)  | O1   | C6              | 1.17(3)  |
| P1   | P1 <sup>1</sup> | 2.175(8) | C3   | C1              | 1.46(3)  |
| P1   | C4              | 1.80(2)  | O4   | C10             | 1.20(3)  |
| P1   | C5              | 1.84(2)  | C5   | C2 <sup>1</sup> | 1.51(3)  |
| O3   | C8              | 1.10(2)  |      |                 |          |

**Table S9 Bond Angles for 9**

| Atom            | Atom | Atom | Angle/°   | Atom            | Atom | Atom            | Angle/°   |
|-----------------|------|------|-----------|-----------------|------|-----------------|-----------|
| C9              | W1   | P1   | 176.1(6)  | C4              | P1   | W1              | 118.9(7)  |
| C9              | W1   | C8   | 89.3(8)   | C4              | P1   | P1 <sup>1</sup> | 97.3(7)   |
| C9              | W1   | C6   | 90.1(10)  | C4              | P1   | C5              | 103.0(9)  |
| C9              | W1   | C7   | 91.3(8)   | C5              | P1   | W1              | 112.0(7)  |
| C8              | W1   | P1   | 94.6(6)   | C5              | P1   | P1 <sup>1</sup> | 99.3(7)   |
| C6              | W1   | P1   | 90.3(7)   | O2              | C9   | W1              | 178.2(17) |
| C6              | W1   | C8   | 91.5(9)   | C3              | C2   | C5 <sup>1</sup> | 133(2)    |
| C6              | W1   | C7   | 89.4(9)   | O3              | C8   | W1              | 179(2)    |
| C10             | W1   | P1   | 91.9(7)   | C3              | C4   | P1              | 123.7(15) |
| C10             | W1   | C9   | 87.6(9)   | C2              | C3   | C4              | 122(2)    |
| C10             | W1   | C8   | 88.9(9)   | C2              | C3   | C1              | 122(2)    |
| C10             | W1   | C6   | 177.7(10) | C1              | C3   | C4              | 116.4(18) |
| C10             | W1   | C7   | 90.3(9)   | O1              | C6   | W1              | 177(2)    |
| C7              | W1   | P1   | 84.9(6)   | C2 <sup>1</sup> | C5   | P1              | 113.4(14) |
| C7              | W1   | C8   | 179.0(8)  | O4              | C10  | W1              | 177(2)    |
| P1 <sup>1</sup> | P1   | W1   | 122.9(2)  | O5              | C7   | W1              | 177(2)    |



## X-ray crystallographic data of 12

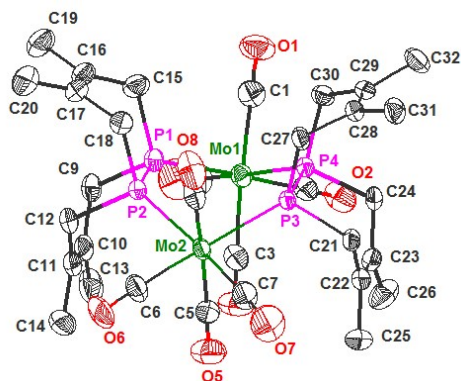

Figure S4 X-ray structure of 12

Table S10 Crystal data and structure refinement for 12

|                                      |                                                                               |
|--------------------------------------|-------------------------------------------------------------------------------|
| Identification code                  | 12                                                                            |
| Empirical formula                    | C <sub>32</sub> H <sub>40</sub> Mo <sub>2</sub> O <sub>8</sub> P <sub>4</sub> |
| Formula weight                       | 868.40                                                                        |
| Temperature/K                        | 293(2)                                                                        |
| Crystal system                       | triclinic                                                                     |
| Space group                          | P-1                                                                           |
| a/Å                                  | 12.1297(4)                                                                    |
| b/Å                                  | 17.3992(6)                                                                    |
| c/Å                                  | 18.9772(7)                                                                    |
| α/°                                  | 87.053(3)                                                                     |
| β/°                                  | 85.059(3)                                                                     |
| γ/°                                  | 74.342(3)                                                                     |
| Volume/Å <sup>3</sup>                | 3840.5(2)                                                                     |
| Z                                    | 4                                                                             |
| ρ <sub>calc</sub> /g/cm <sup>3</sup> | 1.502                                                                         |
| μ/mm <sup>-1</sup>                   | 7.296                                                                         |
| F(000)                               | 1760.0                                                                        |
| Crystal size/mm <sup>3</sup>         | 0.2783 × 0.2328 × 0.2024                                                      |

|                                               |                                                                        |
|-----------------------------------------------|------------------------------------------------------------------------|
| Radiation                                     | CuK $\alpha$ ( $\lambda = 1.54184$ )                                   |
| 2 $\Theta$ range for data collection/°        | 6.95 to 134.156                                                        |
| Index ranges                                  | -14 $\leq$ h $\leq$ 10, -20 $\leq$ k $\leq$ 20, -21 $\leq$ l $\leq$ 22 |
| Reflections collected                         | 30703                                                                  |
| Independent reflections                       | 13720 [ $R_{\text{int}} = 0.0422$ , $R_{\text{sigma}} = 0.0554$ ]      |
| Data/restraints/parameters                    | 13720/0/846                                                            |
| Goodness-of-fit on F <sup>2</sup>             | 1.027                                                                  |
| Final R indexes [ $I \geq 2\sigma(I)$ ]       | $R_1 = 0.0431$ , $wR_2 = 0.1147$                                       |
| Final R indexes [all data]                    | $R_1 = 0.0575$ , $wR_2 = 0.1295$                                       |
| Largest diff. peak/hole / e $\text{\AA}^{-3}$ | 0.66/-0.92                                                             |

---

**Table S11 Bond Lengths for 12**

| Atom | Atom | Length/ $\text{\AA}$ | Atom | Atom | Length/ $\text{\AA}$ |
|------|------|----------------------|------|------|----------------------|
| C1   | Mo1  | 2.029(6)             | C1'  | Mo1' | 2.033(6)             |
| C1   | O1   | 1.144(7)             | C1'  | O1'  | 1.136(7)             |
| C2   | Mo1  | 1.992(6)             | C2'  | Mo1' | 1.999(6)             |
| C2   | O2   | 1.140(7)             | C2'  | O2'  | 1.120(7)             |
| C3   | Mo1  | 2.032(6)             | C3'  | Mo1' | 1.980(6)             |
| C3   | O3   | 1.133(7)             | C3'  | O3'  | 1.132(7)             |
| C4   | Mo1  | 1.986(6)             | C4'  | Mo1' | 2.037(6)             |
| C4   | O4   | 1.147(7)             | C4'  | O4'  | 1.126(7)             |
| C5   | Mo2  | 2.040(6)             | C5'  | Mo2' | 2.044(8)             |
| C5   | O5   | 1.132(7)             | C5'  | O5'  | 1.126(9)             |
| C6   | Mo2  | 1.985(5)             | C6'  | Mo2' | 2.001(7)             |
| C6   | O6   | 1.137(7)             | C6'  | O6'  | 1.122(8)             |
| C7   | Mo2  | 1.981(6)             | C7'  | Mo2' | 2.005(8)             |
| C7   | O7   | 1.126(7)             | C7'  | O7'  | 1.119(10)            |
| C8   | Mo2  | 2.041(6)             | C8'  | Mo2' | 2.062(8)             |
| C8   | O8   | 1.131(7)             | C8'  | O8'  | 1.118(9)             |
| C9   | C10  | 1.510(8)             | C9'  | C10' | 1.492(8)             |
| C9   | P1   | 1.865(5)             | C9'  | P1'  | 1.862(5)             |
| C10  | C11  | 1.317(9)             | C10' | C11' | 1.328(10)            |
| C10  | C13  | 1.531(8)             | C10' | C13' | 1.493(9)             |
| C11  | C12  | 1.509(7)             | C11' | C12' | 1.503(9)             |
| C11  | C14  | 1.512(8)             | C11' | C14' | 1.523(10)            |
| C12  | P2   | 1.859(5)             | C12' | P2'  | 1.866(5)             |
| C15  | C16  | 1.486(8)             | C15' | C16' | 1.510(8)             |

|     |     |            |            |      |            |            |
|-----|-----|------------|------------|------|------------|------------|
| C15 | P1  | 1.859(5)   | C15'       | P1'  | 1.854(5)   |            |
| C16 | C17 | 1.324(8)   | C16'       | C17' | 1.301(10)  |            |
| C16 | C19 | 1.516(7)   | C16'       | C19' | 1.506(8)   |            |
| C17 | C18 | 1.506(7)   | C17'       | C18' | 1.499(9)   |            |
| C17 | C20 | 1.517(8)   | C17'       | C20' | 1.507(8)   |            |
| C18 | P2  | 1.858(5)   | C18'       | P2'  | 1.863(6)   |            |
| C21 | C22 | 1.499(7)   | C21'       | C22' | 1.516(7)   |            |
| C21 | P3  | 1.856(4)   | C21'       | P3'  | 1.856(4)   |            |
| C22 | C23 | 1.320(8)   | C22'       | C23' | 1.334(8)   |            |
| C22 | C25 | 1.506(7)   | C22'       | C25' | 1.509(7)   |            |
| C23 | C24 | 1.512(7)   | C23'       | C24' | 1.509(7)   |            |
| C23 | C26 | 1.524(8)   | C23'       | C26' | 1.497(8)   |            |
| C24 | P4  | 1.857(4)   | C24'       | P4'  | 1.863(4)   |            |
| C27 | C28 | 1.497(6)   | C27'       | C28' | 1.502(6)   |            |
| C27 | P3  | 1.865(5)   | C27'       | P3'  | 1.862(5)   |            |
| C28 | C29 | 1.322(7)   | C28'       | C29' | 1.318(8)   |            |
| C28 | C31 | 1.523(6)   | C28'       | C31' | 1.508(7)   |            |
| C29 | C30 | 1.516(7)   | C29'       | C30' | 1.500(7)   |            |
| C29 | C32 | 1.508(7)   | C29'       | C32' | 1.529(7)   |            |
| C30 | P4  | 1.854(5)   | C30'       | P4'  | 1.851(5)   |            |
| Mo1 | P1  | 2.5311(13) | Mo1'       | P1'  | 2.5141(12) |            |
| Mo1 | P4  | 2.5283(11) | Mo1'       | P3'  | 2.5391(11) |            |
| Mo2 | P2  | 2.5318(12) | Mo2'       | P2'  | 2.5242(14) |            |
| Mo2 | P3  | 2.5235(11) | Mo2'       | P4'  | 2.5170(12) |            |
|     | P1  | P2         | 2.2299(18) | P1'  | P2'        | 2.2226(19) |
|     | P3  | P4         | 2.2277(16) | P3'  | P4'        | 2.2275(15) |

**Table S12 Bond Angles for 12**

| Atom | Atom | Atom | Angle/°  | Atom | Atom | Atom | Angle/°   |
|------|------|------|----------|------|------|------|-----------|
| O1   | C1   | Mo1  | 178.1(6) | O1'  | C1'  | Mo1' | 171.7(6)  |
| O2   | C2   | Mo1  | 175.8(5) | O2'  | C2'  | Mo1' | 177.1(6)  |
| O3   | C3   | Mo1  | 174.3(5) | O3'  | C3'  | Mo1' | 177.3(7)  |
| O4   | C4   | Mo1  | 176.4(7) | O4'  | C4'  | Mo1' | 173.6(6)  |
| O5   | C5   | Mo2  | 170.0(6) | O5'  | C5'  | Mo2' | 171.0(7)  |
| O6   | C6   | Mo2  | 176.7(6) | O6'  | C6'  | Mo2' | 176.1(7)  |
| O7   | C7   | Mo2  | 176.9(6) | O7'  | C7'  | Mo2' | 177.0(11) |
| O8   | C8   | Mo2  | 173.1(6) | O8'  | C8'  | Mo2' | 173.1(8)  |

|     |     |     |            |      |      |      |            |
|-----|-----|-----|------------|------|------|------|------------|
| C10 | C9  | P1  | 111.4(4)   | C10' | C9'  | P1'  | 111.2(4)   |
| C9  | C10 | C13 | 114.8(6)   | C9'  | C10' | C13' | 117.7(7)   |
| C11 | C10 | C9  | 120.0(5)   | C11' | C10' | C9'  | 117.9(6)   |
| C11 | C10 | C13 | 125.2(6)   | C11' | C10' | C13' | 124.3(7)   |
| C10 | C11 | C12 | 118.8(5)   | C10' | C11' | C12' | 120.9(6)   |
| C10 | C11 | C14 | 124.5(6)   | C10' | C11' | C14' | 125.0(8)   |
| C12 | C11 | C14 | 116.7(6)   | C12' | C11' | C14' | 114.1(8)   |
| C11 | C12 | P2  | 109.8(3)   | C11' | C12' | P2'  | 113.2(4)   |
| C16 | C15 | P1  | 116.4(4)   | C16' | C15' | P1'  | 113.9(4)   |
| C15 | C16 | C19 | 116.5(6)   | C17' | C16' | C15' | 120.4(5)   |
| C17 | C16 | C15 | 119.3(5)   | C17' | C16' | C19' | 124.6(7)   |
| C17 | C16 | C19 | 124.1(6)   | C19' | C16' | C15' | 115.0(7)   |
| C16 | C17 | C18 | 119.9(5)   | C16' | C17' | C18' | 120.2(5)   |
| C16 | C17 | C20 | 125.2(6)   | C16' | C17' | C20' | 123.9(7)   |
| C18 | C17 | C20 | 114.9(6)   | C18' | C17' | C20' | 115.9(7)   |
| C17 | C18 | P2  | 114.6(4)   | C17' | C18' | P2'  | 115.7(4)   |
| C22 | C21 | P3  | 111.5(3)   | C22' | C21' | P3'  | 110.9(3)   |
| C21 | C22 | C25 | 115.9(6)   | C23' | C22' | C21' | 118.9(5)   |
| C23 | C22 | C21 | 119.3(5)   | C23' | C22' | C25' | 124.6(6)   |
| C23 | C22 | C25 | 124.7(6)   | C25' | C22' | C21' | 116.5(5)   |
| C22 | C23 | C24 | 119.0(5)   | C22' | C23' | C24' | 118.9(5)   |
| C22 | C23 | C26 | 125.0(6)   | C22' | C23' | C26' | 124.4(5)   |
| C24 | C23 | C26 | 116.0(6)   | C26' | C23' | C24' | 116.7(5)   |
| C23 | C24 | P4  | 111.0(3)   | C23' | C24' | P4'  | 110.4(3)   |
| C28 | C27 | P3  | 114.4(3)   | C28' | C27' | P3'  | 115.3(3)   |
| C27 | C28 | C31 | 114.4(4)   | C27' | C28' | C31' | 114.6(5)   |
| C29 | C28 | C27 | 120.5(4)   | C29' | C28' | C27' | 120.2(4)   |
| C29 | C28 | C31 | 125.0(4)   | C29' | C28' | C31' | 125.2(5)   |
| C28 | C29 | C30 | 120.1(4)   | C28' | C29' | C30' | 119.9(4)   |
| C28 | C29 | C32 | 125.2(5)   | C28' | C29' | C32' | 125.4(5)   |
| C32 | C29 | C30 | 114.7(5)   | C30' | C29' | C32' | 114.8(5)   |
| C29 | C30 | P4  | 115.2(3)   | C29' | C30' | P4'  | 115.7(3)   |
| C1  | Mo1 | C3  | 176.3(2)   | C1'  | Mo1' | C4'  | 170.6(2)   |
| C1  | Mo1 | P1  | 91.86(18)  | C1'  | Mo1' | P1'  | 91.61(16)  |
| C1  | Mo1 | P4  | 87.99(17)  | C1'  | Mo1' | P3'  | 98.74(17)  |
| C2  | Mo1 | C1  | 88.5(2)    | C2'  | Mo1' | C1'  | 89.6(2)    |
| C2  | Mo1 | C3  | 87.9(2)    | C2'  | Mo1' | C4'  | 88.7(2)    |
| C2  | Mo1 | P1  | 173.46(16) | C2'  | Mo1' | P1'  | 176.47(17) |
| C2  | Mo1 | P4  | 89.97(16)  | C2'  | Mo1' | P3'  | 89.65(16)  |

|     |     |     |            |      |      |      |            |
|-----|-----|-----|------------|------|------|------|------------|
| C3  | Mo1 | P1  | 91.79(16)  | C3'  | Mo1' | C1'  | 86.7(2)    |
| C3  | Mo1 | P4  | 91.24(16)  | C3'  | Mo1' | C2'  | 86.1(3)    |
| C4  | Mo1 | C1  | 88.7(3)    | C3'  | Mo1' | C4'  | 84.0(2)    |
| C4  | Mo1 | C2  | 84.6(3)    | C3'  | Mo1' | P1'  | 90.7(2)    |
| C4  | Mo1 | C3  | 91.7(3)    | C3'  | Mo1' | P3'  | 173.06(19) |
| C4  | Mo1 | P1  | 88.8(2)    | C4'  | Mo1' | P1'  | 89.62(18)  |
| C4  | Mo1 | P4  | 173.7(2)   | C4'  | Mo1' | P3'  | 90.48(16)  |
| P4  | Mo1 | P1  | 96.57(4)   | P1'  | Mo1' | P3'  | 93.44(4)   |
| C5  | Mo2 | C8  | 171.5(2)   | C5'  | Mo2' | C8'  | 173.1(3)   |
| C5  | Mo2 | P2  | 96.72(16)  | C5'  | Mo2' | P2'  | 97.2(2)    |
| C5  | Mo2 | P3  | 96.37(16)  | C5'  | Mo2' | P4'  | 94.1(2)    |
| C6  | Mo2 | C5  | 86.5(2)    | C6'  | Mo2' | C5'  | 86.6(3)    |
| C6  | Mo2 | C8  | 87.8(2)    | C6'  | Mo2' | C7'  | 85.9(4)    |
| C6  | Mo2 | P2  | 89.20(18)  | C6'  | Mo2' | C8'  | 87.7(3)    |
| C6  | Mo2 | P3  | 174.28(18) | C6'  | Mo2' | P2'  | 173.9(2)   |
| C7  | Mo2 | C5  | 86.8(3)    | C6'  | Mo2' | P4'  | 90.3(2)    |
| C7  | Mo2 | C6  | 85.9(3)    | C7'  | Mo2' | C5'  | 86.3(5)    |
| C7  | Mo2 | C8  | 86.6(3)    | C7'  | Mo2' | C8'  | 89.4(4)    |
| C7  | Mo2 | P2  | 173.8(2)   | C7'  | Mo2' | P2'  | 89.6(3)    |
| C7  | Mo2 | P3  | 89.31(19)  | C7'  | Mo2' | P4'  | 176.1(3)   |
| C8  | Mo2 | P2  | 89.48(18)  | C8'  | Mo2' | P2'  | 88.2(2)    |
| C8  | Mo2 | P3  | 88.78(16)  | C8'  | Mo2' | P4'  | 89.9(2)    |
| P3  | Mo2 | P2  | 95.35(4)   | P4'  | Mo2' | P2'  | 94.16(4)   |
| C9  | P1  | Mo1 | 114.31(19) | C9'  | P1'  | Mo1' | 114.23(19) |
| C9  | P1  | P2  | 98.6(2)    | C9'  | P1'  | P2'  | 99.1(2)    |
| C15 | P1  | C9  | 102.6(3)   | C15' | P1'  | C9'  | 102.6(2)   |
| C15 | P1  | Mo1 | 113.8(2)   | C15' | P1'  | Mo1' | 115.1(2)   |
| C15 | P1  | P2  | 99.52(19)  | C15' | P1'  | P2'  | 98.8(2)    |
| P2  | P1  | Mo1 | 124.80(6)  | P2'  | P1'  | Mo1' | 123.67(6)  |
| C12 | P2  | Mo2 | 113.53(19) | C12' | P2'  | Mo2' | 115.2(2)   |
| C12 | P2  | P1  | 98.96(19)  | C12' | P2'  | P1'  | 98.6(2)    |
| C18 | P2  | C12 | 103.6(2)   | C18' | P2'  | C12' | 101.6(3)   |
| C18 | P2  | Mo2 | 114.04(18) | C18' | P2'  | Mo2' | 112.50(19) |
| C18 | P2  | P1  | 98.09(19)  | C18' | P2'  | P1'  | 99.5(2)    |
| P1  | P2  | Mo2 | 125.42(6)  | P1'  | P2'  | Mo2' | 125.77(6)  |
| C21 | P3  | C27 | 101.8(2)   | C21' | P3'  | C27' | 103.2(2)   |
| C21 | P3  | Mo2 | 114.72(16) | C21' | P3'  | Mo1' | 115.94(16) |
| C21 | P3  | P4  | 98.52(16)  | C21' | P3'  | P4'  | 98.60(17)  |
| C27 | P3  | Mo2 | 112.23(15) | C27' | P3'  | Mo1' | 110.63(15) |

|     |    |     |            |      |     |      |            |
|-----|----|-----|------------|------|-----|------|------------|
| C27 | P3 | P4  | 99.83(16)  | C27' | P3' | P4'  | 99.68(16)  |
| P4  | P3 | Mo2 | 126.20(5)  | P4'  | P3' | Mo1' | 125.62(5)  |
| C24 | P4 | Mo1 | 114.10(17) | C24' | P4' | Mo2' | 114.84(17) |
| C24 | P4 | P3  | 98.78(17)  | C24' | P4' | P3'  | 98.95(16)  |
| C30 | P4 | C24 | 102.4(2)   | C30' | P4' | C24' | 103.6(2)   |
| C30 | P4 | Mo1 | 114.72(16) | C30' | P4' | Mo2' | 114.23(16) |
| C30 | P4 | P3  | 99.22(17)  | C30' | P4' | P3'  | 98.64(17)  |
| P3  | P4 | Mo1 | 124.30(5)  | P3'  | P4' | Mo2' | 123.50(5)  |

## DFT calculations

### Computational Methods

All of the calculations were carried out by using Gaussian09.<sup>[1]</sup> The optimized structures were illustrated using CYLView.<sup>[2]</sup> The density functional theory (DFT) calculations were performed with the B3LYP<sup>[3, 4]</sup> functional using the integral equation formalism polarizable continuum model IEF-PCM<sup>[5]</sup> in toluene solvent, and basis set 6-31G(d) was employed for H, C, O, N, and P atoms, while LANL2DZ for W was used.<sup>[6]</sup> Then, frequency calculations at the same level of theory were carried out to identify all of the stationary points as minima (zero imaginary frequency) or transition state (only one frequency), and to provide corrections for free energies. The intrinsic reaction coordinate (IRC)<sup>[7, 8]</sup> calculations were performed for the transition states at the same level to confirm that each transition state links the corresponding reactant and product well. To value whether the aforementioned computational method (i.e. B3LYP) is proper and reliable, we have additionally re-optimized all the stationary points such as reactants, intermediates, transition states by employing multiple DFT methods and levels including L1 (B3LYP/6-31G(d)/LANL2DZ//IEF-PCM<sub>Toluene</sub>), L2 (B3LYP/def2-tzvp//IEF-PCM<sub>Toluene</sub>), L3 ( $\omega$ B97XD/def2-tzvp//IEF-PCM<sub>Toluene</sub>), L4 (M06L/def2-tzvp//IEF-PCM<sub>Toluene</sub>) and L5 (B3LYP-D3/6-31G(d)/LANL2DZ//IEF-PCM<sub>Toluene</sub>), and then the frequencies were computed at the same levels.

### References

- [1] G.W. Trucks, M.J. Frisch, H.B. Schlegel, G.E. Scuseria, M.A. Robb, J.R. Cheeseman, G. Scalmani, V. Barone, B. Mennucci, G.A. Petersson, H. Nakatsuji, M. Caricato, X. Li, H.P. Hratchian, A.F. Izmaylov, J. Bloino, G. Zheng, J.L. Sonnenberg, M. Hada, M. Ehara, K. Toyota, R. Fukuda, J. Hasegawa, M. Ishida, T. Nakajima, Y. Honda, O. Kitao, H. Nakai, T. Vreven, J.A. Montgomery, Jr, J.E. Peralta, F. Ogliaro, M. Bearpark, J.J. Heyd, E. Brothers, K.N. Kudin, V.N. Staroverov, T. Keith, R. Kobayashi, J. Normand, K. Raghavachari, A. Rendell, J.C. Burant, S.S. Iyengar, J. Tomasi, M. Cossi, N. Rega, J.M. Millam, M. Klene, J.E. Knox, J.B. Cross, V. Bakken, C. Adamo, J. Jaramillo, R. Gomperts, R.E. Stratmann, O. Yazyev, A.J. Austin, R. Cammi, C. Pomelli, J.W. Ochterski, R.L. Martin, K. Morokuma, V.G. Zakrzewski, G.A. Voth, P. Salvador, J.J. Dannenberg, S. Dapprich, A.D. Daniels, O. Farkas, J.B. Foresman, J.V. Ortiz, J. Cioslowski, D.J. Fox, Revision D.01, (2010).
- [2] C. Y. Legault, CYLview, 1.0 b, Universit'e de Sherbrooke, 2009, <http://www.cylview.org>.
- [3] A. D. Becke, *J. Chem. Phys.*, 1993, **98**, 5648.
- [4] C.T. Lee, W.T. Yang, R.G. Parr, *Phys. Rev. B.*, 1988, **37**, 785.
- [5] (a) B. Mennucci and J. Tomasi, *J. Chem. Phys.*, 1997, **106**, 5151–5158; (b) V. Barone and M. Cossi, *J. Phys. Chem. A*, 1998, **102**, 1995–2001.
- [6] P. J. Hay, W. R. Wadt, *J. Chem. Phys.*, 1985, **82**, 299.
- [7] C. Gonzalez and H. B. Schlegel, *J. Phys. Chem.*, 1990, **94**, 5523-5527.
- [8] C. Gonzalez and H. B. Schlegel, *J. Chem. Phys.*, 1989, **90**, 2154-2161.

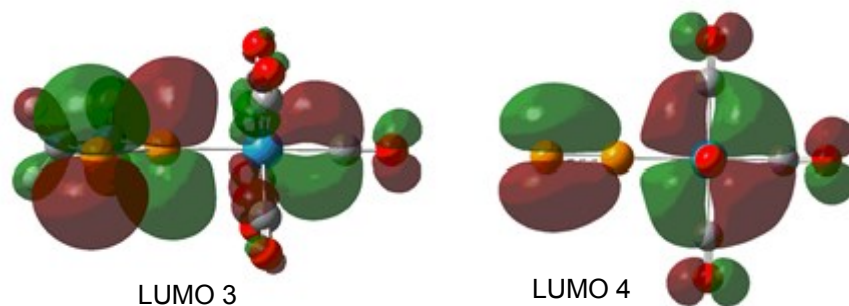

**Figure S5** Selected frontier orbitals

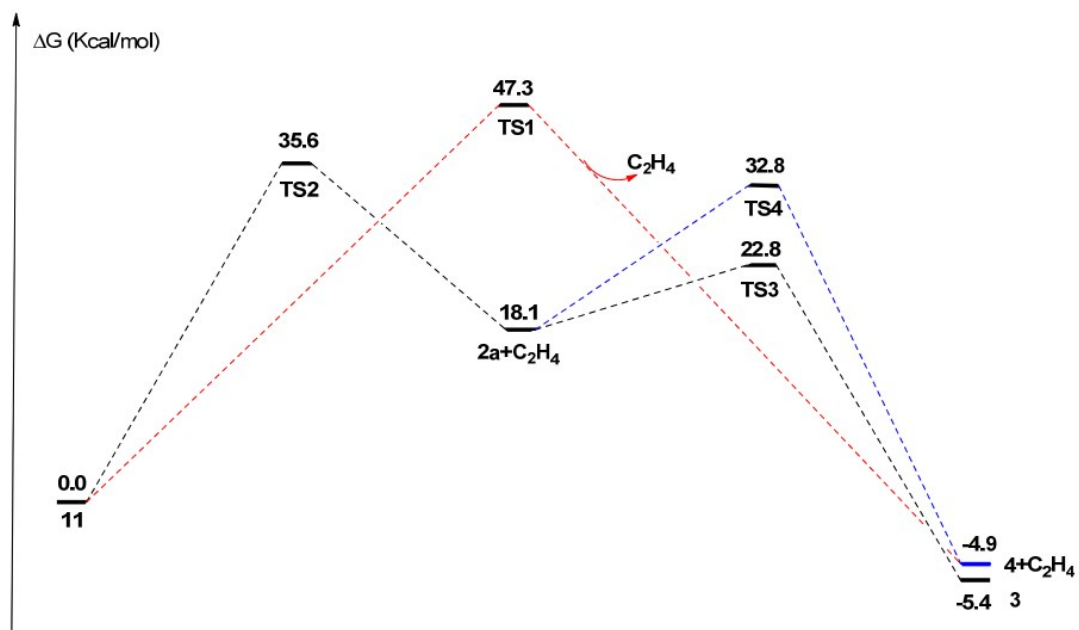

**Figure S6** Computed energy profile (Kcal/mol) for the reaction with **11** at the L2 (B3LYP/def2-tzvp//IEF-PCM<sub>Toluene</sub>) level

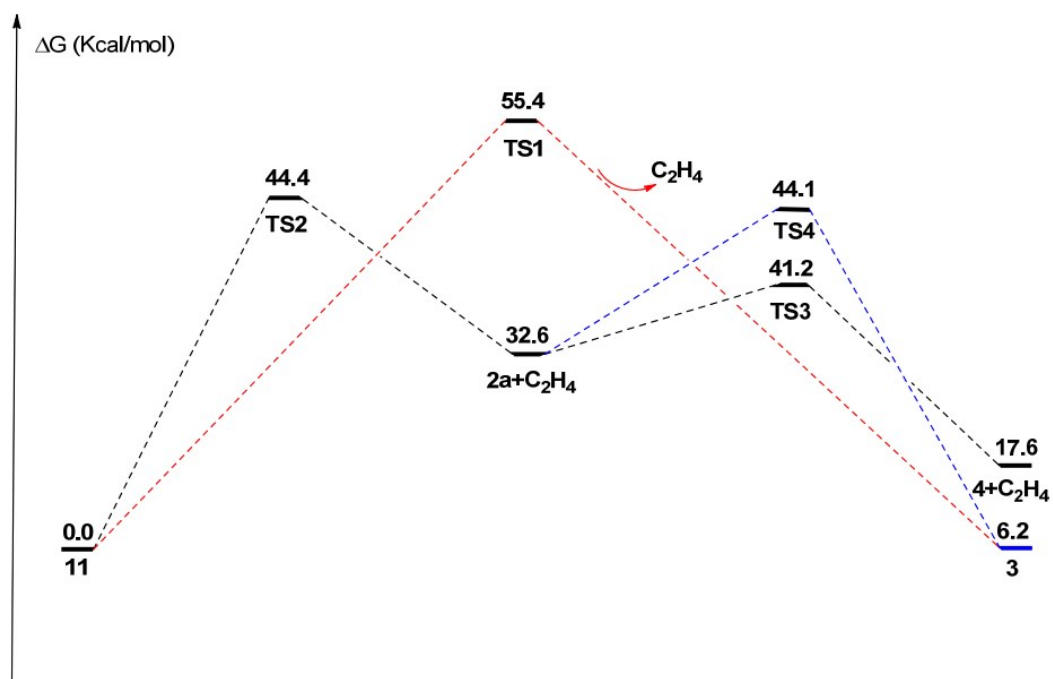

**Figure S7** Computed energy profile (Kcal/mol) for the reaction with **11** at the L3 ( $\omega$ B97XD/def2-tzvp//IEF-PCM<sub>Toluene</sub>) level



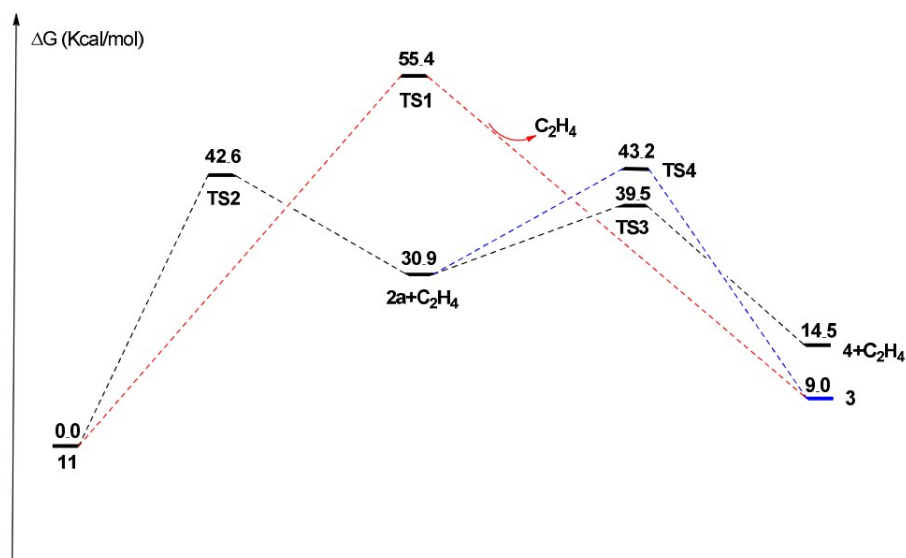

**Figure S8** Computed energy profiles (Kcal/mol) for the reaction with **11** at the L4 (M06L/def2-tzvp//IEF-PCM<sub>Toluene</sub>) level

**Table S13** Gibbs free energy barriers (Kcal/mol) for the reaction with **11** calculated at the L1 (B3LYP/6-31G(d)/LanL2DZ//IEF-PCM<sub>Toluene</sub>) level and the L5 (B3LYP-D3/6-31G(d)/Lan2LDZ//IEF-PCM<sub>Toluene</sub>) level

| Computational level | $\Delta G^{\ddagger}_{TS1}$ | $\Delta G^{\ddagger}_{TS2}$ | $\Delta G^{\ddagger}_{TS3}$ | $\Delta G^{\ddagger}_{TS4}$ |
|---------------------|-----------------------------|-----------------------------|-----------------------------|-----------------------------|
| L1                  | 49.2                        | 34.4                        | 5.1                         | 15.4                        |
| L5                  | 49.2                        | 34.6                        | 3.8                         | 14.4                        |

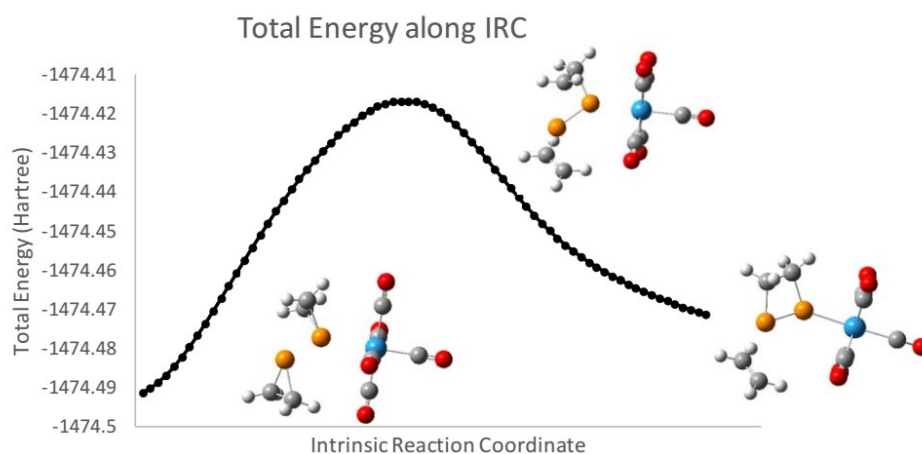

**Figure S9** The IRC plots of TS1 calculated at the L1 (B3LYP/6-31G(d)/LanL2DZ) level

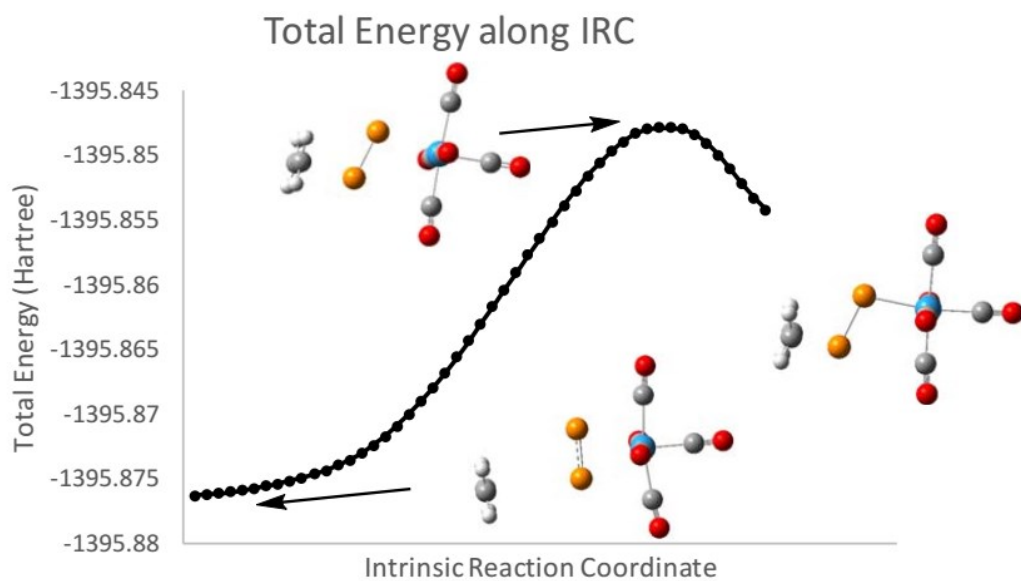

**Figure S10** The IRC plots of TS3 calculated at the L1 (B3LYP/6-31G(d)/LanL2DZ) level

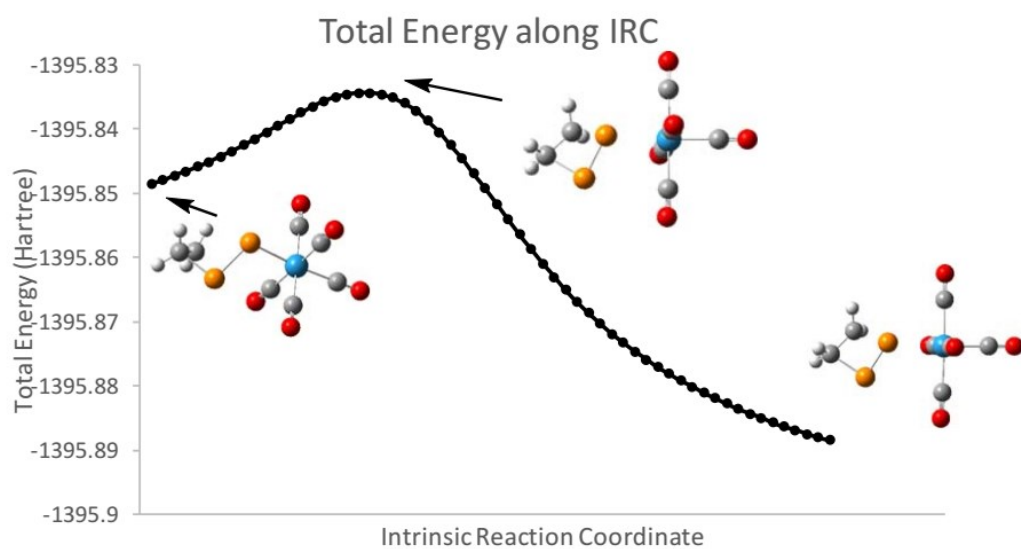

**Figure S11** The IRC plots of TS4 calculated at the L1 (B3LYP/6-31G(d)/LanL2DZ) level

## Energies and Geometrical Coordinates of the Listed Complexes

### 11 (L1)

|                                 |                             |
|---------------------------------|-----------------------------|
| Zero-point correction=          | 0.154668 (Hartree/Particle) |
| Thermal correction to Energy=   | 0.175525                    |
| Thermal correction to Enthalpy= | 0.176469                    |

|                                              |  |  |              |
|----------------------------------------------|--|--|--------------|
| Thermal correction to Gibbs Free Energy=     |  |  | 0.101457     |
| Sum of electronic and zero-point Energies=   |  |  | -1474.345596 |
| Sum of electronic and thermal Energies=      |  |  | -1474.324739 |
| Sum of electronic and thermal Enthalpies=    |  |  | -1474.323795 |
| Sum of electronic and thermal Free Energies= |  |  | -1474.398807 |

0 1

|   |             |             |             |
|---|-------------|-------------|-------------|
| P | -1.54080900 | 0.88909700  | 0.00731600  |
| W | 0.85966400  | -0.10039600 | 0.00034700  |
| C | 0.38163000  | -1.51085000 | -1.41461200 |
| C | 0.41176700  | -1.42118300 | 1.50889000  |
| C | 2.76063800  | -0.75127800 | -0.00294600 |
| C | 1.34275300  | 1.31746000  | 1.40901100  |
| C | 1.30149700  | 1.22987000  | -1.50392500 |
| O | 0.14218600  | -2.30889600 | -2.21691900 |
| O | 0.18407300  | -2.16882000 | 2.36143300  |
| O | 3.86015200  | -1.12011700 | -0.00465400 |
| O | 1.60929600  | 2.11893700  | 2.19730800  |
| O | 1.54355800  | 1.98277900  | -2.34617600 |
| P | -3.57860900 | -0.02802000 | 0.05828300  |
| C | -1.90019600 | 2.56438200  | 0.73401000  |
| H | -2.84812600 | 2.69079700  | 1.25206400  |
| H | -1.06123300 | 3.05014800  | 1.22604000  |
| C | -1.91993200 | 2.53637300  | -0.77143900 |
| H | -2.88069700 | 2.64429900  | -1.26959900 |
| H | -1.09336000 | 3.00171300  | -1.30275700 |
| C | -3.28670700 | -1.68588800 | -0.77843500 |
| H | -2.36699400 | -1.82424100 | -1.33855800 |
| H | -4.16669100 | -2.08760100 | -1.27605200 |
| C | -3.22438700 | -1.75419400 | 0.71119000  |
| H | -2.26196500 | -1.93885700 | 1.17841700  |
| H | -4.06126700 | -2.20232200 | 1.24237300  |

**3 (L1)**

|                                              |  |  |                             |
|----------------------------------------------|--|--|-----------------------------|
| Zero-point correction=                       |  |  | 0.099766 (Hartree/Particle) |
| Thermal correction to Energy=                |  |  | 0.117835                    |
| Thermal correction to Enthalpy=              |  |  | 0.118779                    |
| Thermal correction to Gibbs Free Energy=     |  |  | 0.048734                    |
| Sum of electronic and zero-point Energies=   |  |  | -1395.796247                |
| Sum of electronic and thermal Energies=      |  |  | -1395.778178                |
| Sum of electronic and thermal Enthalpies=    |  |  | -1395.777234                |
| Sum of electronic and thermal Free Energies= |  |  | -1395.847279                |

0 1

|   |            |             |             |
|---|------------|-------------|-------------|
| W | 0.69743700 | -0.00444100 | 0.00000200  |
| C | 0.70624400 | 1.45912400  | 1.44982900  |
| C | 0.70623200 | 1.45689700  | -1.45208800 |
| C | 2.72935200 | -0.01952300 | -0.00001700 |
| C | 0.67419200 | -1.47233400 | -1.45058600 |
| C | 0.67426100 | -1.47008200 | 1.45287500  |
| O | 0.71371700 | 2.28023700  | 2.26057200  |
| O | 0.71373300 | 2.27678800  | -2.26406200 |
| O | 3.88554000 | -0.02615300 | -0.00003700 |
| O | 0.66211900 | -2.29252300 | -2.26055900 |
| O | 0.66220700 | -2.28901800 | 2.26411400  |

|   |             |             |             |
|---|-------------|-------------|-------------|
| C | -3.00077300 | 1.45626300  | 0.00008600  |
| H | -2.90703900 | 2.09478500  | -0.88528900 |
| H | -2.90696400 | 2.09480300  | 0.88543800  |
| C | -4.26504800 | 0.55892400  | 0.00011000  |
| H | -4.89388600 | 0.70432800  | 0.88463500  |
| H | -4.89410500 | 0.70454300  | -0.88422300 |
| P | -1.78038000 | 0.04837900  | -0.00001400 |
| P | -3.44986000 | -1.16038200 | -0.00013300 |

#### 2a (L1)

|                                              |                             |
|----------------------------------------------|-----------------------------|
| Zero-point correction=                       | 0.098138 (Hartree/Particle) |
| Thermal correction to Energy=                | 0.116953                    |
| Thermal correction to Enthalpy=              | 0.117897                    |
| Thermal correction to Gibbs Free Energy=     | 0.046982                    |
| Sum of electronic and zero-point Energies=   | -1395.759478                |
| Sum of electronic and thermal Energies=      | -1395.740664                |
| Sum of electronic and thermal Enthalpies=    | -1395.739719                |
| Sum of electronic and thermal Free Energies= | -1395.810634                |

0 1

|   |             |             |             |
|---|-------------|-------------|-------------|
| W | -0.73203600 | 0.00428100  | 0.00002100  |
| C | -0.16342800 | 1.37992600  | -1.43270500 |
| C | -0.16416000 | 1.37964600  | 1.43336700  |
| C | -2.65851500 | 0.75799400  | -0.00020200 |
| C | -1.27605100 | -1.38052800 | 1.43540300  |
| C | -1.27603100 | -1.38006000 | -1.43591000 |
| O | 0.16754300  | 2.14796200  | -2.22504200 |
| O | 0.16635100  | 2.14757500  | 2.22599600  |
| O | -3.72707700 | 1.19220500  | -0.00037500 |
| O | -1.58479600 | -2.15864000 | 2.22736800  |
| O | -1.58483200 | -2.15785600 | -2.22815100 |
| C | 4.48010000  | -0.46786200 | -0.72621100 |
| H | 5.17025900  | 0.18311200  | -1.25732300 |
| H | 4.20138500  | -1.37388000 | -1.25504000 |
| C | 4.47957700  | -0.46668500 | 0.72708600  |
| H | 4.20073300  | -1.37188900 | 1.25722500  |
| H | 5.16938300  | 0.18530000  | 1.25742700  |
| P | 2.99682800  | 0.58119100  | -0.00084100 |
| P | 1.49666700  | -0.99745800 | 0.00036200  |

#### 4 (L1)

|                                              |                             |
|----------------------------------------------|-----------------------------|
| Zero-point correction=                       | 0.044397 (Hartree/Particle) |
| Thermal correction to Energy=                | 0.059978                    |
| Thermal correction to Enthalpy=              | 0.060922                    |
| Thermal correction to Gibbs Free Energy=     | -0.002063                   |
| Sum of electronic and zero-point Energies=   | -1317.238376                |
| Sum of electronic and thermal Energies=      | -1317.222795                |
| Sum of electronic and thermal Enthalpies=    | -1317.221851                |
| Sum of electronic and thermal Free Energies= | -1317.284836                |

0 1

|   |             |            |             |
|---|-------------|------------|-------------|
| P | -3.98846000 | 0.00079200 | -0.00043300 |
| P | -2.08384800 | 0.00095300 | -0.00049700 |
| W | 0.36144800  | 0.00003000 | -0.00000500 |
| C | 0.37662000  | 2.06723100 | -0.05633400 |

|   |            |             |             |
|---|------------|-------------|-------------|
| C | 0.37563500 | -0.05621300 | -2.06719800 |
| C | 2.39337000 | -0.00205500 | 0.00112600  |
| C | 0.37313700 | -2.06717100 | 0.05630900  |
| C | 0.37397300 | 0.05643300  | 2.06720700  |
| O | 0.39636400 | 3.21746700  | -0.08754800 |
| O | 0.39544200 | -0.08705200 | -3.21744600 |
| O | 3.54722600 | -0.00282800 | 0.00133200  |
| O | 0.39081700 | -3.21745500 | 0.08715500  |
| O | 0.39278600 | 0.08765200  | 3.21745900  |

### C<sub>2</sub>H<sub>4</sub> (L1)

|                                              |                             |
|----------------------------------------------|-----------------------------|
| Zero-point correction=                       | 0.051200 (Hartree/Particle) |
| Thermal correction to Energy=                | 0.054242                    |
| Thermal correction to Enthalpy=              | 0.055186                    |
| Thermal correction to Gibbs Free Energy=     | 0.029669                    |
| Sum of electronic and zero-point Energies=   | -78.535165                  |
| Sum of electronic and thermal Energies=      | -78.532123                  |
| Sum of electronic and thermal Enthalpies=    | -78.531179                  |
| Sum of electronic and thermal Free Energies= | -78.556696                  |

0 1

|   |             |             |            |
|---|-------------|-------------|------------|
| C | 0.00000000  | -0.66589500 | 0.00000000 |
| H | -0.92396300 | -1.23983600 | 0.00000000 |
| H | 0.92392300  | -1.23988300 | 0.00000000 |
| C | 0.00000000  | 0.66589500  | 0.00000000 |
| H | 0.92396300  | 1.23983600  | 0.00000000 |
| H | -0.92392300 | 1.23988300  | 0.00000000 |

### TS1 (L1)

|                                              |                             |
|----------------------------------------------|-----------------------------|
| Zero-point correction=                       | 0.151269 (Hartree/Particle) |
| Thermal correction to Energy=                | 0.173211                    |
| Thermal correction to Enthalpy=              | 0.174155                    |
| Thermal correction to Gibbs Free Energy=     | 0.096423                    |
| Sum of electronic and zero-point Energies=   | -1474.265611                |
| Sum of electronic and thermal Energies=      | -1474.243669                |
| Sum of electronic and thermal Enthalpies=    | -1474.242725                |
| Sum of electronic and thermal Free Energies= | -1474.320456                |

0 1

|   |             |             |             |
|---|-------------|-------------|-------------|
| P | 1.41295900  | 0.77567500  | 0.31463600  |
| W | -0.90962300 | -0.12171000 | -0.00583600 |
| C | -1.48223700 | 1.65240900  | -0.88553200 |
| C | -1.39369000 | 0.64056500  | 1.83946900  |
| C | -2.79214300 | -0.84091200 | -0.23634200 |
| C | -0.33742500 | -1.90374900 | 0.85056600  |
| C | -0.34821800 | -0.85606400 | -1.84857800 |
| O | -1.80343000 | 2.64572000  | -1.37883000 |
| O | -1.65616300 | 1.07727400  | 2.87643900  |
| O | -3.86819600 | -1.24666800 | -0.36573600 |
| O | -0.01437300 | -2.90884400 | 1.32019300  |
| O | -0.02529700 | -1.26643400 | -2.87665800 |
| P | 3.22402300  | 0.45191400  | -0.65546800 |
| C | 2.22270800  | 2.60191000  | -0.42039900 |
| H | 3.21174600  | 3.02258200  | -0.57010700 |
| H | 1.50550300  | 2.91402100  | -1.17597100 |
| C | 1.69867200  | 2.46732500  | 0.99018800  |
| H | 2.45858200  | 2.54991400  | 1.76585600  |

|   |            |             |             |
|---|------------|-------------|-------------|
| H | 0.78596800 | 3.01821500  | 1.22850000  |
| C | 4.30206100 | -1.55770400 | 0.86337300  |
| H | 3.85989700 | -1.36402100 | 1.83625000  |
| H | 5.34567500 | -1.28184700 | 0.74291100  |
| C | 3.60930000 | -2.16444000 | -0.12434700 |
| H | 2.58599200 | -2.49912400 | 0.01945800  |
| H | 4.06949500 | -2.41146900 | -1.07621500 |

### TS2 (L1)

|                                              |                             |
|----------------------------------------------|-----------------------------|
| Zero-point correction=                       | 0.151125 (Hartree/Particle) |
| Thermal correction to Energy=                | 0.173323                    |
| Thermal correction to Enthalpy=              | 0.174268                    |
| Thermal correction to Gibbs Free Energy=     | 0.095580                    |
| Sum of electronic and zero-point Energies=   | -1474.288409                |
| Sum of electronic and thermal Energies=      | -1474.266210                |
| Sum of electronic and thermal Enthalpies=    | -1474.265266                |
| Sum of electronic and thermal Free Energies= | -1474.343954                |

0 1

|   |             |             |             |
|---|-------------|-------------|-------------|
| W | -0.90433500 | -0.03039300 | 0.03052600  |
| C | -0.08077200 | -1.06395800 | 1.60771200  |
| C | -1.14693200 | -1.83542100 | -0.95692300 |
| C | -2.80319000 | -0.24393000 | 0.77521500  |
| C | -1.65733400 | 1.02424800  | -1.56962400 |
| C | -0.68448000 | 1.74016700  | 1.07117400  |
| O | 0.37151800  | -1.63965300 | 2.50007900  |
| O | -1.28232600 | -2.84585300 | -1.49274100 |
| O | -3.87231500 | -0.36558000 | 1.19669600  |
| O | -2.07536200 | 1.62267700  | -2.46311100 |
| O | -0.55429800 | 2.72894100  | 1.65128500  |
| C | 3.43226900  | -1.25733600 | 1.00474900  |
| H | 3.67776600  | -2.18096400 | 1.52552700  |
| H | 3.09599200  | -0.46093300 | 1.66377100  |
| C | 4.28466200  | -0.85831800 | -0.18947200 |
| H | 4.54555400  | 0.19313000  | -0.27886700 |
| H | 5.09603300  | -1.52729900 | -0.47064900 |
| P | 2.57895800  | -1.43544200 | -0.63735800 |
| P | 1.27157000  | 0.24539100  | -1.12454900 |
| C | 2.90820700  | 2.52438300  | 0.63898100  |
| C | 2.58596600  | 2.84660200  | -0.62229500 |
| H | 2.23089700  | 2.70823100  | 1.46779700  |
| H | 3.86972100  | 2.07973500  | 0.87981300  |
| H | 3.27535700  | 2.69507100  | -1.44763600 |
| H | 1.64345200  | 3.33004300  | -0.86486300 |

### TS3 (L1)

|                                              |                             |
|----------------------------------------------|-----------------------------|
| Zero-point correction=                       | 0.097197 (Hartree/Particle) |
| Thermal correction to Energy=                | 0.116011                    |
| Thermal correction to Enthalpy=              | 0.116955                    |
| Thermal correction to Gibbs Free Energy=     | 0.045467                    |
| Sum of electronic and zero-point Energies=   | -1395.750663                |
| Sum of electronic and thermal Energies=      | -1395.731849                |
| Sum of electronic and thermal Enthalpies=    | -1395.730905                |
| Sum of electronic and thermal Free Energies= | -1395.802393                |

|     |             |             |             |
|-----|-------------|-------------|-------------|
| 0 1 |             |             |             |
| W   | -0.71849300 | 0.00251400  | 0.00000600  |
| C   | -0.17087400 | -1.98807000 | 0.00032800  |
| C   | -0.68199000 | -0.03713700 | -2.06424300 |
| C   | -2.66801100 | -0.54606300 | 0.00012200  |
| C   | -1.36703000 | 1.95629600  | -0.00032300 |
| C   | -0.68190600 | -0.03642100 | 2.06426800  |
| O   | 0.03653200  | -3.12524400 | 0.00049400  |
| O   | -0.65447700 | -0.07418800 | -3.21688600 |
| O   | -3.78762400 | -0.84324000 | 0.00018500  |
| O   | -1.74531600 | 3.04651100  | -0.00050600 |
| O   | -0.65433400 | -0.07307200 | 3.21692200  |
| C   | 4.78393800  | 0.25806300  | 0.68689100  |
| H   | 5.15240800  | -0.59339200 | 1.25169200  |
| H   | 4.55579300  | 1.15695000  | 1.24967500  |
| C   | 4.78400700  | 0.25768400  | -0.68702100 |
| H   | 4.55590500  | 1.15625500  | -1.25032700 |
| H   | 5.15251300  | -0.59408800 | -1.25131900 |
| P   | 2.70112200  | -0.57750300 | 0.00013700  |
| P   | 1.57919700  | 1.11456800  | -0.00026800 |

#### TS4 (L1)

|                                              |                             |
|----------------------------------------------|-----------------------------|
| Zero-point correction=                       | 0.097886 (Hartree/Particle) |
| Thermal correction to Energy=                | 0.115788                    |
| Thermal correction to Enthalpy=              | 0.116732                    |
| Thermal correction to Gibbs Free Energy=     | 0.048408                    |
| Sum of electronic and zero-point Energies=   | -1395.736545                |
| Sum of electronic and thermal Energies=      | -1395.718644                |
| Sum of electronic and thermal Enthalpies=    | -1395.717700                |
| Sum of electronic and thermal Free Energies= | -1395.786024                |

|     |             |             |             |
|-----|-------------|-------------|-------------|
| 0 1 |             |             |             |
| W   | 0.69548400  | -0.00513600 | -0.01713300 |
| C   | -0.07892200 | 0.20583500  | -1.90675800 |
| C   | 0.36448700  | -2.03177700 | -0.13698000 |
| C   | 2.57079100  | -0.20409800 | -0.75632000 |
| C   | 1.39021700  | -0.22350100 | 1.91114400  |
| C   | 0.98689800  | 2.02726400  | 0.13312700  |
| O   | -0.55309200 | 0.32110200  | -2.95488500 |
| O   | 0.15560700  | -3.16666100 | -0.19632300 |
| O   | 3.63949200  | -0.32247600 | -1.18844200 |
| O   | 1.78273600  | -0.34337100 | 2.99071800  |
| O   | 1.15583600  | 3.16688700  | 0.22057300  |
| C   | -3.34391600 | 1.19011500  | -0.26427600 |
| H   | -3.22330100 | 1.23457600  | -1.34426600 |
| H   | -3.21415600 | 2.16244300  | 0.20241800  |
| C   | -4.40282800 | 0.26418000  | 0.27440800  |
| H   | -4.71417300 | 0.49166000  | 1.29290700  |
| H   | -5.24619600 | 0.06354200  | -0.38962400 |
| P   | -3.00114000 | -0.93661900 | 0.04673700  |
| P   | -1.62772600 | 0.39101100  | 0.95374200  |

#### 11 (L2)

|                               |                             |
|-------------------------------|-----------------------------|
| Zero-point correction=        | 0.152601 (Hartree/Particle) |
| Thermal correction to Energy= | 0.173812                    |

|                                              |  |  |              |
|----------------------------------------------|--|--|--------------|
| Thermal correction to Enthalpy=              |  |  | 0.174756     |
| Thermal correction to Gibbs Free Energy=     |  |  | 0.097603     |
| Sum of electronic and zero-point Energies=   |  |  | -1474.035960 |
| Sum of electronic and thermal Energies=      |  |  | -1474.014749 |
| Sum of electronic and thermal Enthalpies=    |  |  | -1474.013805 |
| Sum of electronic and thermal Free Energies= |  |  | -1474.090958 |

0 1

|   |             |             |             |
|---|-------------|-------------|-------------|
| P | -1.57310800 | 0.87441000  | -0.00259600 |
| W | 0.83962200  | -0.08394000 | 0.00042900  |
| C | 0.35447700  | -2.09649600 | -0.04375000 |
| C | 0.78584600  | -0.12241100 | 2.06979400  |
| C | 2.77373200  | -0.65873100 | 0.00551900  |
| C | 1.50448200  | 1.87245200  | 0.04008400  |
| C | 0.81896700  | -0.04478100 | -2.06919800 |
| O | 0.17541100  | -3.22875100 | -0.07000700 |
| O | 0.75951400  | -0.14561400 | 3.21484400  |
| O | 3.87946000  | -0.97399000 | 0.01082300  |
| O | 1.90867800  | 2.94167800  | 0.06097600  |
| O | 0.81038900  | -0.02716500 | -3.21323900 |
| P | -3.57906400 | -0.08917500 | -0.00070800 |
| C | -1.97273500 | 2.50824900  | 0.75168400  |
| H | -2.92811800 | 2.60543100  | 1.25300900  |
| H | -1.15550700 | 3.00725500  | 1.25832500  |
| C | -1.97274000 | 2.50841100  | -0.75566800 |
| H | -2.92580200 | 2.60638600  | -1.25986000 |
| H | -1.15535200 | 3.00579000  | -1.26091500 |
| C | -3.18437000 | -1.74784300 | -0.74513200 |
| H | -2.23784600 | -1.86418400 | -1.25812600 |
| H | -4.01820200 | -2.21516000 | -1.25630900 |
| C | -3.18224200 | -1.74682300 | 0.74691300  |
| H | -2.23467900 | -1.86091300 | 1.25450600  |
| H | -4.01404400 | -2.21298400 | 1.25850400  |

### C<sub>2</sub>H<sub>4</sub> (L2)

|                                              |  |  |                             |
|----------------------------------------------|--|--|-----------------------------|
| Zero-point correction=                       |  |  | 0.050910 (Hartree/Particle) |
| Thermal correction to Energy=                |  |  | 0.053948                    |
| Thermal correction to Enthalpy=              |  |  | 0.054893                    |
| Thermal correction to Gibbs Free Energy=     |  |  | 0.029391                    |
| Sum of electronic and zero-point Energies=   |  |  | -78.573429                  |
| Sum of electronic and thermal Energies=      |  |  | -78.570390                  |
| Sum of electronic and thermal Enthalpies=    |  |  | -78.569446                  |
| Sum of electronic and thermal Free Energies= |  |  | -78.594947                  |

0 1

|   |             |             |            |
|---|-------------|-------------|------------|
| C | 0.00000000  | 0.66269600  | 0.00000000 |
| H | 0.92155700  | 1.23273500  | 0.00000000 |
| H | -0.92155500 | 1.23273600  | 0.00000000 |
| C | 0.00000000  | -0.66269600 | 0.00000000 |
| H | -0.92155700 | -1.23273500 | 0.00000000 |
| H | 0.92155500  | -1.23273600 | 0.00000000 |

### 3 (L2)

|                                          |  |  |                             |
|------------------------------------------|--|--|-----------------------------|
| Zero-point correction=                   |  |  | 0.098598 (Hartree/Particle) |
| Thermal correction to Energy=            |  |  | 0.116850                    |
| Thermal correction to Enthalpy=          |  |  | 0.117795                    |
| Thermal correction to Gibbs Free Energy= |  |  | 0.046885                    |



|                                              |              |
|----------------------------------------------|--------------|
| Sum of electronic and zero-point Energies=   | -1395.453657 |
| Sum of electronic and thermal Energies=      | -1395.435405 |
| Sum of electronic and thermal Enthalpies=    | -1395.434460 |
| Sum of electronic and thermal Free Energies= | -1395.505370 |

0 1

|   |             |             |             |
|---|-------------|-------------|-------------|
| W | 0.69275800  | -0.00475400 | 0.00001200  |
| C | 0.71163100  | 1.46669800  | 1.45894900  |
| C | 0.71166800  | 1.46433700  | -1.46131900 |
| C | 2.73693700  | -0.02254600 | 0.00002300  |
| C | 0.67165400  | -1.48223000 | -1.45952600 |
| C | 0.67173800  | -1.47987500 | 1.46194300  |
| O | 0.72983900  | 2.28012900  | 2.26217800  |
| O | 0.72991300  | 2.27649600  | -2.26582900 |
| O | 3.88263100  | -0.02941200 | -0.00004800 |
| O | 0.66525300  | -2.29531000 | -2.26139500 |
| O | 0.66538500  | -2.29168500 | 2.26509700  |
| C | -2.99759600 | 1.44972400  | 0.00027600  |
| H | -2.90414100 | 2.08664600  | -0.88109900 |
| H | -2.90415600 | 2.08630300  | 0.88190100  |
| C | -4.25846600 | 0.55629100  | 0.00007500  |
| H | -4.88575400 | 0.69870500  | 0.88138100  |
| H | -4.88577000 | 0.69910700  | -0.88115300 |
| P | -1.78913300 | 0.05066900  | -0.00000500 |
| P | -3.44778700 | -1.14767800 | -0.00029400 |

## 2a (L2)

|                                              |                             |
|----------------------------------------------|-----------------------------|
| Zero-point correction=                       | 0.096865 (Hartree/Particle) |
| Thermal correction to Energy=                | 0.115962                    |
| Thermal correction to Enthalpy=              | 0.116906                    |
| Thermal correction to Gibbs Free Energy=     | 0.044746                    |
| Sum of electronic and zero-point Energies=   | -1395.415057                |
| Sum of electronic and thermal Energies=      | -1395.395960                |
| Sum of electronic and thermal Enthalpies=    | -1395.395016                |
| Sum of electronic and thermal Free Energies= | -1395.467176                |

0 1

|   |             |             |             |
|---|-------------|-------------|-------------|
| W | 0.72550700  | -0.00343900 | -0.00006400 |
| C | 0.18892300  | -1.40325600 | -1.44338100 |
| C | 0.18933900  | -1.40324000 | 1.44342100  |
| C | 2.68051100  | -0.72545100 | -0.00022100 |
| C | 1.25571600  | 1.39816300  | 1.44230000  |
| C | 1.25544500  | 1.39802500  | -1.44267700 |
| O | -0.10788500 | -2.17519000 | -2.22958600 |
| O | -0.10722200 | -2.17521700 | 2.22967600  |
| O | 3.74792900  | -1.13325300 | -0.00019300 |
| O | 1.55428500  | 2.17372200  | 2.22504600  |
| O | 1.55381700  | 2.17346200  | -2.22561700 |
| C | -4.47619400 | 0.45686600  | -0.72463100 |
| H | -5.16165400 | -0.19483600 | -1.25205300 |
| H | -4.19638300 | 1.35743000  | -1.25236100 |
| C | -4.47605800 | 0.45652000  | 0.72554300  |
| H | -4.19614400 | 1.35683300  | 1.25364800  |
| H | -5.16141400 | -0.19543400 | 1.25278800  |
| P | -3.00766000 | -0.58320500 | 0.00007300  |
| P | -1.51270200 | 0.98030900  | 0.00032800  |

**4 (L2)**

|                                              |  |                             |
|----------------------------------------------|--|-----------------------------|
| Zero-point correction=                       |  | 0.043835 (Hartree/Particle) |
| Thermal correction to Energy=                |  | 0.059593                    |
| Thermal correction to Enthalpy=              |  | 0.060537                    |
| Thermal correction to Gibbs Free Energy=     |  | -0.003171                   |
| Sum of electronic and zero-point Energies=   |  | -1316.862734                |
| Sum of electronic and thermal Energies=      |  | -1316.846976                |
| Sum of electronic and thermal Enthalpies=    |  | -1316.846032                |
| Sum of electronic and thermal Free Energies= |  | -1316.909739                |

0 1

|   |             |             |             |
|---|-------------|-------------|-------------|
| P | -3.97944900 | 0.00016200  | 0.00018600  |
| P | -2.08856000 | 0.00029200  | 0.00021000  |
| W | 0.35600400  | 0.00005600  | 0.00002900  |
| C | 0.37638200  | 1.18099900  | 1.71278800  |
| C | 0.37597500  | 1.71280500  | -1.18092400 |
| C | 2.40155100  | -0.00051900 | -0.00045300 |
| C | 0.37507800  | -1.18086700 | -1.71273400 |
| C | 0.37554500  | -1.71272500 | 1.18093400  |
| O | 0.40393100  | 1.82795300  | 2.65116900  |
| O | 0.40310700  | 2.65114800  | -1.82795300 |
| O | 3.54476800  | -0.00121500 | -0.00073800 |
| O | 0.40186100  | -1.82790200 | -2.65108400 |
| O | 0.40241600  | -2.65112500 | 1.82789000  |

**TS1 (L2)**

|                                              |  |                             |
|----------------------------------------------|--|-----------------------------|
| Zero-point correction=                       |  | 0.149511 (Hartree/Particle) |
| Thermal correction to Energy=                |  | 0.171815                    |
| Thermal correction to Enthalpy=              |  | 0.172760                    |
| Thermal correction to Gibbs Free Energy=     |  | 0.092747                    |
| Sum of electronic and zero-point Energies=   |  | -1473.958780                |
| Sum of electronic and thermal Energies=      |  | -1473.936475                |
| Sum of electronic and thermal Enthalpies=    |  | -1473.935531                |
| Sum of electronic and thermal Free Energies= |  | -1474.015544                |

0 1

|   |             |             |             |
|---|-------------|-------------|-------------|
| P | 1.41488600  | 0.81605900  | 0.27912500  |
| W | -0.90341400 | -0.11973400 | -0.00842900 |
| C | -1.53118800 | 1.59585300  | -0.99239000 |
| C | -1.41905000 | 0.72599500  | 1.80438700  |
| C | -2.78052400 | -0.89500000 | -0.19438900 |
| C | -0.31777000 | -1.85624500 | 0.95759600  |
| C | -0.33421400 | -0.94736800 | -1.82480200 |
| O | -1.89016400 | 2.53533600  | -1.53693800 |
| O | -1.70328200 | 1.19710000  | 2.80823700  |
| O | -3.83809900 | -1.32689400 | -0.29495100 |
| O | -0.01062100 | -2.82312800 | 1.48687000  |
| O | -0.02409800 | -1.40520700 | -2.82422000 |
| P | 3.22884800  | 0.50718500  | -0.64298400 |
| C | 2.18820900  | 2.61587600  | -0.40567200 |
| H | 3.17258600  | 3.03074900  | -0.57144800 |
| H | 1.46150300  | 2.94202800  | -1.14017400 |
| C | 1.69707600  | 2.46552800  | 1.01614100  |
| H | 2.47698700  | 2.52701800  | 1.76680100  |

|   |            |             |             |
|---|------------|-------------|-------------|
| H | 0.79855400 | 3.01746700  | 1.28219600  |
| C | 4.30426300 | -1.59272600 | 0.86255900  |
| H | 3.80462400 | -1.46236400 | 1.81369500  |
| H | 5.33636400 | -1.27091000 | 0.81062200  |
| C | 3.69197100 | -2.16520200 | -0.18282600 |
| H | 2.67677900 | -2.53389700 | -0.11660900 |
| H | 4.20671600 | -2.33631700 | -1.11907600 |

### TS2 (L2)

|                                              |                             |
|----------------------------------------------|-----------------------------|
| Zero-point correction=                       | 0.149918 (Hartree/Particle) |
| Thermal correction to Energy=                | 0.172125                    |
| Thermal correction to Enthalpy=              | 0.173069                    |
| Thermal correction to Gibbs Free Energy=     | 0.094506                    |
| Sum of electronic and zero-point Energies=   | -1473.978746                |
| Sum of electronic and thermal Energies=      | -1473.956540                |
| Sum of electronic and thermal Enthalpies=    | -1473.955596                |
| Sum of electronic and thermal Free Energies= | -1474.034158                |

0 1

|   |             |             |             |
|---|-------------|-------------|-------------|
| W | 0.89821100  | -0.04670100 | 0.03168400  |
| C | 1.11040200  | 1.98511000  | 0.37816700  |
| C | 1.70549000  | 0.25253100  | -1.85681800 |
| C | 2.79486100  | -0.38044400 | 0.74973200  |
| C | 0.72802600  | -2.09176600 | -0.30013800 |
| C | 0.05302600  | -0.33031300 | 1.90478000  |
| O | 1.23683000  | 3.10721600  | 0.56265500  |
| O | 2.15806000  | 0.42743600  | -2.89136500 |
| O | 3.85093100  | -0.56775600 | 1.15345800  |
| O | 0.65849000  | -3.21919100 | -0.46779900 |
| O | -0.41552400 | -0.48661600 | 2.93598900  |
| C | -4.35175300 | -0.68293000 | -0.24441400 |
| H | -5.18033400 | -1.29706000 | -0.57733300 |
| H | -4.55493000 | 0.37854800  | -0.29948600 |
| C | -3.54958800 | -1.18038000 | 0.94658400  |
| H | -3.20900000 | -0.44533100 | 1.66304800  |
| H | -3.84753200 | -2.12098400 | 1.39512900  |
| P | -2.67051000 | -1.29054100 | -0.66939000 |
| P | -1.30847800 | 0.35227800  | -1.07203800 |
| C | -2.55416900 | 2.73877100  | -0.54194800 |
| C | -2.54562300 | 2.43491200  | 0.76216200  |
| H | -1.73962300 | 3.28246600  | -1.00260700 |
| H | -3.41154200 | 2.53755000  | -1.17022000 |
| H | -3.38821000 | 1.95004000  | 1.23857000  |
| H | -1.70594100 | 2.68292500  | 1.39755300  |

### TS3 (L2)

|                                              |                             |
|----------------------------------------------|-----------------------------|
| Zero-point correction=                       | 0.096155 (Hartree/Particle) |
| Thermal correction to Energy=                | 0.115134                    |
| Thermal correction to Enthalpy=              | 0.116079                    |
| Thermal correction to Gibbs Free Energy=     | 0.044273                    |
| Sum of electronic and zero-point Energies=   | -1395.407837                |
| Sum of electronic and thermal Energies=      | -1395.388857                |
| Sum of electronic and thermal Enthalpies=    | -1395.387913                |
| Sum of electronic and thermal Free Energies= | -1395.459719                |

0 1

|   |             |             |             |
|---|-------------|-------------|-------------|
| W | -0.70918700 | 0.00365900  | 0.00000200  |
| C | -0.18240200 | -2.00529500 | 0.00016800  |
| C | -0.68141300 | -0.04191200 | -2.07799800 |
| C | -2.67390600 | -0.53101900 | 0.00001400  |
| C | -1.36776400 | 1.96649800  | -0.00016700 |
| C | -0.68144700 | -0.04157100 | 2.07801600  |
| O | 0.00288000  | -3.13553800 | 0.00025400  |
| O | -0.66387200 | -0.08525800 | -3.21970300 |
| O | -3.78695300 | -0.81247900 | 0.00001900  |
| O | -1.75835700 | 3.04103000  | -0.00026400 |
| O | -0.66392000 | -0.08473200 | 3.21972800  |
| C | 4.75051500  | 0.26626200  | 0.68510100  |
| H | 5.12810700  | -0.57894200 | 1.24541800  |
| H | 4.51886200  | 1.15994200  | 1.24600200  |
| C | 4.75047900  | 0.26619000  | -0.68518700 |
| H | 4.51880800  | 1.15981600  | -1.24616600 |
| H | 5.12804900  | -0.57906900 | -1.24543600 |
| P | 2.71831600  | -0.57490700 | 0.00004800  |
| P | 1.59258100  | 1.10213300  | -0.00004400 |

#### TS4 (L2)

|                                              |                             |
|----------------------------------------------|-----------------------------|
| Zero-point correction=                       | 0.096662 (Hartree/Particle) |
| Thermal correction to Energy=                | 0.114790                    |
| Thermal correction to Enthalpy=              | 0.115735                    |
| Thermal correction to Gibbs Free Energy=     | 0.046455                    |
| Sum of electronic and zero-point Energies=   | -1395.393524                |
| Sum of electronic and thermal Energies=      | -1395.375395                |
| Sum of electronic and thermal Enthalpies=    | -1395.374451                |
| Sum of electronic and thermal Free Energies= | -1395.443731                |

0 1

|   |             |             |             |
|---|-------------|-------------|-------------|
| W | 0.68878000  | -0.00387300 | -0.01294200 |
| C | -0.02460700 | 0.15222500  | -1.94658600 |
| C | 0.41459900  | -2.05483200 | -0.10574400 |
| C | 2.59323000  | -0.18370600 | -0.69963100 |
| C | 1.35237400  | -0.17724900 | 1.94293700  |
| C | 0.95760000  | 2.04572500  | 0.09541100  |
| O | -0.43710900 | 0.23309500  | -3.01181600 |
| O | 0.26148800  | -3.18798700 | -0.15530100 |
| O | 3.66703300  | -0.28595000 | -1.09550700 |
| O | 1.72852600  | -0.27279600 | 3.01950300  |
| O | 1.11925900  | 3.17748500  | 0.15541000  |
| C | -3.35273100 | 1.16505100  | -0.29549200 |
| H | -3.23554100 | 1.18292500  | -1.37255000 |
| H | -3.23065400 | 2.14685900  | 0.14259000  |
| C | -4.41766000 | 0.25531500  | 0.25905400  |
| H | -4.72250000 | 0.50111100  | 1.27051200  |
| H | -5.26025000 | 0.04871500  | -0.39731700 |
| P | -3.02762500 | -0.93605500 | 0.04903500  |
| P | -1.66378700 | 0.39478900  | 0.91872800  |

#### 11 (L3)

|                                          |                             |
|------------------------------------------|-----------------------------|
| Zero-point correction=                   | 0.155486 (Hartree/Particle) |
| Thermal correction to Energy=            | 0.176094                    |
| Thermal correction to Enthalpy=          | 0.177038                    |
| Thermal correction to Gibbs Free Energy= | 0.102710                    |

|                                              |              |
|----------------------------------------------|--------------|
| Sum of electronic and zero-point Energies=   | -1473.767345 |
| Sum of electronic and thermal Energies=      | -1473.746738 |
| Sum of electronic and thermal Enthalpies=    | -1473.745793 |
| Sum of electronic and thermal Free Energies= | -1473.820122 |

0 1

|   |             |             |             |
|---|-------------|-------------|-------------|
| P | -1.55319300 | 0.86642600  | -0.00005900 |
| W | 0.80690200  | -0.07768700 | 0.00004600  |
| C | 0.38813200  | -2.09391100 | 0.00012400  |
| C | 0.73960000  | -0.07372600 | 2.05780200  |
| C | 2.74400700  | -0.61705000 | 0.00029700  |
| C | 1.44968700  | 1.87297300  | -0.00040000 |
| C | 0.73987700  | -0.07457100 | -2.05766300 |
| O | 0.25310800  | -3.22684400 | 0.00006900  |
| O | 0.69093300  | -0.07178100 | 3.19635700  |
| O | 3.85183700  | -0.90629400 | 0.00038200  |
| O | 1.84259100  | 2.94372500  | -0.00057000 |
| O | 0.69132100  | -0.07321900 | -3.19623400 |
| P | -3.49840400 | -0.14907000 | 0.00006800  |
| C | -1.94632400 | 2.48371800  | 0.75364100  |
| H | -2.90091400 | 2.59153000  | 1.25306000  |
| H | -1.12368300 | 2.97771500  | 1.25509200  |
| C | -1.94629900 | 2.48336400  | -0.75454300 |
| H | -2.90093200 | 2.59085400  | -1.25396000 |
| H | -1.12373900 | 2.97721500  | -1.25627100 |
| C | -2.99108900 | -1.76296900 | -0.74497400 |
| H | -2.03549800 | -1.80929400 | -1.25197900 |
| H | -3.78735200 | -2.29252500 | -1.25293600 |
| C | -2.99101200 | -1.76287000 | 0.74532600  |
| H | -2.03533000 | -1.80901300 | 1.25218600  |
| H | -3.78711700 | -2.29241400 | 1.25354000  |

### C<sub>2</sub>H<sub>4</sub> (L3)

|                                              |                             |
|----------------------------------------------|-----------------------------|
| Zero-point correction=                       | 0.051319 (Hartree/Particle) |
| Thermal correction to Energy=                | 0.054351                    |
| Thermal correction to Enthalpy=              | 0.055295                    |
| Thermal correction to Gibbs Free Energy=     | 0.029806                    |
| Sum of electronic and zero-point Energies=   | -78.538299                  |
| Sum of electronic and thermal Energies=      | -78.535268                  |
| Sum of electronic and thermal Enthalpies=    | -78.534324                  |
| Sum of electronic and thermal Free Energies= | -78.559813                  |

0 1

|   |             |             |            |
|---|-------------|-------------|------------|
| C | 0.00000000  | 0.66123900  | 0.00000000 |
| H | 0.92300100  | 1.22935100  | 0.00000000 |
| H | -0.92300000 | 1.22935200  | 0.00000000 |
| C | 0.00000000  | -0.66123900 | 0.00000000 |
| H | -0.92300100 | -1.22935100 | 0.00000000 |
| H | 0.92300000  | -1.22935200 | 0.00000000 |

### 3 (L3)

|                                            |                             |
|--------------------------------------------|-----------------------------|
| Zero-point correction=                     | 0.100082 (Hartree/Particle) |
| Thermal correction to Energy=              | 0.118112                    |
| Thermal correction to Enthalpy=            | 0.119056                    |
| Thermal correction to Gibbs Free Energy=   | 0.049252                    |
| Sum of electronic and zero-point Energies= | -1395.199591                |

|                                              |              |
|----------------------------------------------|--------------|
| Sum of electronic and thermal Energies=      | -1395.181562 |
| Sum of electronic and thermal Enthalpies=    | -1395.180618 |
| Sum of electronic and thermal Free Energies= | -1395.250421 |

0 1

|   |             |             |             |
|---|-------------|-------------|-------------|
| W | -0.68442600 | -0.00554800 | 0.00014200  |
| C | -0.67816900 | 1.53253600  | -1.36840200 |
| C | -0.67530800 | 1.37424700  | 1.52799000  |
| C | -2.72118900 | 0.00414100  | 0.00499800  |
| C | -0.66593200 | -1.55066400 | 1.37073100  |
| C | -0.68209800 | -1.39262600 | -1.53016300 |
| O | -0.67461100 | 2.38691800  | -2.12170400 |
| O | -0.67061200 | 2.14193400  | 2.36999200  |
| O | -3.86204400 | 0.01415300  | 0.00868300  |
| O | -0.65614400 | -2.40161300 | 2.12720300  |
| O | -0.68139300 | -2.15927200 | -2.37296200 |
| C | 2.94113800  | 1.43461500  | -0.01137700 |
| H | 2.84152500  | 2.07452500  | 0.86767800  |
| H | 2.84274600  | 2.06520900  | -0.89845200 |
| C | 4.20461000  | 0.54741500  | -0.00445600 |
| H | 4.83070000  | 0.69075300  | -0.88844100 |
| H | 4.82815400  | 0.70202800  | 0.87632200  |
| P | 1.75802700  | 0.03412900  | -0.00524800 |
| P | 3.39694200  | -1.14592100 | 0.00570000  |

**2a (L3)**

|                                              |                             |
|----------------------------------------------|-----------------------------|
| Zero-point correction=                       | 0.098476 (Hartree/Particle) |
| Thermal correction to Energy=                | 0.117327                    |
| Thermal correction to Enthalpy=              | 0.118271                    |
| Thermal correction to Gibbs Free Energy=     | 0.046391                    |
| Sum of electronic and zero-point Energies=   | -1395.156213                |
| Sum of electronic and thermal Energies=      | -1395.137362                |
| Sum of electronic and thermal Enthalpies=    | -1395.136417                |
| Sum of electronic and thermal Free Energies= | -1395.208298                |

0 1

|   |             |             |             |
|---|-------------|-------------|-------------|
| W | 0.71596900  | -0.00553100 | -0.00208100 |
| C | 0.11277000  | -1.32465100 | -1.48132600 |
| C | 0.22397600  | -1.48007900 | 1.37080200  |
| C | 2.66643900  | -0.72733000 | -0.06214300 |
| C | 1.27759300  | 1.33691700  | 1.46332600  |
| C | 1.21237700  | 1.44229000  | -1.40213500 |
| O | -0.22350900 | -2.04968900 | -2.28886700 |
| O | -0.06042900 | -2.29419000 | 2.10988500  |
| O | 3.73134200  | -1.12454300 | -0.08849500 |
| O | 1.58598000  | 2.08951700  | 2.25801100  |
| O | 1.48395900  | 2.24287000  | -2.16094600 |
| C | -4.38449300 | 0.58029300  | -0.66635600 |
| H | -5.08970000 | 0.04607700  | -1.29098200 |
| H | -4.09508900 | 1.55506700  | -1.03435200 |
| C | -4.41221600 | 0.35056500  | 0.77456500  |
| H | -4.14137500 | 1.16148600  | 1.43671000  |
| H | -5.14116900 | -0.34429000 | 1.17313200  |
| P | -2.98323100 | -0.56342600 | -0.08006200 |
| P | -1.47222200 | 0.96417600  | 0.16355400  |

#### 4 (L3)

|                                              |  |  |                             |
|----------------------------------------------|--|--|-----------------------------|
| Zero-point correction=                       |  |  | 0.044708 (Hartree/Particle) |
| Thermal correction to Energy=                |  |  | 0.060380                    |
| Thermal correction to Enthalpy=              |  |  | 0.061324                    |
| Thermal correction to Gibbs Free Energy=     |  |  | -0.002399                   |
| Sum of electronic and zero-point Energies=   |  |  | -1316.625270                |
| Sum of electronic and thermal Energies=      |  |  | -1316.609597                |
| Sum of electronic and thermal Enthalpies=    |  |  | -1316.608653                |
| Sum of electronic and thermal Free Energies= |  |  | -1316.672376                |

0 1

|   |             |             |             |
|---|-------------|-------------|-------------|
| P | -3.93175000 | 0.00017300  | -0.00004200 |
| P | -2.06206600 | 0.00018300  | -0.00025500 |
| W | 0.34855300  | 0.00000900  | -0.00002300 |
| C | 0.37095600  | 0.87287900  | -1.87503700 |
| C | 0.36990900  | -1.87507000 | -0.87283800 |
| C | 2.38684900  | -0.00023000 | 0.00012800  |
| C | 0.37012100  | -0.87291000 | 1.87503100  |
| C | 0.37073300  | 1.87501800  | 0.87295300  |
| O | 0.39751800  | 1.35379000  | -2.90355900 |
| O | 0.39663300  | -2.90365200 | -1.35361700 |
| O | 3.52503600  | -0.00040700 | 0.00027200  |
| O | 0.39668900  | -1.35376500 | 2.90357700  |
| O | 0.39698900  | 2.90352000  | 1.35391600  |

#### TS1 (L3)

|                                              |  |  |                             |
|----------------------------------------------|--|--|-----------------------------|
| Zero-point correction=                       |  |  | 0.151684 (Hartree/Particle) |
| Thermal correction to Energy=                |  |  | 0.173649                    |
| Thermal correction to Enthalpy=              |  |  | 0.174593                    |
| Thermal correction to Gibbs Free Energy=     |  |  | 0.096176                    |
| Sum of electronic and zero-point Energies=   |  |  | -1473.676280                |
| Sum of electronic and thermal Energies=      |  |  | -1473.654315                |
| Sum of electronic and thermal Enthalpies=    |  |  | -1473.653371                |
| Sum of electronic and thermal Free Energies= |  |  | -1473.731788                |

0 1

|   |             |             |             |
|---|-------------|-------------|-------------|
| P | 1.39569200  | 0.83446400  | 0.29520700  |
| W | -0.85975500 | -0.11021400 | -0.01493900 |
| C | -0.31174700 | -1.74748200 | 1.10899800  |
| C | -0.19173500 | -1.05825400 | -1.72402500 |
| C | -2.71544300 | -0.91657300 | -0.22653600 |
| C | -1.43036300 | 1.52025300  | -1.14621700 |
| C | -1.45148900 | 0.86825900  | 1.69037900  |
| O | -0.01738300 | -2.65657200 | 1.73013500  |
| O | 0.18039900  | -1.58195300 | -2.66267800 |
| O | -3.75825400 | -1.36681500 | -0.34082300 |
| O | -1.74318800 | 2.42164500  | -1.76773400 |
| O | -1.76837400 | 1.41927800  | 2.63681700  |
| P | 3.18745300  | 0.54420200  | -0.61595300 |
| C | 2.12426100  | 2.58098500  | -0.37864600 |
| H | 3.10037700  | 3.01181700  | -0.56109200 |
| H | 1.37958700  | 2.92387500  | -1.08862900 |
| C | 1.67435200  | 2.44773100  | 1.06649800  |
| H | 2.48052500  | 2.51600200  | 1.78742800  |
| H | 0.77878400  | 2.99483100  | 1.34804300  |
| C | 3.89595400  | -1.78016800 | 0.89385500  |

|   |            |             |             |
|---|------------|-------------|-------------|
| H | 3.31681300 | -1.61671400 | 1.79463400  |
| H | 4.96184400 | -1.60072100 | 0.96133500  |
| C | 3.32854700 | -2.21427000 | -0.23097900 |
| H | 2.26862300 | -2.43023800 | -0.28685200 |
| H | 3.90853600 | -2.41057900 | -1.12387300 |

### TS2 (L3)

|                                              |                             |
|----------------------------------------------|-----------------------------|
| Zero-point correction=                       | 0.152614 (Hartree/Particle) |
| Thermal correction to Energy=                | 0.174253                    |
| Thermal correction to Enthalpy=              | 0.175197                    |
| Thermal correction to Gibbs Free Energy=     | 0.098757                    |
| Sum of electronic and zero-point Energies=   | -1473.695554                |
| Sum of electronic and thermal Energies=      | -1473.673915                |
| Sum of electronic and thermal Enthalpies=    | -1473.672971                |
| Sum of electronic and thermal Free Energies= | -1473.749412                |

0 1

|   |             |             |             |
|---|-------------|-------------|-------------|
| W | 0.87300700  | -0.04408600 | 0.03026200  |
| C | 1.00241900  | 1.99273600  | 0.32084300  |
| C | 1.74779600  | 0.22222100  | -1.82148700 |
| C | 2.74636700  | -0.29647600 | 0.83152000  |
| C | 0.76035600  | -2.09505400 | -0.22879600 |
| C | -0.03328600 | -0.29542100 | 1.86826300  |
| O | 1.07063100  | 3.11968800  | 0.47273000  |
| O | 2.23471600  | 0.38126000  | -2.83729300 |
| O | 3.78857600  | -0.43620600 | 1.27246900  |
| O | 0.70683600  | -3.22362700 | -0.35449600 |
| O | -0.53150600 | -0.43275300 | 2.88279500  |
| C | -4.24317100 | -0.63986700 | -0.25303300 |
| H | -5.10716100 | -1.23753900 | -0.51797000 |
| H | -4.40167700 | 0.42484800  | -0.36505900 |
| C | -3.41720500 | -1.09922800 | 0.93339100  |
| H | -3.02526200 | -0.33765300 | 1.59361000  |
| H | -3.73724500 | -1.99921000 | 1.44503800  |
| P | -2.60919400 | -1.33030500 | -0.69333300 |
| P | -1.24233000 | 0.27364400  | -1.15114500 |
| C | -2.48375900 | 2.69810200  | -0.52255300 |
| C | -2.52381000 | 2.32430800  | 0.75480200  |
| H | -1.61767900 | 3.19559400  | -0.94133500 |
| H | -3.33672900 | 2.57906000  | -1.17890200 |
| H | -3.41130200 | 1.87906700  | 1.18735200  |
| H | -1.68088400 | 2.47331300  | 1.41773100  |

### TS3 (L3)

|                                              |                             |
|----------------------------------------------|-----------------------------|
| Zero-point correction=                       | 0.097495 (Hartree/Particle) |
| Thermal correction to Energy=                | 0.116349                    |
| Thermal correction to Enthalpy=              | 0.117293                    |
| Thermal correction to Gibbs Free Energy=     | 0.044522                    |
| Sum of electronic and zero-point Energies=   | -1395.141743                |
| Sum of electronic and thermal Energies=      | -1395.122889                |
| Sum of electronic and thermal Enthalpies=    | -1395.121944                |
| Sum of electronic and thermal Free Energies= | -1395.194716                |

0 1

|   |            |             |             |
|---|------------|-------------|-------------|
| W | 0.68704200 | -0.00574500 | -0.00018700 |
| C | 0.16637300 | 1.99135400  | 0.01742600  |



|   |             |             |             |
|---|-------------|-------------|-------------|
| C | 0.62971600  | 0.07410700  | -2.06359200 |
| C | 2.63079800  | 0.54479400  | -0.00211000 |
| C | 1.39594600  | -1.94193800 | -0.01851200 |
| C | 0.64505400  | 0.04007400  | 2.06430700  |
| O | -0.00660200 | 3.11953500  | 0.02746200  |
| O | 0.58799700  | 0.14387700  | -3.19930700 |
| O | 3.73851900  | 0.83132200  | -0.00328200 |
| O | 1.82370600  | -2.99696700 | -0.02927400 |
| O | 0.61161300  | 0.09045800  | 3.20104900  |
| C | -4.67353100 | -0.21684200 | 0.68275900  |
| H | -5.00712700 | 0.65901800  | 1.22598700  |
| H | -4.47710900 | -1.10930700 | 1.26085700  |
| C | -4.67169700 | -0.24310500 | -0.67946700 |
| H | -4.47309300 | -1.15803800 | -1.22076400 |
| H | -5.00312700 | 0.61027600  | -1.25800600 |
| P | -2.60814800 | 0.53047900  | -0.00474500 |
| P | -1.56908500 | -1.16869700 | 0.00659400  |

### TS4 (L3)

|                                              |                             |
|----------------------------------------------|-----------------------------|
| Zero-point correction=                       | 0.097995 (Hartree/Particle) |
| Thermal correction to Energy=                | 0.115995                    |
| Thermal correction to Enthalpy=              | 0.116939                    |
| Thermal correction to Gibbs Free Energy=     | 0.046556                    |
| Sum of electronic and zero-point Energies=   | -1395.138642                |
| Sum of electronic and thermal Energies=      | -1395.120642                |
| Sum of electronic and thermal Enthalpies=    | -1395.119697                |
| Sum of electronic and thermal Free Energies= | -1395.190081                |

0 1

|   |             |             |             |
|---|-------------|-------------|-------------|
| W | 0.66939600  | -0.00605600 | -0.01141800 |
| C | -0.11136400 | 0.08740800  | -1.90766200 |
| C | 0.47445100  | -2.05764300 | -0.05470900 |
| C | 2.54158500  | -0.13152700 | -0.75367000 |
| C | 1.40022700  | -0.11173700 | 1.91278500  |
| C | 0.86791200  | 2.04113000  | 0.02731900  |
| O | -0.56356300 | 0.13916900  | -2.95448200 |
| O | 0.36120100  | -3.19172600 | -0.08267700 |
| O | 3.60247000  | -0.19856200 | -1.18027500 |
| O | 1.81727800  | -0.16979900 | 2.97207400  |
| O | 0.99088300  | 3.17505300  | 0.04249300  |
| C | -3.18153400 | 1.14517700  | -0.22546700 |
| H | -3.02541500 | 1.20447300  | -1.29800000 |
| H | -3.10486500 | 2.12642200  | 0.22887400  |
| C | -4.32805700 | 0.25980600  | 0.23850100  |
| H | -4.65470100 | 0.48756500  | 1.24739100  |
| H | -5.15032000 | 0.13254300  | -0.46063500 |
| P | -2.96991400 | -0.93208900 | 0.02725300  |
| P | -1.64644800 | 0.33664500  | 0.99459000  |

### 11 (L4)

|                                            |                             |
|--------------------------------------------|-----------------------------|
| Zero-point correction=                     | 0.153433 (Hartree/Particle) |
| Thermal correction to Energy=              | 0.174497                    |
| Thermal correction to Enthalpy=            | 0.175441                    |
| Thermal correction to Gibbs Free Energy=   | 0.098781                    |
| Sum of electronic and zero-point Energies= | -1473.947482                |

|                                              |              |
|----------------------------------------------|--------------|
| Sum of electronic and thermal Energies=      | -1473.926418 |
| Sum of electronic and thermal Enthalpies=    | -1473.925474 |
| Sum of electronic and thermal Free Energies= | -1474.002134 |

0 1

|   |             |             |             |
|---|-------------|-------------|-------------|
| P | -1.57401500 | 0.85198000  | 0.00251100  |
| W | 0.82246700  | -0.07343200 | 0.00230300  |
| C | 0.39612900  | -2.08871000 | -0.21995200 |
| C | 0.68201000  | -0.28484600 | 2.05537300  |
| C | 2.77190800  | -0.58350700 | 0.02351800  |
| C | 1.37999400  | 1.90254500  | 0.21228300  |
| C | 0.83257500  | 0.13528300  | -2.05576500 |
| O | 0.24042800  | -3.21988000 | -0.34550500 |
| O | 0.58712200  | -0.41001100 | 3.19233800  |
| O | 3.89205200  | -0.85304700 | 0.03926400  |
| O | 1.69757500  | 3.00056500  | 0.32534200  |
| O | 0.82153500  | 0.25510100  | -3.19710800 |
| P | -3.50639400 | -0.19465100 | 0.03463200  |
| C | -2.00113600 | 2.46541300  | 0.74087900  |
| H | -2.95602000 | 2.54355900  | 1.24439500  |
| H | -1.19681300 | 2.98453400  | 1.24540100  |
| C | -2.00254500 | 2.45422900  | -0.75713200 |
| H | -2.95626400 | 2.53095100  | -1.26291700 |
| H | -1.19333700 | 2.95970800  | -1.26893700 |
| C | -2.96554900 | -1.75438100 | -0.78636400 |
| H | -2.03119100 | -1.73256100 | -1.33385200 |
| H | -3.75458900 | -2.29656700 | -1.29087300 |
| C | -2.90796700 | -1.80949000 | 0.69398600  |
| H | -1.93284000 | -1.82692600 | 1.16728300  |
| H | -3.65755700 | -2.38967500 | 1.21631200  |

### C<sub>2</sub>H<sub>4</sub> (L4)

|                                              |                             |
|----------------------------------------------|-----------------------------|
| Zero-point correction=                       | 0.050994 (Hartree/Particle) |
| Thermal correction to Energy=                | 0.054039                    |
| Thermal correction to Enthalpy=              | 0.054983                    |
| Thermal correction to Gibbs Free Energy=     | 0.029480                    |
| Sum of electronic and zero-point Energies=   | -78.551608                  |
| Sum of electronic and thermal Energies=      | -78.548563                  |
| Sum of electronic and thermal Enthalpies=    | -78.547619                  |
| Sum of electronic and thermal Free Energies= | -78.573121                  |

0 1

|   |             |             |            |
|---|-------------|-------------|------------|
| C | 0.00000000  | 0.66066300  | 0.00000000 |
| H | 0.91899700  | 1.23364900  | 0.00000000 |
| H | -0.91899500 | 1.23365000  | 0.00000000 |
| C | 0.00000000  | -0.66066300 | 0.00000000 |
| H | -0.91899700 | -1.23364900 | 0.00000000 |
| H | 0.91899500  | -1.23365000 | 0.00000000 |

### 3 (L4)

|                                            |                             |
|--------------------------------------------|-----------------------------|
| Zero-point correction=                     | 0.099278 (Hartree/Particle) |
| Thermal correction to Energy=              | 0.117567                    |
| Thermal correction to Enthalpy=            | 0.118511                    |
| Thermal correction to Gibbs Free Energy=   | 0.047996                    |
| Sum of electronic and zero-point Energies= | -1395.363441                |

|                                              |  |  |              |
|----------------------------------------------|--|--|--------------|
| Sum of electronic and thermal Energies=      |  |  | -1395.345151 |
| Sum of electronic and thermal Enthalpies=    |  |  | -1395.344207 |
| Sum of electronic and thermal Free Energies= |  |  | -1395.414722 |

0 1

|   |             |             |             |
|---|-------------|-------------|-------------|
| W | 0.69450400  | -0.00786000 | 0.00000500  |
| C | 0.65305200  | 1.46864200  | 1.45099700  |
| C | 0.65324500  | 1.46756600  | -1.45209500 |
| C | 2.73997400  | 0.03477000  | 0.00004900  |
| C | 0.69479600  | -1.49054600 | -1.45399500 |
| C | 0.69488100  | -1.48946700 | 1.45511100  |
| O | 0.62177800  | 2.29141500  | 2.24883100  |
| O | 0.62216700  | 2.28968000  | -2.25061400 |
| O | 3.88789700  | 0.06551300  | 0.00007800  |
| O | 0.68747100  | -2.30978400 | -2.25382500 |
| O | 0.68760700  | -2.30817000 | 2.25548800  |
| C | -2.93456900 | 1.42138000  | 0.00012600  |
| H | -2.82894700 | 2.06137800  | -0.87708600 |
| H | -2.82892600 | 2.06118500  | 0.87747700  |
| C | -4.19673300 | 0.55465100  | 0.00005100  |
| H | -4.82617200 | 0.71035100  | 0.87662500  |
| H | -4.82617300 | 0.71051400  | -0.87649300 |
| P | -1.76176900 | 0.01762300  | -0.00001800 |
| P | -3.43598700 | -1.15049100 | -0.00011900 |

## 2a (L4)

|                                              |  |  |                             |
|----------------------------------------------|--|--|-----------------------------|
| Zero-point correction=                       |  |  | 0.097165 (Hartree/Particle) |
| Thermal correction to Energy=                |  |  | 0.116293                    |
| Thermal correction to Enthalpy=              |  |  | 0.117237                    |
| Thermal correction to Gibbs Free Energy=     |  |  | 0.044614                    |
| Sum of electronic and zero-point Energies=   |  |  | -1395.327293                |
| Sum of electronic and thermal Energies=      |  |  | -1395.308165                |
| Sum of electronic and thermal Enthalpies=    |  |  | -1395.307221                |
| Sum of electronic and thermal Free Energies= |  |  | -1395.379843                |

0 1

|   |             |             |             |
|---|-------------|-------------|-------------|
| W | 0.72568500  | -0.00992400 | -0.00001100 |
| C | 0.09687600  | -1.38465700 | -1.42936200 |
| C | 0.09724800  | -1.38528200 | 1.42890000  |
| C | 2.64461700  | -0.82195800 | -0.00032000 |
| C | 1.30324900  | 1.38618100  | 1.42834700  |
| C | 1.30290500  | 1.38673400  | -1.42798100 |
| O | -0.27240500 | -2.14061200 | -2.20470400 |
| O | -0.27149600 | -2.14175500 | 2.20399100  |
| O | 3.69168600  | -1.28678800 | -0.00044000 |
| O | 1.61905500  | 2.16805300  | 2.20218400  |
| O | 1.61872800  | 2.16876800  | -2.20164500 |
| C | -4.38455100 | 0.48366900  | -0.72415400 |
| H | -5.08042700 | -0.15674600 | -1.25170000 |
| H | -4.10674800 | 1.38605400  | -1.25018000 |
| C | -4.38446800 | 0.48240400  | 0.72501700  |
| H | -4.10659700 | 1.38386700  | 1.25258600  |
| H | -5.08030600 | -0.15892000 | 1.25150900  |
| P | -2.95320800 | -0.53947700 | -0.00053400 |
| P | -1.47788900 | 1.02322600  | 0.00059000  |

**4 (L4)**

|                                              |  |  |                             |
|----------------------------------------------|--|--|-----------------------------|
| Zero-point correction=                       |  |  | 0.043685 (Hartree/Particle) |
| Thermal correction to Energy=                |  |  | 0.059539                    |
| Thermal correction to Enthalpy=              |  |  | 0.060484                    |
| Thermal correction to Gibbs Free Energy=     |  |  | -0.003771                   |
| Sum of electronic and zero-point Energies=   |  |  | -1316.785283                |
| Sum of electronic and thermal Energies=      |  |  | -1316.769429                |
| Sum of electronic and thermal Enthalpies=    |  |  | -1316.768485                |
| Sum of electronic and thermal Free Energies= |  |  | -1316.832740                |

0 1

|   |             |             |             |
|---|-------------|-------------|-------------|
| P | -3.95342600 | 0.00024300  | 0.00049600  |
| P | -2.06134700 | 0.00076800  | 0.00089300  |
| W | 0.35444300  | 0.00002300  | 0.00002000  |
| C | 0.36953100  | 0.20020600  | 2.06998300  |
| C | 0.36913000  | 2.06997000  | -0.20025900 |
| C | 2.40421900  | -0.00102200 | -0.00134900 |
| C | 0.36684100  | -0.20015100 | -2.06992100 |
| C | 0.36733100  | -2.06993400 | 0.20010100  |
| O | 0.38751700  | 0.30908900  | 3.20767100  |
| O | 0.38626400  | 3.20767200  | -0.30912600 |
| O | 3.54984000  | -0.00140100 | -0.00173700 |
| O | 0.38363300  | -0.30914300 | -3.20761900 |
| O | 0.38405300  | -3.20763100 | 0.30910400  |

**TS1 (L4)**

|                                              |  |  |                             |
|----------------------------------------------|--|--|-----------------------------|
| Zero-point correction=                       |  |  | 0.150333 (Hartree/Particle) |
| Thermal correction to Energy=                |  |  | 0.172211                    |
| Thermal correction to Enthalpy=              |  |  | 0.173155                    |
| Thermal correction to Gibbs Free Energy=     |  |  | 0.096245                    |
| Sum of electronic and zero-point Energies=   |  |  | -1473.859764                |
| Sum of electronic and thermal Energies=      |  |  | -1473.837887                |
| Sum of electronic and thermal Enthalpies=    |  |  | -1473.836943                |
| Sum of electronic and thermal Free Energies= |  |  | -1473.913852                |

0 1

|   |             |             |             |
|---|-------------|-------------|-------------|
| P | 1.39813600  | 0.81363700  | 0.29615300  |
| W | -0.88531200 | -0.12107200 | -0.01875800 |
| C | -0.30809200 | -1.82023400 | 1.01794000  |
| C | -0.23404900 | -0.99742900 | -1.78252700 |
| C | -2.76250300 | -0.88642200 | -0.25103800 |
| C | -1.41114200 | 1.60656800  | -1.03646100 |
| C | -1.43033000 | 0.77985500  | 1.75597800  |
| O | 0.01790700  | -2.75852800 | 1.59247700  |
| O | 0.14934000  | -1.48426700 | -2.74616300 |
| O | -3.82391900 | -1.30770800 | -0.38047200 |
| O | -1.67927500 | 2.57752300  | -1.58570000 |
| O | -1.71057000 | 1.29344500  | 2.74361700  |
| P | 3.20888400  | 0.52588000  | -0.59411200 |
| C | 2.11985000  | 2.52041400  | -0.40953900 |
| H | 3.08817400  | 2.96314700  | -0.60754400 |
| H | 1.38224400  | 2.83648800  | -1.14027900 |
| C | 1.65969000  | 2.44792700  | 1.03047300  |
| H | 2.45944700  | 2.54069000  | 1.75452700  |
| H | 0.76551200  | 3.01042800  | 1.28645000  |
| C | 3.97028300  | -1.70398000 | 0.92006000  |
| H | 3.36790500  | -1.54823200 | 1.80648900  |

|   |            |             |             |
|---|------------|-------------|-------------|
| H | 5.02820000 | -1.49811900 | 1.01799100  |
| C | 3.43908500 | -2.15526500 | -0.21964000 |
| H | 2.38909000 | -2.40475000 | -0.30417000 |
| H | 4.04257700 | -2.34536600 | -1.09753200 |

#### TS2 (L4)

|                                              |  |  |                             |
|----------------------------------------------|--|--|-----------------------------|
| Zero-point correction=                       |  |  | 0.150645 (Hartree/Particle) |
| Thermal correction to Energy=                |  |  | 0.172538                    |
| Thermal correction to Enthalpy=              |  |  | 0.173483                    |
| Thermal correction to Gibbs Free Energy=     |  |  | 0.096415                    |
| Sum of electronic and zero-point Energies=   |  |  | -1473.880007                |
| Sum of electronic and thermal Energies=      |  |  | -1473.858113                |
| Sum of electronic and thermal Enthalpies=    |  |  | -1473.857169                |
| Sum of electronic and thermal Free Energies= |  |  | -1473.934237                |

0 1

|   |             |             |             |
|---|-------------|-------------|-------------|
| W | -0.88687100 | -0.05112700 | -0.03471600 |
| C | -1.14578800 | 1.99927800  | -0.13421000 |
| C | -1.77168700 | -0.00617100 | 1.84364700  |
| C | -2.73088800 | -0.39239200 | -0.85916600 |
| C | -0.56848400 | -2.10031100 | 0.08511000  |
| C | 0.04034600  | -0.07989100 | -1.88707800 |
| O | -1.26750100 | 3.14000500  | -0.17690000 |
| O | -2.26820500 | 0.02793200  | 2.87535600  |
| O | -3.76299000 | -0.58546000 | -1.32719000 |
| O | -0.38981400 | -3.23055900 | 0.13907800  |
| O | 0.57106400  | -0.08742700 | -2.90451800 |
| C | 4.25327000  | -0.58786700 | 0.19126800  |
| H | 5.13073600  | -1.14327700 | 0.49831800  |
| H | 4.41662500  | 0.48178500  | 0.16640200  |
| C | 3.39308100  | -1.18612600 | -0.89974800 |
| H | 2.97633300  | -0.51199000 | -1.63578500 |
| H | 3.70168800  | -2.13859200 | -1.31370300 |
| P | 2.64375700  | -1.21372800 | 0.76141400  |
| P | 1.27021700  | 0.38648000  | 1.13076700  |
| C | 2.48663900  | 2.65938400  | 0.48775300  |
| C | 2.35976100  | 2.26649600  | -0.78510900 |
| H | 1.72921500  | 3.25861700  | 0.97696700  |
| H | 3.38659100  | 2.47562400  | 1.05991200  |
| H | 3.14381900  | 1.72557600  | -1.30073600 |
| H | 1.47589300  | 2.49407200  | -1.36647300 |

#### TS3 (L4)

|                                              |  |  |                             |
|----------------------------------------------|--|--|-----------------------------|
| Zero-point correction=                       |  |  | 0.095792 (Hartree/Particle) |
| Thermal correction to Energy=                |  |  | 0.114982                    |
| Thermal correction to Enthalpy=              |  |  | 0.115926                    |
| Thermal correction to Gibbs Free Energy=     |  |  | 0.043172                    |
| Sum of electronic and zero-point Energies=   |  |  | -1395.313432                |
| Sum of electronic and thermal Energies=      |  |  | -1395.294243                |
| Sum of electronic and thermal Enthalpies=    |  |  | -1395.293299                |
| Sum of electronic and thermal Free Energies= |  |  | -1395.366052                |

0 1

|   |            |             |             |
|---|------------|-------------|-------------|
| W | 0.67517400 | -0.00061000 | -0.00153000 |
| C | 0.57943200 | -0.03541300 | 2.07511800  |
| C | 0.07947600 | 1.98942800  | 0.06248300  |
| C | 2.60944400 | 0.62350300  | 0.06196700  |

|   |             |             |             |
|---|-------------|-------------|-------------|
| C | 0.65439200  | 0.12028400  | -2.07788300 |
| C | 1.45308900  | -1.91894700 | -0.06005400 |
| O | 0.50884900  | -0.03608600 | 3.21818300  |
| O | -0.12404100 | 3.11935300  | 0.10049500  |
| O | 3.71261700  | 0.94885300  | 0.10078700  |
| O | 0.62681700  | 0.20597500  | -3.21950400 |
| O | 1.91700100  | -2.96623800 | -0.08872200 |
| C | -4.60668200 | -0.24952900 | 0.67425000  |
| H | -4.92693800 | 0.58584300  | 1.28239500  |
| H | -4.41951600 | -1.17954000 | 1.19140000  |
| C | -4.61707800 | -0.18216000 | -0.69059000 |
| H | -4.43854800 | -1.05644900 | -1.29963900 |
| H | -4.94677900 | 0.70862700  | -1.20862700 |
| P | -2.55412200 | 0.48782700  | 0.01014600  |
| P | -1.53077800 | -1.23923800 | -0.07774600 |

#### TS4 (L4)

|                                              |                             |
|----------------------------------------------|-----------------------------|
| Zero-point correction=                       | 0.096753 (Hartree/Particle) |
| Thermal correction to Energy=                | 0.114921                    |
| Thermal correction to Enthalpy=              | 0.115865                    |
| Thermal correction to Gibbs Free Energy=     | 0.046266                    |
| Sum of electronic and zero-point Energies=   | -1395.309656                |
| Sum of electronic and thermal Energies=      | -1395.291488                |
| Sum of electronic and thermal Enthalpies=    | -1395.290543                |
| Sum of electronic and thermal Free Energies= | -1395.360143                |

0 1

|   |             |             |             |
|---|-------------|-------------|-------------|
| W | 0.67798800  | -0.01645700 | -0.01397100 |
| C | -0.17298300 | 0.00846800  | -1.89187200 |
| C | 0.39519700  | -2.06902800 | 0.03422400  |
| C | 2.52844300  | -0.19814300 | -0.81314000 |
| C | 1.44275200  | -0.05891900 | 1.91143400  |
| C | 0.92009400  | 2.03843200  | -0.03937700 |
| O | -0.68175500 | 0.01446400  | -2.92240600 |
| O | 0.21260700  | -3.20155300 | 0.06252400  |
| O | 3.57787200  | -0.29477500 | -1.27955500 |
| O | 1.87202300  | -0.08063500 | 2.97541500  |
| O | 1.06094900  | 3.17762300  | -0.05255000 |
| C | -3.13048000 | 1.12064200  | -0.29953300 |
| H | -2.95686500 | 1.06730100  | -1.37096700 |
| H | -3.07676200 | 2.15770600  | 0.01802500  |
| C | -4.30159500 | 0.30724200  | 0.21939800  |
| H | -4.62993100 | 0.62702500  | 1.20144500  |
| H | -5.12369200 | 0.14529200  | -0.47164800 |
| P | -2.95091700 | -0.90440300 | 0.12295100  |
| P | -1.63615000 | 0.46489000  | 0.98790000  |

#### 11 (L5)

|                                              |                             |
|----------------------------------------------|-----------------------------|
| Zero-point correction=                       | 0.154817 (Hartree/Particle) |
| Thermal correction to Energy=                | 0.175541                    |
| Thermal correction to Enthalpy=              | 0.176485                    |
| Thermal correction to Gibbs Free Energy=     | 0.102142                    |
| Sum of electronic and zero-point Energies=   | -1474.378581                |
| Sum of electronic and thermal Energies=      | -1474.357857                |
| Sum of electronic and thermal Enthalpies=    | -1474.356913                |
| Sum of electronic and thermal Free Energies= | -1474.431255                |

|     |             |             |             |
|-----|-------------|-------------|-------------|
| 0 1 |             |             |             |
| P   | 1.51908400  | 0.91406700  | -0.01896400 |
| W   | -0.83477800 | -0.09711200 | -0.00301400 |
| C   | -0.26868400 | -1.82563900 | 0.95167500  |
| C   | -0.46452400 | -0.96700200 | -1.82836500 |
| C   | -2.73399200 | -0.76842000 | -0.01493300 |
| C   | -1.44175200 | 1.62469800  | -0.94862800 |
| C   | -1.10534200 | 0.80580100  | 1.82560700  |
| O   | 0.01032200  | -2.80853300 | 1.49390700  |
| O   | -0.24112300 | -1.45914500 | -2.85002300 |
| O   | -3.83041800 | -1.14498400 | -0.02363000 |
| O   | -1.76721500 | 2.59928100  | -1.47748700 |
| O   | -1.22848200 | 1.32973200  | 2.84773800  |
| P   | 3.49437200  | -0.09338400 | -0.23198100 |
| C   | 1.84139300  | 2.62377700  | -0.66211600 |
| H   | 2.77067200  | 2.79139100  | -1.20219100 |
| H   | 0.98081200  | 3.12791200  | -1.09498700 |
| C   | 1.91370600  | 2.50870600  | 0.84183700  |
| H   | 2.88899100  | 2.60279500  | 1.31408700  |
| H   | 1.09657300  | 2.92715600  | 1.42509700  |
| C   | 3.20973200  | -1.59428400 | 0.86940300  |
| H   | 2.37244600  | -1.56691400 | 1.56055100  |
| H   | 4.11973500  | -2.00794300 | 1.29857900  |
| C   | 2.92690300  | -1.85428700 | -0.57179400 |
| H   | 1.89351300  | -2.00195400 | -0.87356700 |
| H   | 3.63970900  | -2.44728000 | -1.14051100 |

### 3 (L5)

|                                              |                             |
|----------------------------------------------|-----------------------------|
| Zero-point correction=                       | 0.099712 (Hartree/Particle) |
| Thermal correction to Energy=                | 0.117827                    |
| Thermal correction to Enthalpy=              | 0.118771                    |
| Thermal correction to Gibbs Free Energy=     | 0.047462                    |
| Sum of electronic and zero-point Energies=   | -1395.817535                |
| Sum of electronic and thermal Energies=      | -1395.799419                |
| Sum of electronic and thermal Enthalpies=    | -1395.798475                |
| Sum of electronic and thermal Free Energies= | -1395.869785                |

|     |             |             |             |
|-----|-------------|-------------|-------------|
| 0 1 |             |             |             |
| W   | -0.69661200 | -0.00508900 | -0.00007600 |
| C   | -0.68329200 | 1.45116000  | -1.45854400 |
| C   | -0.68352500 | 1.46804600  | 1.44137600  |
| C   | -2.73184400 | 0.00113700  | -0.00054300 |
| C   | -0.68274400 | -1.46564000 | 1.46007300  |
| C   | -0.68092200 | -1.48256300 | -1.44253100 |
| O   | -0.66990600 | 2.26925800  | -2.27217300 |
| O   | -0.66975700 | 2.29576800  | 2.24523200  |
| O   | -3.88777200 | 0.00744500  | -0.00047700 |
| O   | -0.66988200 | -2.28156100 | 2.27388700  |
| O   | -0.66748000 | -2.30812300 | -2.24718300 |
| C   | 2.97239700  | 1.45052700  | 0.00144800  |
| H   | 2.87110100  | 2.08688000  | 0.88798800  |
| H   | 2.87117600  | 2.08833700  | -0.88351700 |
| C   | 4.24353600  | 0.55999700  | 0.00050000  |
| H   | 4.87110000  | 0.71036800  | -0.88426000 |

|   |            |             |             |
|---|------------|-------------|-------------|
| H | 4.87160700 | 0.70887800  | 0.88524600  |
| P | 1.76763300 | 0.03530900  | 0.00037400  |
| P | 3.43643600 | -1.16705500 | -0.00069300 |

#### 2a (L5)

|                                              |  |  |                             |
|----------------------------------------------|--|--|-----------------------------|
| Zero-point correction=                       |  |  | 0.098087 (Hartree/Particle) |
| Thermal correction to Energy=                |  |  | 0.116906                    |
| Thermal correction to Enthalpy=              |  |  | 0.117850                    |
| Thermal correction to Gibbs Free Energy=     |  |  | 0.047079                    |
| Sum of electronic and zero-point Energies=   |  |  | -1395.780358                |
| Sum of electronic and thermal Energies=      |  |  | -1395.761540                |
| Sum of electronic and thermal Enthalpies=    |  |  | -1395.760596                |
| Sum of electronic and thermal Free Energies= |  |  | -1395.831367                |

0 1

|   |             |             |             |
|---|-------------|-------------|-------------|
| W | 0.73510400  | -0.00458600 | 0.00001100  |
| C | 0.14379200  | -1.37450800 | -1.43058300 |
| C | 0.14372500  | -1.37392700 | 1.43114400  |
| C | 2.65271300  | -0.78283900 | 0.00036600  |
| C | 1.29505600  | 1.37466900  | 1.43629300  |
| C | 1.29533800  | 1.37392100  | -1.43690000 |
| O | -0.20827500 | -2.13825900 | -2.21782200 |
| O | -0.20835600 | -2.13730100 | 2.21874200  |
| O | 3.71501400  | -1.23207300 | 0.00034900  |
| O | 1.61174100  | 2.14949900  | 2.22825700  |
| O | 1.61223000  | 2.14835800  | -2.22916400 |
| C | -4.48165000 | 0.47202100  | -0.72710200 |
| H | -5.16781500 | -0.18380300 | -1.25785000 |
| H | -4.21020400 | 1.38004900  | -1.25711100 |
| C | -4.48159500 | 0.47202500  | 0.72699200  |
| H | -4.21012500 | 1.38005100  | 1.25699300  |
| H | -5.16770800 | -0.18381700 | 1.25778500  |
| P | -2.99188800 | -0.56857100 | -0.00011100 |
| P | -1.48977600 | 1.01236900  | -0.00020700 |

#### 4 (L5)

|                                              |  |  |                             |
|----------------------------------------------|--|--|-----------------------------|
| Zero-point correction=                       |  |  | 0.044296 (Hartree/Particle) |
| Thermal correction to Energy=                |  |  | 0.059945                    |
| Thermal correction to Enthalpy=              |  |  | 0.060889                    |
| Thermal correction to Gibbs Free Energy=     |  |  | -0.002494                   |
| Sum of electronic and zero-point Energies=   |  |  | -1317.253980                |
| Sum of electronic and thermal Energies=      |  |  | -1317.238331                |
| Sum of electronic and thermal Enthalpies=    |  |  | -1317.237387                |
| Sum of electronic and thermal Free Energies= |  |  | -1317.300770                |

0 1

|   |             |             |             |
|---|-------------|-------------|-------------|
| P | 3.98336300  | 0.00009700  | -0.00012800 |
| P | 2.08094400  | 0.00030300  | -0.00010500 |
| W | -0.35959700 | -0.00000600 | 0.00000800  |
| C | -0.37510200 | 0.36544300  | -2.03673300 |
| C | -0.37514100 | 2.03676200  | 0.36535400  |
| C | -2.39312900 | -0.00039600 | 0.00031300  |
| C | -0.37447500 | -0.36539500 | 2.03677800  |
| C | -0.37451300 | -2.03675100 | -0.36548300 |
| O | -0.39510400 | 0.56802800  | -3.16934500 |



|   |             |             |             |
|---|-------------|-------------|-------------|
| O | -0.39493500 | 3.16939900  | 0.56781500  |
| O | -3.54689400 | -0.00059800 | 0.00044300  |
| O | -0.39410900 | -0.56791300 | 3.16940600  |
| O | -0.39399300 | -3.16936100 | -0.56812600 |

### C<sub>2</sub>H<sub>4</sub> (L5)

|                                              |                             |
|----------------------------------------------|-----------------------------|
| Zero-point correction=                       | 0.051197 (Hartree/Particle) |
| Thermal correction to Energy=                | 0.054237                    |
| Thermal correction to Enthalpy=              | 0.055181                    |
| Thermal correction to Gibbs Free Energy=     | 0.029666                    |
| Sum of electronic and zero-point Energies=   | -78.536015                  |
| Sum of electronic and thermal Energies=      | -78.532975                  |
| Sum of electronic and thermal Enthalpies=    | -78.532031                  |
| Sum of electronic and thermal Free Energies= | -78.557546                  |

0 1

|   |             |             |            |
|---|-------------|-------------|------------|
| C | 0.00000000  | 0.66611200  | 0.00000000 |
| H | 0.92401600  | 1.24017200  | 0.00000000 |
| H | -0.92401000 | 1.24017800  | 0.00000000 |
| C | 0.00000000  | -0.66611200 | 0.00000000 |
| H | -0.92401600 | -1.24017200 | 0.00000000 |
| H | 0.92401000  | -1.24017800 | 0.00000000 |

### TS1 (L5)

|                                              |                             |
|----------------------------------------------|-----------------------------|
| Zero-point correction=                       | 0.151231 (Hartree/Particle) |
| Thermal correction to Energy=                | 0.173151                    |
| Thermal correction to Enthalpy=              | 0.174095                    |
| Thermal correction to Gibbs Free Energy=     | 0.095940                    |
| Sum of electronic and zero-point Energies=   | -1474.297563                |
| Sum of electronic and thermal Energies=      | -1474.275643                |
| Sum of electronic and thermal Enthalpies=    | -1474.274699                |
| Sum of electronic and thermal Free Energies= | -1474.352853                |

0 1

|   |             |             |             |
|---|-------------|-------------|-------------|
| P | 1.40770400  | 0.78219700  | 0.37296800  |
| W | -0.88004100 | -0.11533200 | -0.01085100 |
| C | -1.25385000 | 1.49664100  | -1.24199800 |
| C | -1.51259800 | 0.97565200  | 1.61073000  |
| C | -2.75865300 | -0.82495200 | -0.32930000 |
| C | -0.45554500 | -1.72701100 | 1.20149400  |
| C | -0.13240200 | -1.17211900 | -1.61333100 |
| O | -1.43712100 | 2.40669800  | -1.92837900 |
| O | -1.83927400 | 1.60702000  | 2.52161900  |
| O | -3.83056600 | -1.22077400 | -0.50957600 |
| O | -0.19608100 | -2.63466600 | 1.86708800  |
| O | 0.31518100  | -1.76623900 | -2.49491300 |
| P | 3.19001000  | 0.44789100  | -0.62526800 |
| C | 2.19355000  | 2.60818300  | -0.37739300 |
| H | 3.18021100  | 3.03671400  | -0.52449300 |
| H | 1.47384600  | 2.90943100  | -1.13558600 |
| C | 1.66889900  | 2.47836100  | 1.03533000  |
| H | 2.42418600  | 2.58348600  | 1.81286700  |
| H | 0.74032000  | 3.00641900  | 1.26396200  |
| C | 3.98591000  | -1.73932000 | 0.87181500  |
| H | 3.55136600  | -1.49773100 | 1.83753000  |

|   |            |             |             |
|---|------------|-------------|-------------|
| H | 5.06343400 | -1.63218500 | 0.78411100  |
| C | 3.23082100 | -2.19593500 | -0.15056800 |
| H | 2.16272700 | -2.36262100 | -0.03913200 |
| H | 3.66733000 | -2.49357900 | -1.09915500 |

### TS2 (L5)

|                                              |  |  |                             |
|----------------------------------------------|--|--|-----------------------------|
| Zero-point correction=                       |  |  | 0.151794 (Hartree/Particle) |
| Thermal correction to Energy=                |  |  | 0.173554                    |
| Thermal correction to Enthalpy=              |  |  | 0.174498                    |
| Thermal correction to Gibbs Free Energy=     |  |  | 0.097788                    |
| Sum of electronic and zero-point Energies=   |  |  | -1474.322049                |
| Sum of electronic and thermal Energies=      |  |  | -1474.300289                |
| Sum of electronic and thermal Enthalpies=    |  |  | -1474.299345                |
| Sum of electronic and thermal Free Energies= |  |  | -1474.376055                |

0 1

|   |             |             |             |
|---|-------------|-------------|-------------|
| W | -0.89514400 | -0.03266500 | 0.03059200  |
| C | 0.02376900  | -0.92011400 | 1.64396200  |
| C | -1.18604300 | -1.91978900 | -0.78121600 |
| C | -2.75132500 | -0.16412900 | 0.89831300  |
| C | -1.72341800 | 0.88748600  | -1.61625800 |
| C | -0.61372600 | 1.82030600  | 0.89011800  |
| O | 0.54470100  | -1.40698700 | 2.55157700  |
| O | -1.34101700 | -2.97350500 | -1.21887800 |
| O | -3.79547500 | -0.24213900 | 1.38701600  |
| O | -2.17635900 | 1.41576600  | -2.53646900 |
| O | -0.43989600 | 2.85848500  | 1.36404600  |
| C | 3.40286300  | -1.01854300 | 1.00174600  |
| H | 3.70138200  | -1.84029600 | 1.65005300  |
| H | 2.99695000  | -0.16496100 | 1.53822300  |
| C | 4.24015700  | -0.74557800 | -0.23503900 |
| H | 4.40988600  | 0.29162300  | -0.51030100 |
| H | 5.09982800  | -1.38995200 | -0.40953200 |
| P | 2.57308500  | -1.48273900 | -0.59758200 |
| P | 1.23031300  | 0.13203400  | -1.22775100 |
| C | 2.82806500  | 2.40489300  | 0.60565500  |
| C | 2.45564400  | 2.69986000  | -0.64982200 |
| H | 2.14038000  | 2.50054600  | 1.44010700  |
| H | 3.83639900  | 2.07395600  | 0.83868900  |
| H | 3.14829500  | 2.63901400  | -1.48419100 |
| H | 1.46504200  | 3.08852500  | -0.86993300 |

### TS3 (L5)

|                                              |  |  |                             |
|----------------------------------------------|--|--|-----------------------------|
| Zero-point correction=                       |  |  | 0.097131 (Hartree/Particle) |
| Thermal correction to Energy=                |  |  | 0.115987                    |
| Thermal correction to Enthalpy=              |  |  | 0.116932                    |
| Thermal correction to Gibbs Free Energy=     |  |  | 0.043437                    |
| Sum of electronic and zero-point Energies=   |  |  | -1395.771540                |
| Sum of electronic and thermal Energies=      |  |  | -1395.752684                |
| Sum of electronic and thermal Enthalpies=    |  |  | -1395.751739                |
| Sum of electronic and thermal Free Energies= |  |  | -1395.825234                |

0 1

|   |            |             |             |
|---|------------|-------------|-------------|
| W | 0.72843400 | -0.00355200 | -0.00105700 |
|---|------------|-------------|-------------|

|   |             |             |             |
|---|-------------|-------------|-------------|
| C | 0.18605900  | 1.98442500  | 0.12008200  |
| C | 0.63083000  | 0.14880800  | -2.05852000 |
| C | 2.68266700  | 0.52996500  | -0.02881200 |
| C | 1.35411700  | -1.96210700 | -0.11614600 |
| C | 0.74540100  | -0.06962500 | 2.06402400  |
| O | -0.03167900 | 3.11753100  | 0.19013500  |
| O | 0.56247000  | 0.25130800  | -3.20537900 |
| O | 3.80393400  | 0.82036800  | -0.04624800 |
| O | 1.71721600  | -3.05569300 | -0.17950500 |
| O | 0.74521600  | -0.08951300 | 3.21737000  |
| C | -4.80322300 | -0.28092300 | 0.68878800  |
| H | -5.19477300 | 0.56173800  | 1.25178200  |
| H | -4.56093800 | -1.17614200 | 1.25248900  |
| C | -4.79666800 | -0.28054600 | -0.68632900 |
| H | -4.54858900 | -1.17547500 | -1.24781000 |
| H | -5.18233700 | 0.56243200  | -1.25288800 |
| P | -2.73287800 | 0.59656000  | 0.01289600  |
| P | -1.58644700 | -1.08200600 | 0.01144500  |

#### TS4 (L5)

|                                              |                             |
|----------------------------------------------|-----------------------------|
| Zero-point correction=                       | 0.097773 (Hartree/Particle) |
| Thermal correction to Energy=                | 0.115668                    |
| Thermal correction to Enthalpy=              | 0.116612                    |
| Thermal correction to Gibbs Free Energy=     | 0.048353                    |
| Sum of electronic and zero-point Energies=   | -1395.758992                |
| Sum of electronic and thermal Energies=      | -1395.741098                |
| Sum of electronic and thermal Enthalpies=    | -1395.740153                |
| Sum of electronic and thermal Free Energies= | -1395.808412                |

0 1

|   |             |             |             |
|---|-------------|-------------|-------------|
| W | 0.69313600  | -0.00760100 | -0.02100500 |
| C | -0.19534200 | 0.36207500  | -1.83196600 |
| C | 0.34664200  | -2.01990000 | -0.28584600 |
| C | 2.52598000  | -0.13716200 | -0.87477900 |
| C | 1.46639600  | -0.38525100 | 1.85401800  |
| C | 1.00477100  | 2.00448300  | 0.28645600  |
| O | -0.75960500 | 0.56875200  | -2.82065400 |
| O | 0.12572900  | -3.14565000 | -0.42212700 |
| O | 3.56828200  | -0.21478700 | -1.37522700 |
| O | 1.89733500  | -0.59381300 | 2.90492800  |
| O | 1.18293100  | 3.13231600  | 0.46298900  |
| C | -3.24065400 | 1.17423700  | -0.23022900 |
| H | -3.07574500 | 1.22121700  | -1.30495900 |
| H | -3.10871200 | 2.14472800  | 0.24172400  |
| C | -4.35368400 | 0.28115900  | 0.26503200  |
| H | -4.69237800 | 0.51767900  | 1.27313800  |
| H | -5.17932000 | 0.11209300  | -0.42940800 |
| P | -2.97574700 | -0.95021000 | 0.07395400  |
| P | -1.60278100 | 0.34450300  | 1.03794600  |

2b

0 1

|    |            |             |             |
|----|------------|-------------|-------------|
| Mo | 0.88077800 | -0.00529900 | -0.00010000 |
| C  | 0.31341600 | -1.38641700 | -1.44339200 |
| C  | 0.31394000 | -1.38662300 | 1.44320000  |
| C  | 2.82649500 | -0.75591100 | -0.00043900 |

|   |             |             |             |
|---|-------------|-------------|-------------|
| C | 1.41434000  | 1.38970100  | 1.44690000  |
| C | 1.41383700  | 1.38986500  | -1.44714100 |
| O | -0.01264300 | -2.15350600 | -2.23648300 |
| O | -0.01187800 | -2.15385500 | 2.23625100  |
| O | 3.89428300  | -1.18593700 | -0.00070700 |
| O | 1.71743400  | 2.16815000  | 2.23829800  |
| O | 1.71661700  | 2.16835700  | -2.23861600 |
| C | -4.33638900 | 0.46525200  | -0.72527000 |
| H | -5.02230500 | -0.18975900 | -1.25683900 |
| H | -4.05555800 | 1.36951800  | -1.25572600 |
| C | -4.33644600 | 0.46555200  | 0.72583900  |
| H | -4.05565700 | 1.37004400  | 1.25593100  |
| H | -5.02239100 | -0.18923700 | 1.25764200  |
| P | -2.84720100 | -0.58492800 | 0.00056400  |
| P | -1.34762600 | 0.98678300  | 0.00044200  |

## NMR spectra

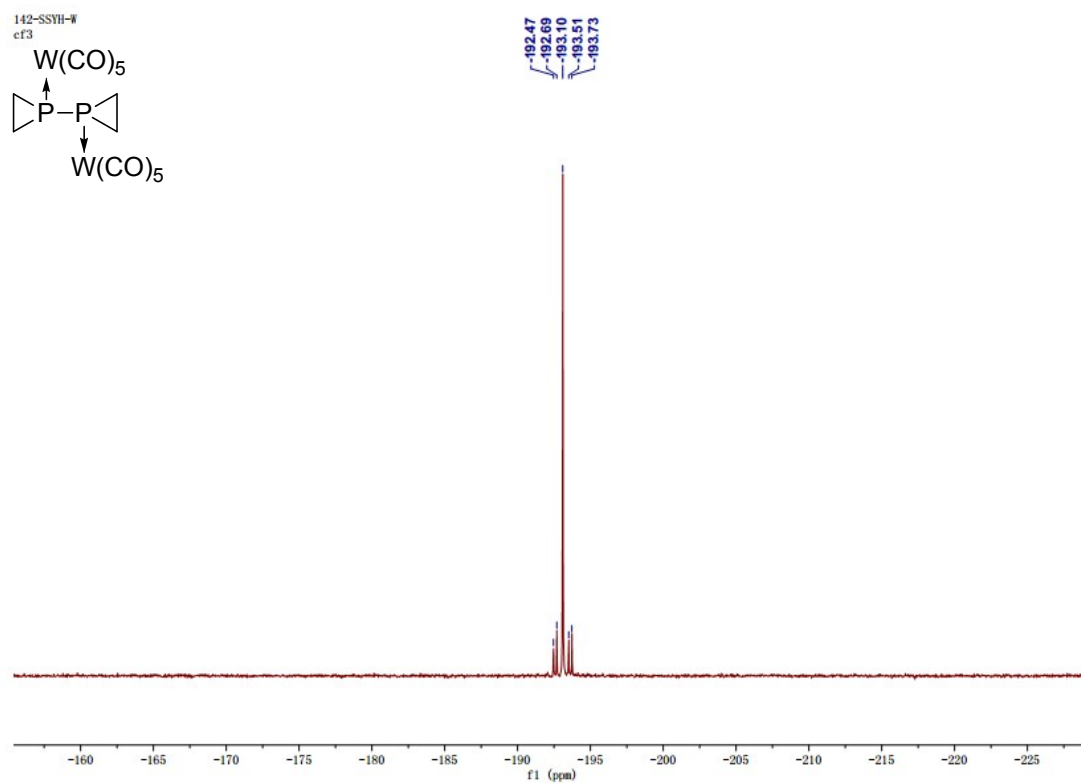

$^{31}\text{P}$   $\{^1\text{H}\}$  NMR of Compound 1a

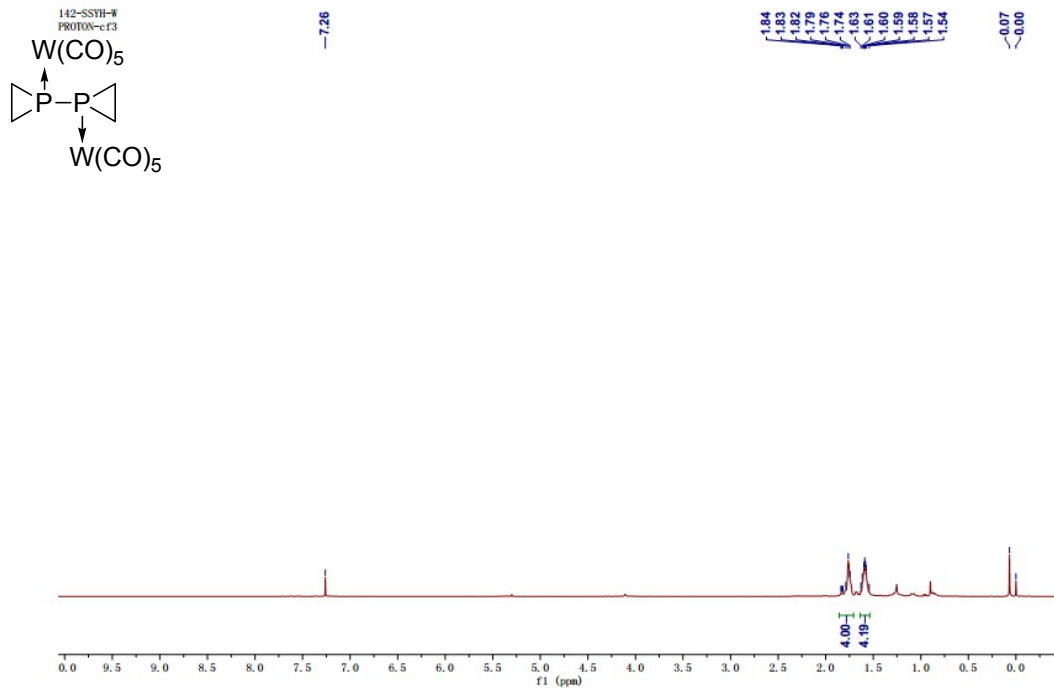

<sup>1</sup>H NMR of Compound **1a**

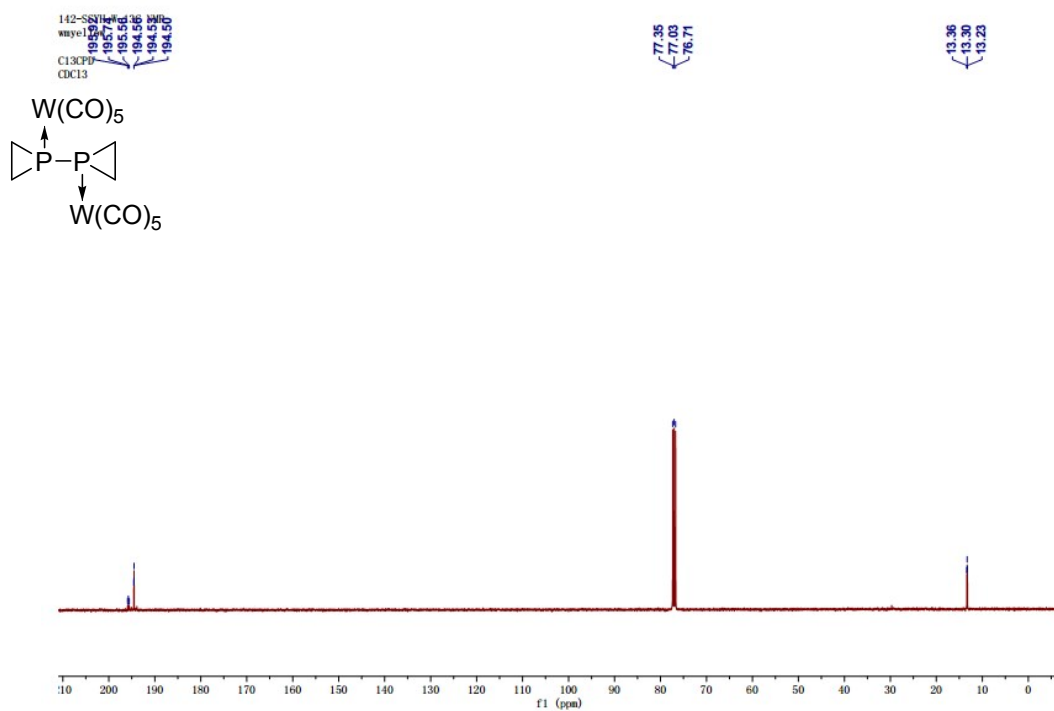

<sup>13</sup>C {<sup>1</sup>H} NMR of Compound **1a**

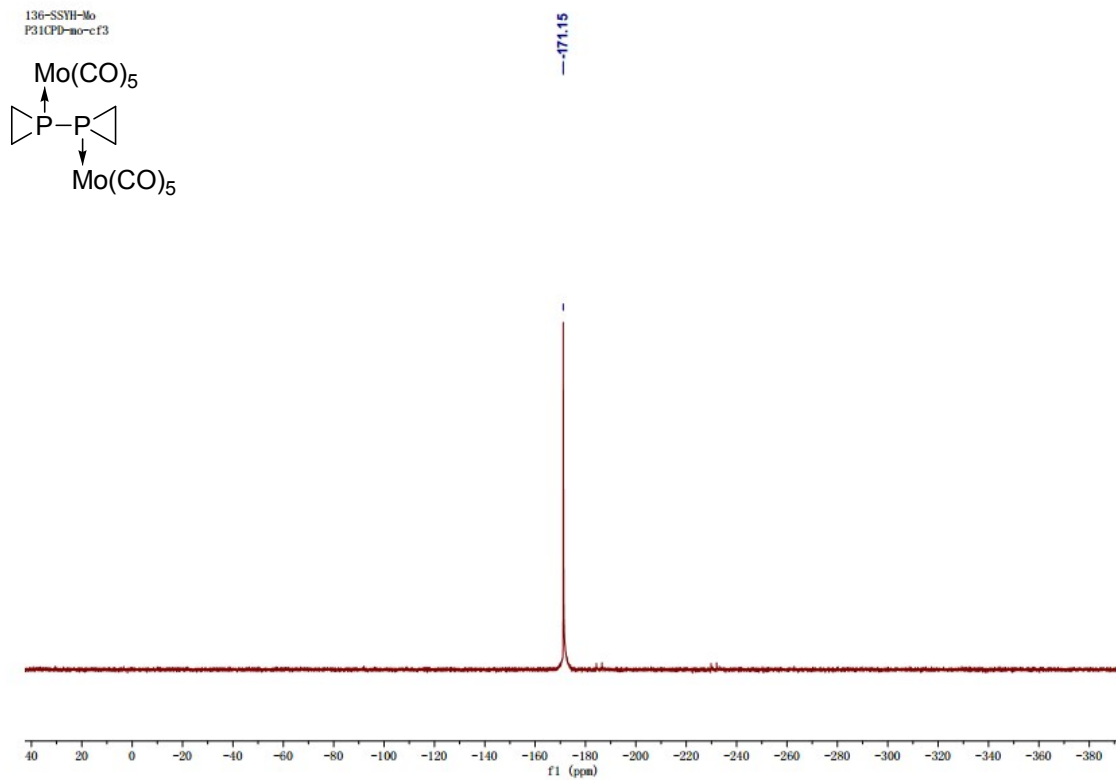

<sup>31</sup>P {<sup>1</sup>H} NMR of Compound **1b**

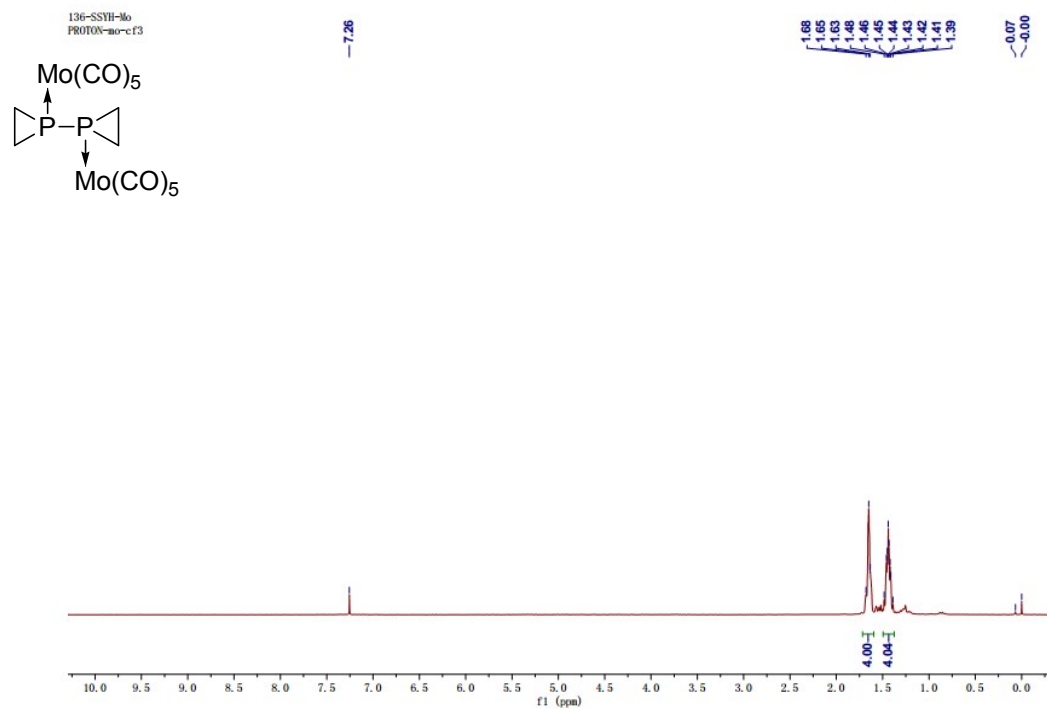

<sup>1</sup>H NMR of Compound **1b**

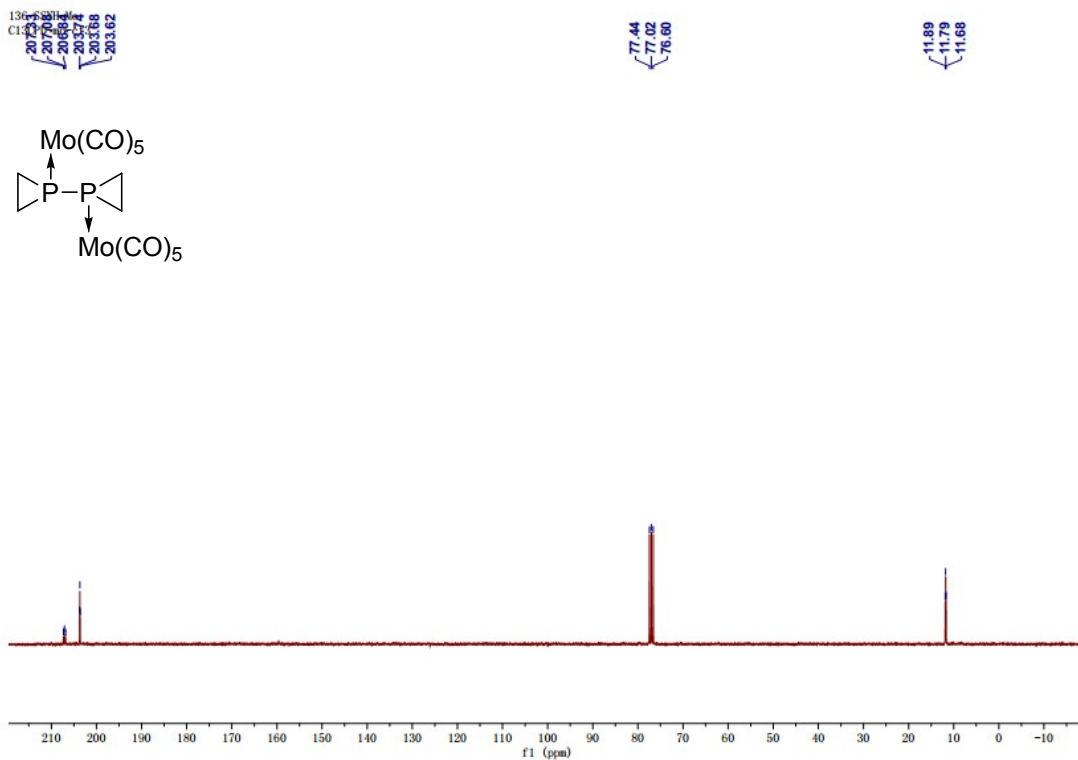

$^{13}\text{C}$   $\{^1\text{H}\}$  NMR of Compound **1b**

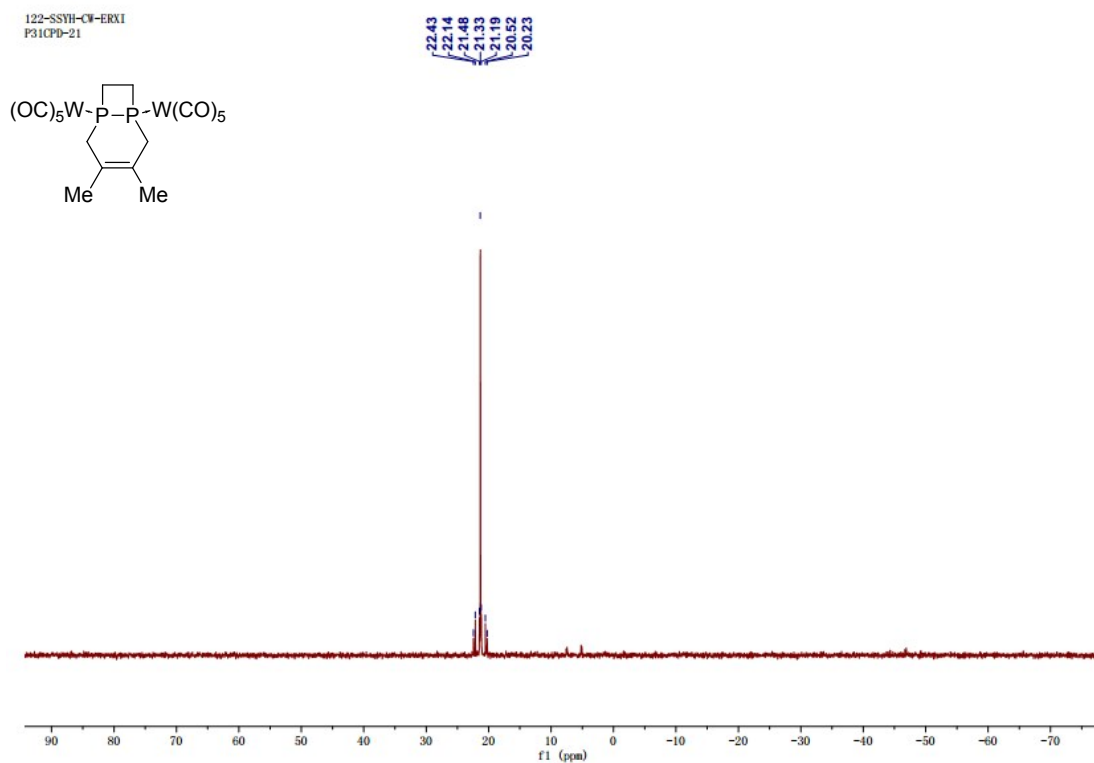

$^{31}\text{P}$   $\{^1\text{H}\}$  NMR of Compound **6**

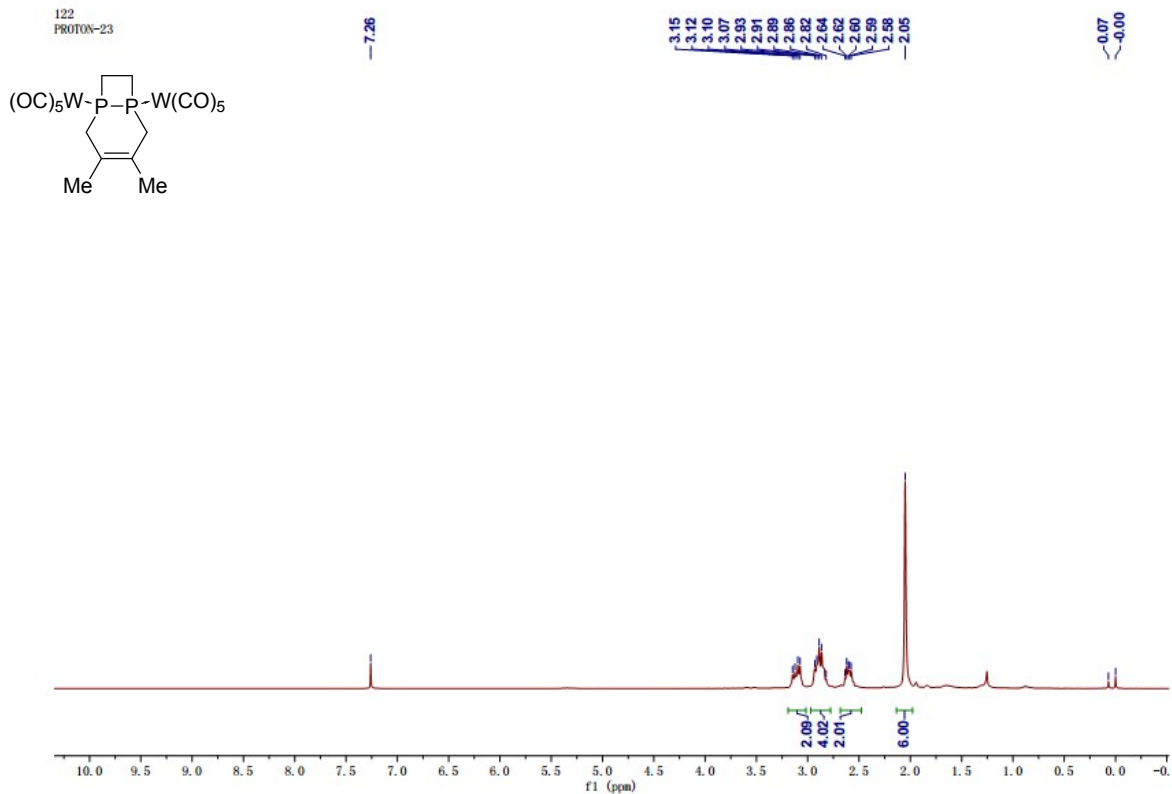

<sup>1</sup>H NMR of Compound 6

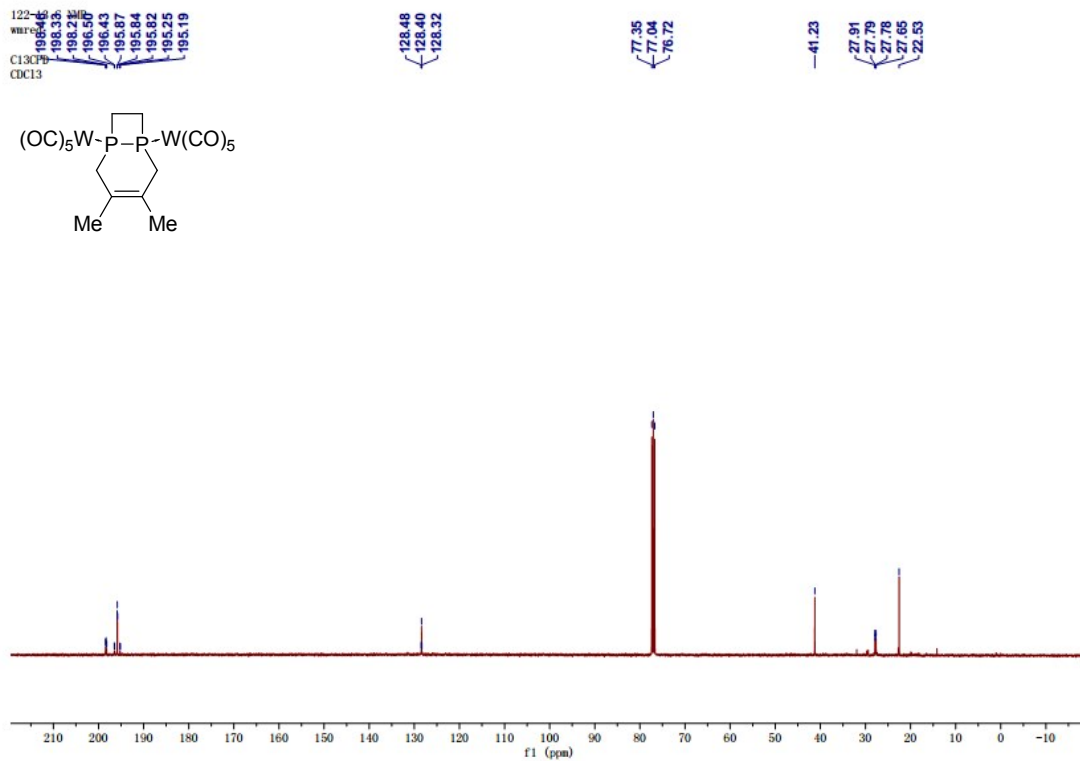

<sup>13</sup>C {<sup>1</sup>H} NMR of Compound 6



122-SSYH-CW-ERXI  
F31CPD-23

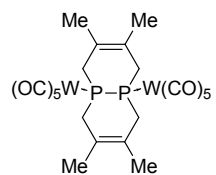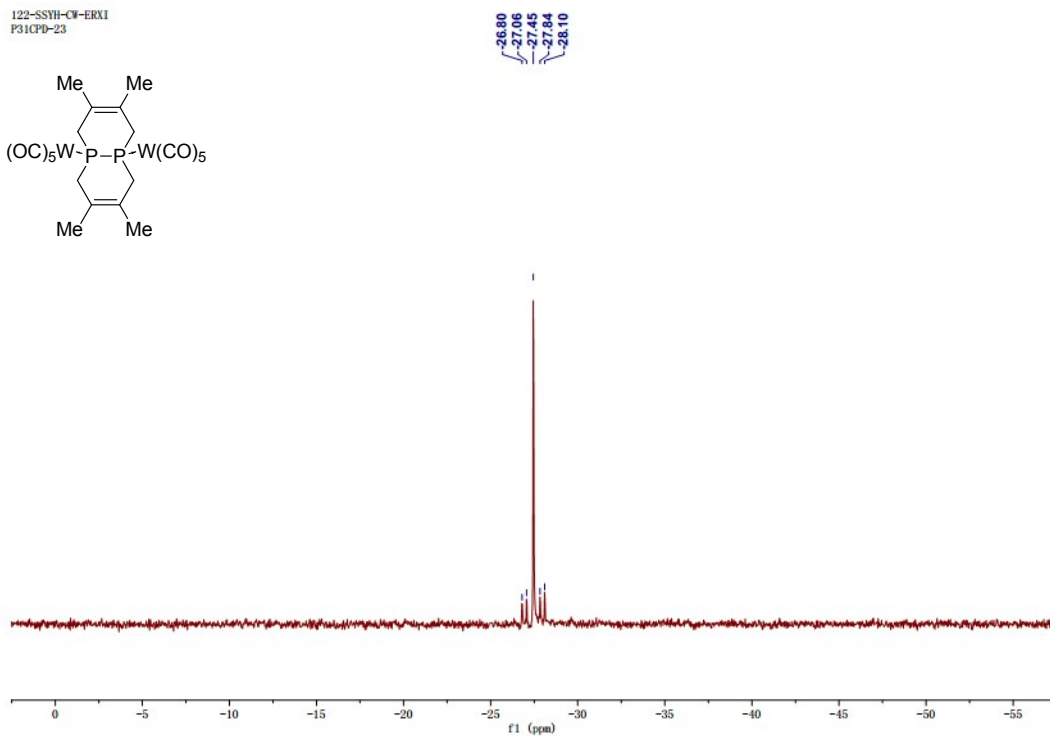

31

<sup>31</sup>P {<sup>1</sup>H} NMR of Compound 7

122-SSYH-CW-ERXI  
PROTON-26-2

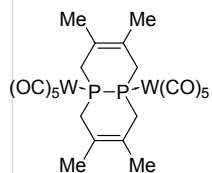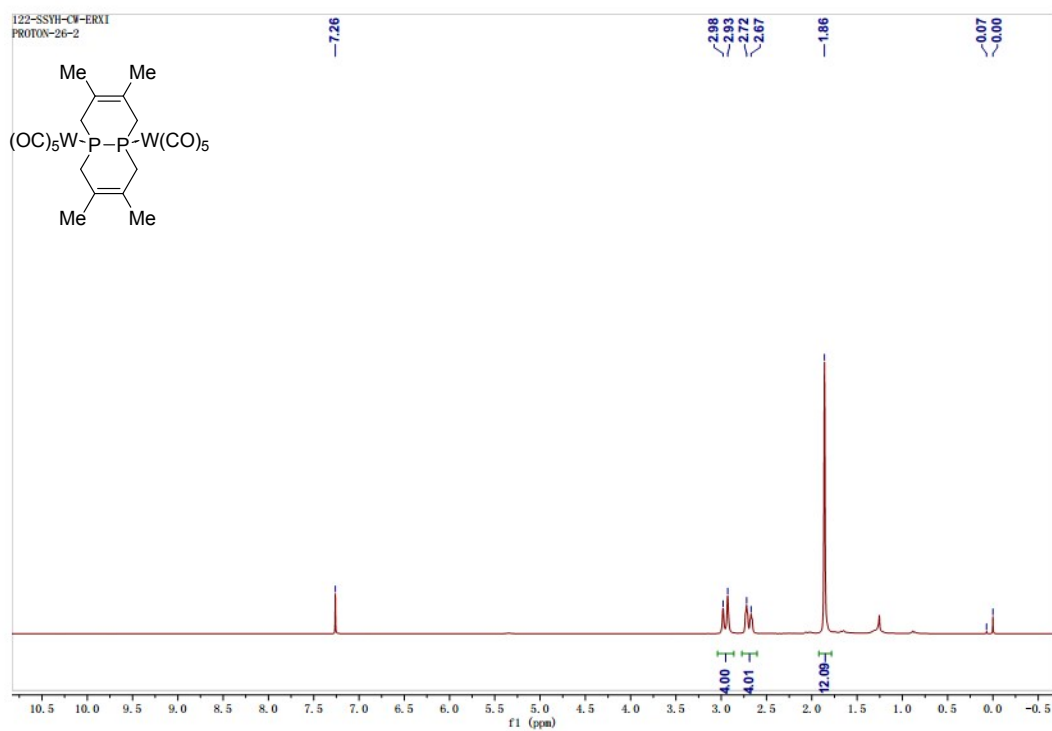

<sup>1</sup>H NMR of Compound 7

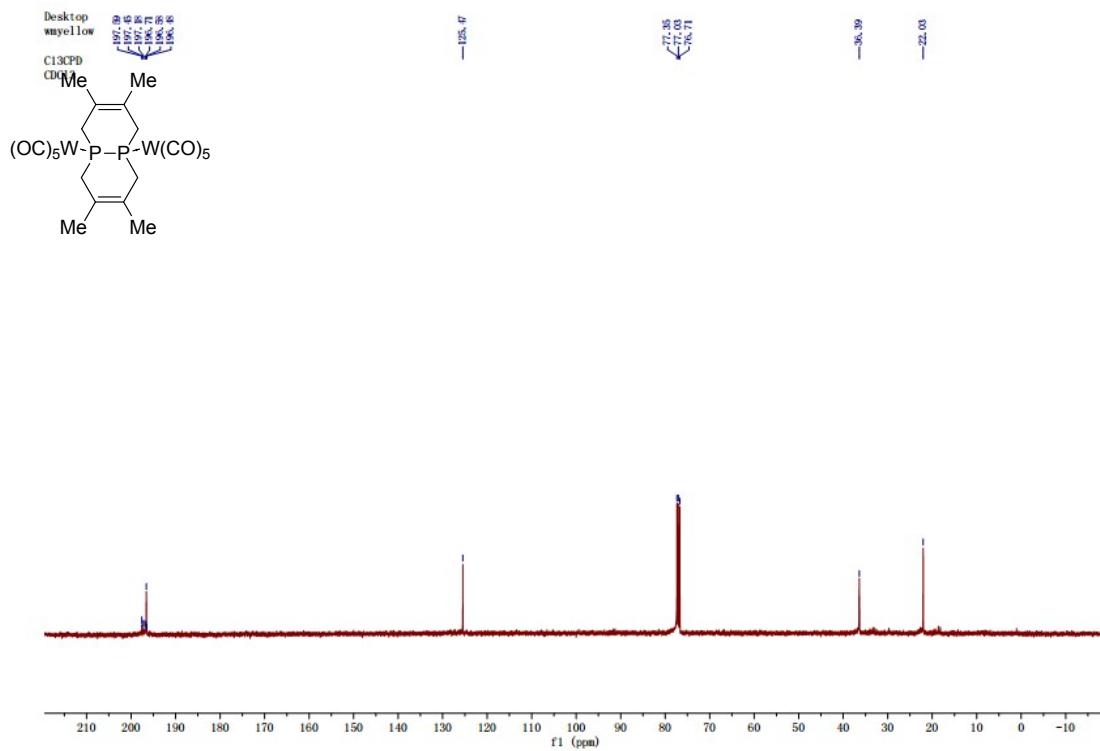

$^{13}\text{C} \{^1\text{H}\}$  NMR of Compound **7**

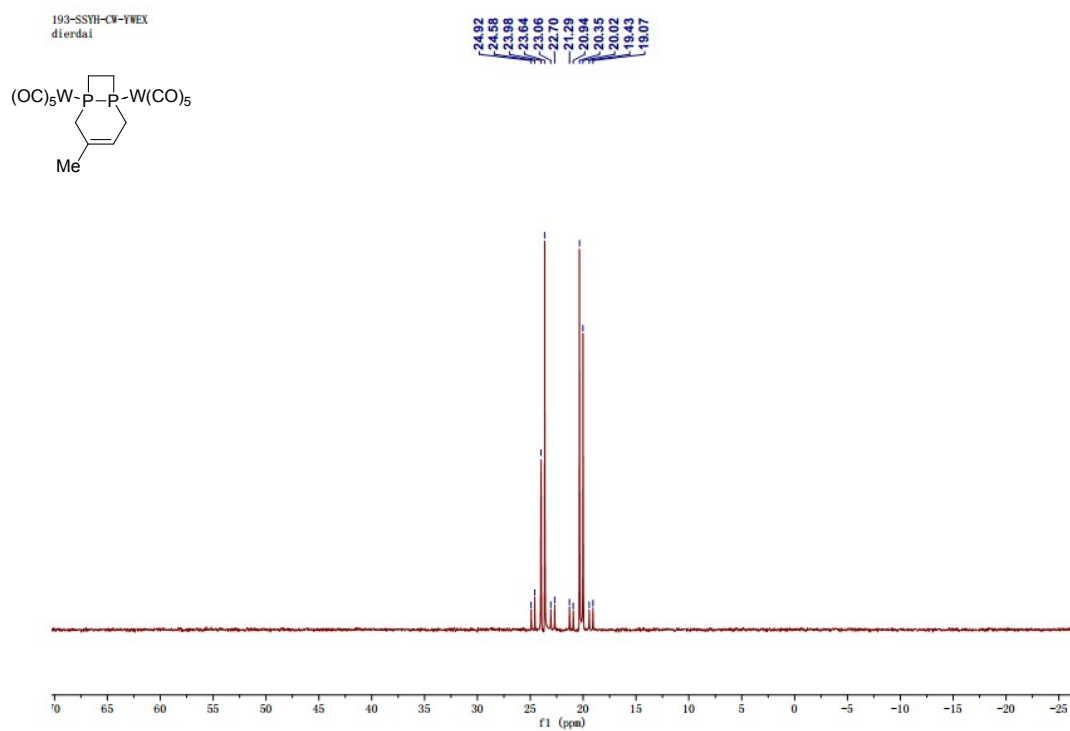

$^{31}\text{P} \{^1\text{H}\}$  NMR of Compound **8**

193-SSVII-CW-YWEX  
 PROTON-diyaiai-23, 19

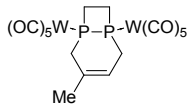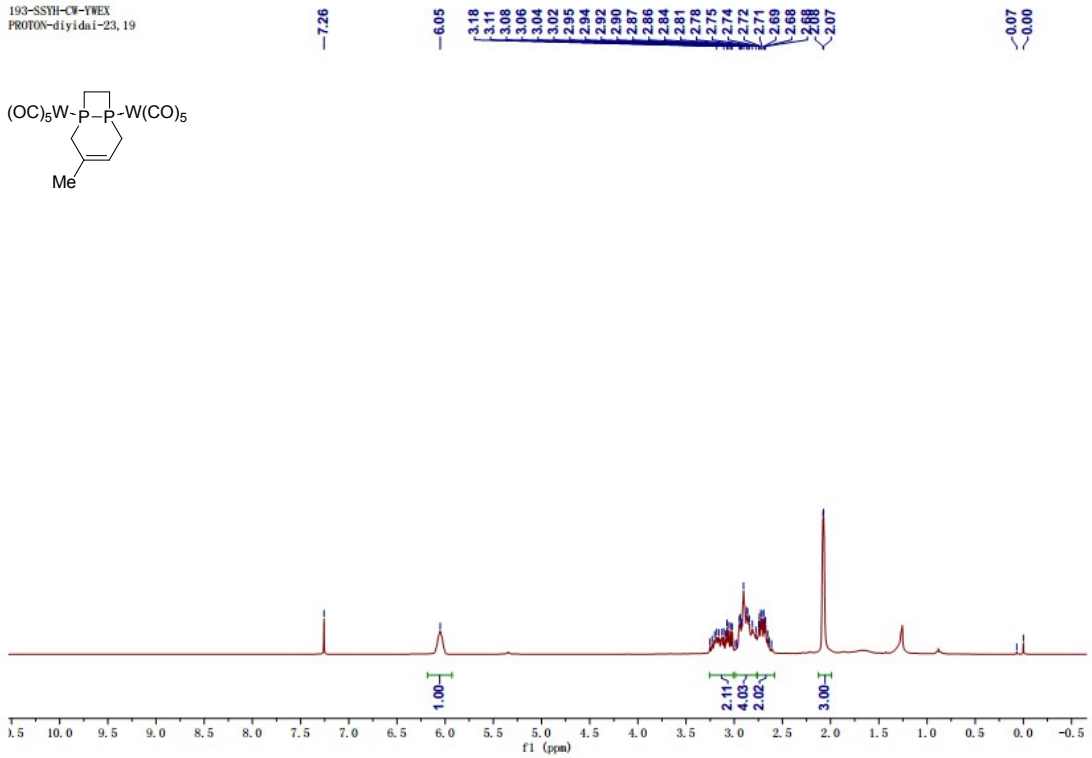

<sup>1</sup>H NMR of Compound 8

198.40  
 198.35  
 198.34  
 198.11  
 197.99  
 195.85  
 195.83  
 195.78  
 195.76  
 195.74

137.63  
 137.51  
 137.40

121.11  
 121.01  
 120.89

77.45  
 77.03  
 76.60

39.34  
 39.31  
 34.29  
 34.25  
 34.20  
 34.20  
 28.57  
 28.50  
 28.17  
 28.11  
 27.54  
 27.48  
 27.14  
 27.09  
 26.45  
 26.42  
 26.39

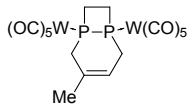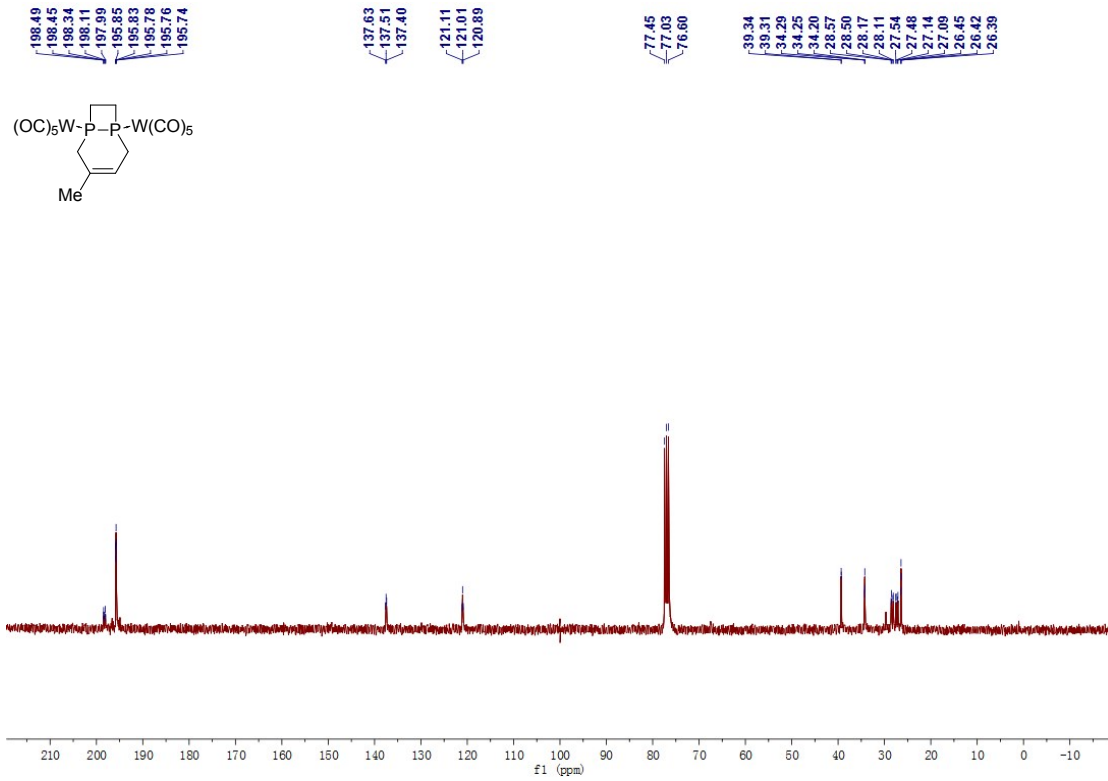

<sup>13</sup>C {<sup>1</sup>H} NMR of Compound 8

129  
P31CFD-yiwuerxi

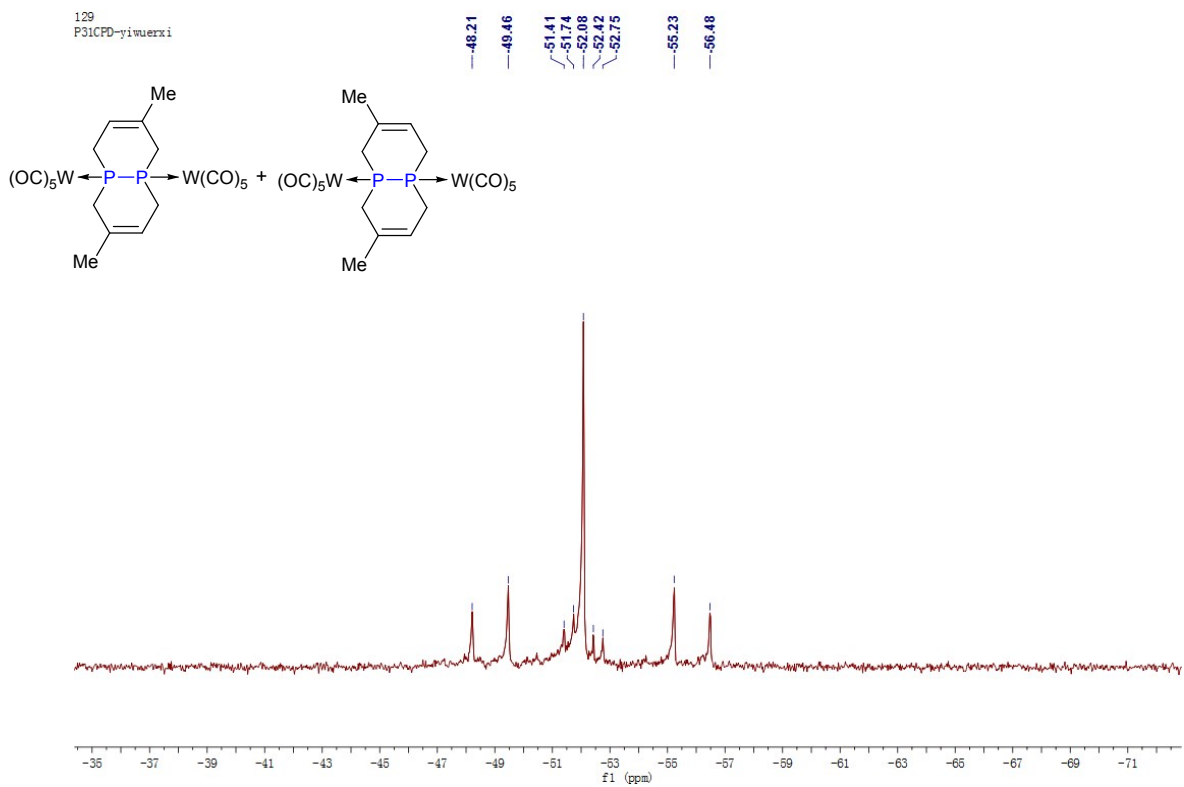

$^{31}P$  { $^1H$ } NMR of Compound 9 and 9'

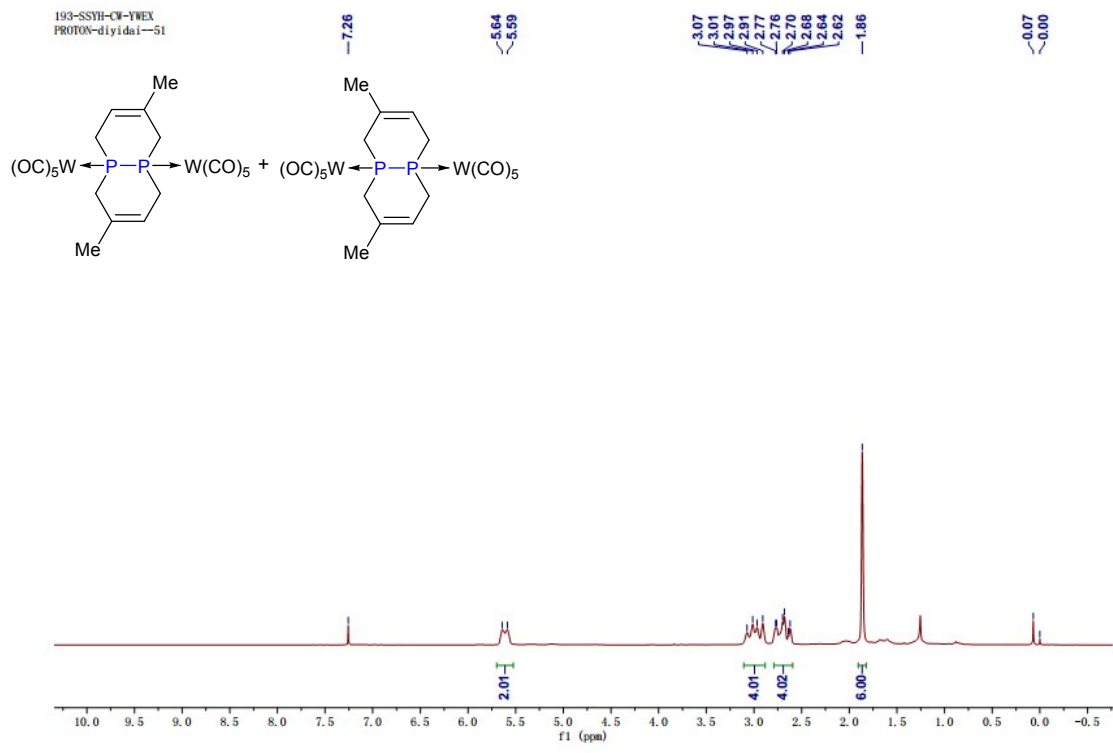

$^1H$  NMR of Compound 9 and 9'

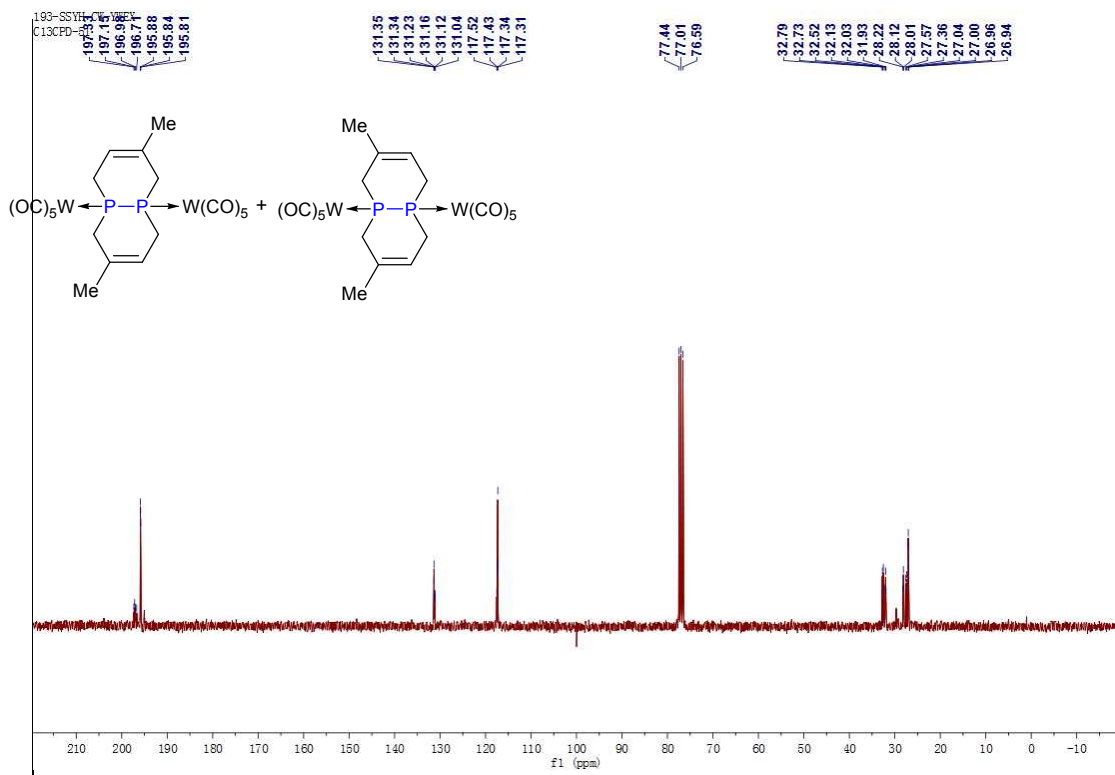

<sup>13</sup>C {<sup>1</sup>H} NMR of Compound **9** and **9'**

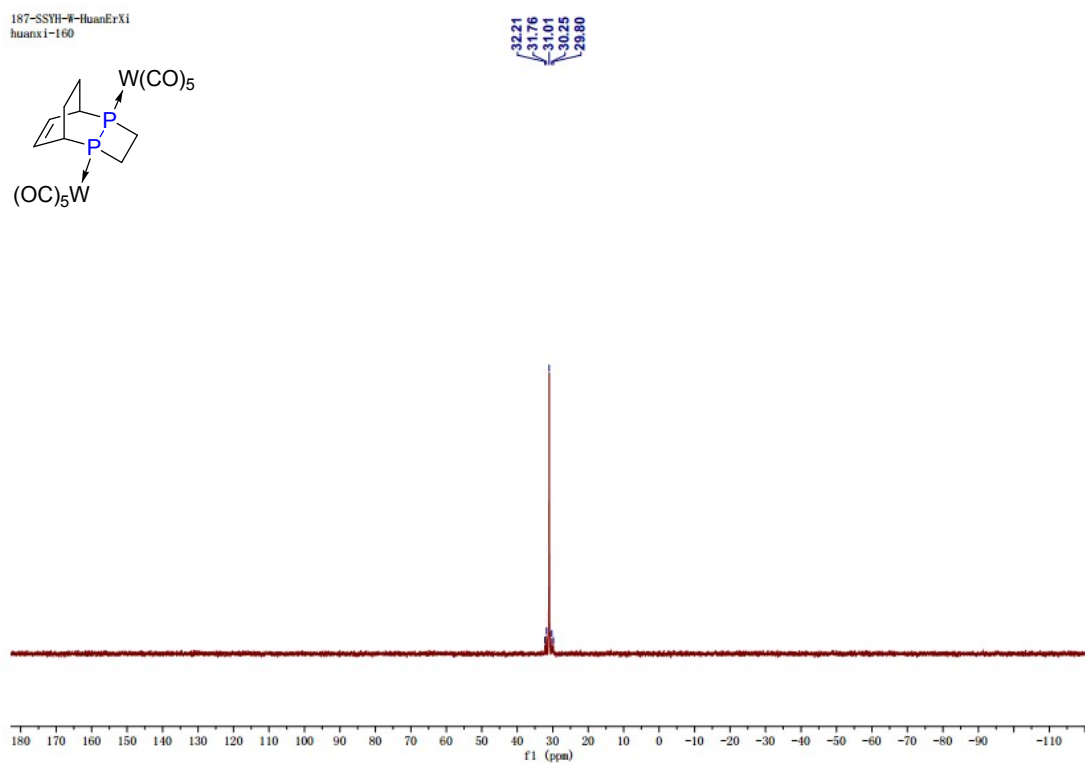

<sup>31</sup>P {<sup>1</sup>H} NMR of Compound **10**

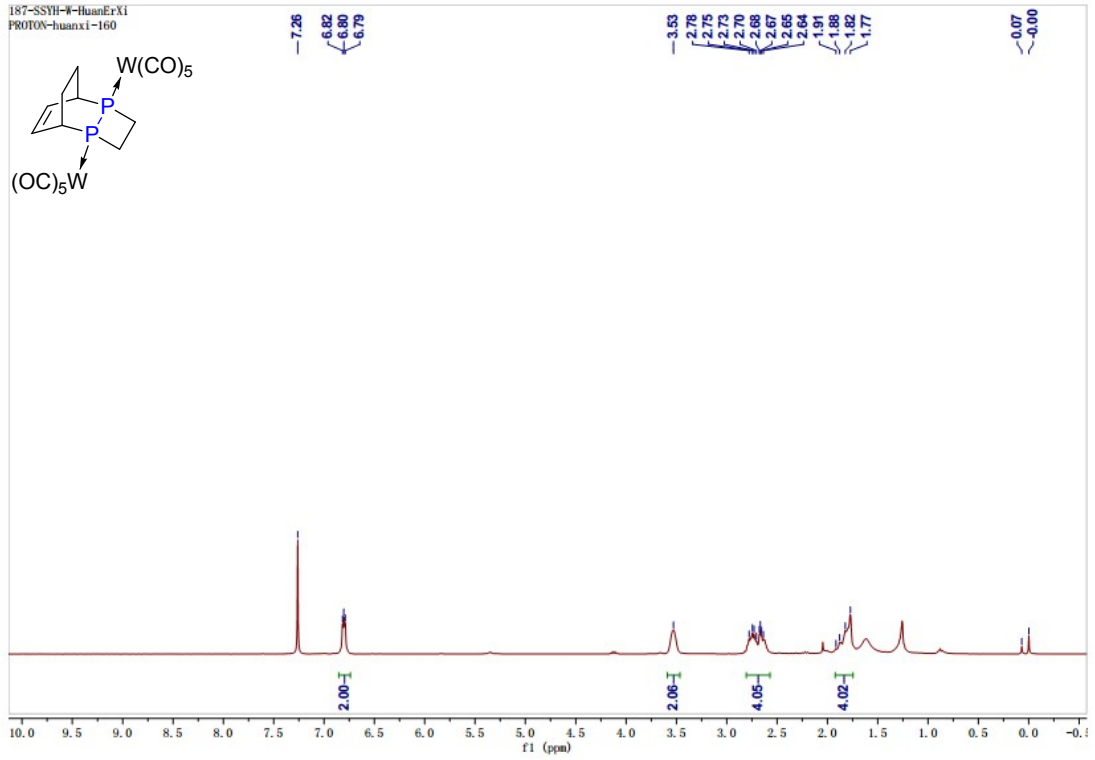

$^1\text{H}$  NMR of Compound 10

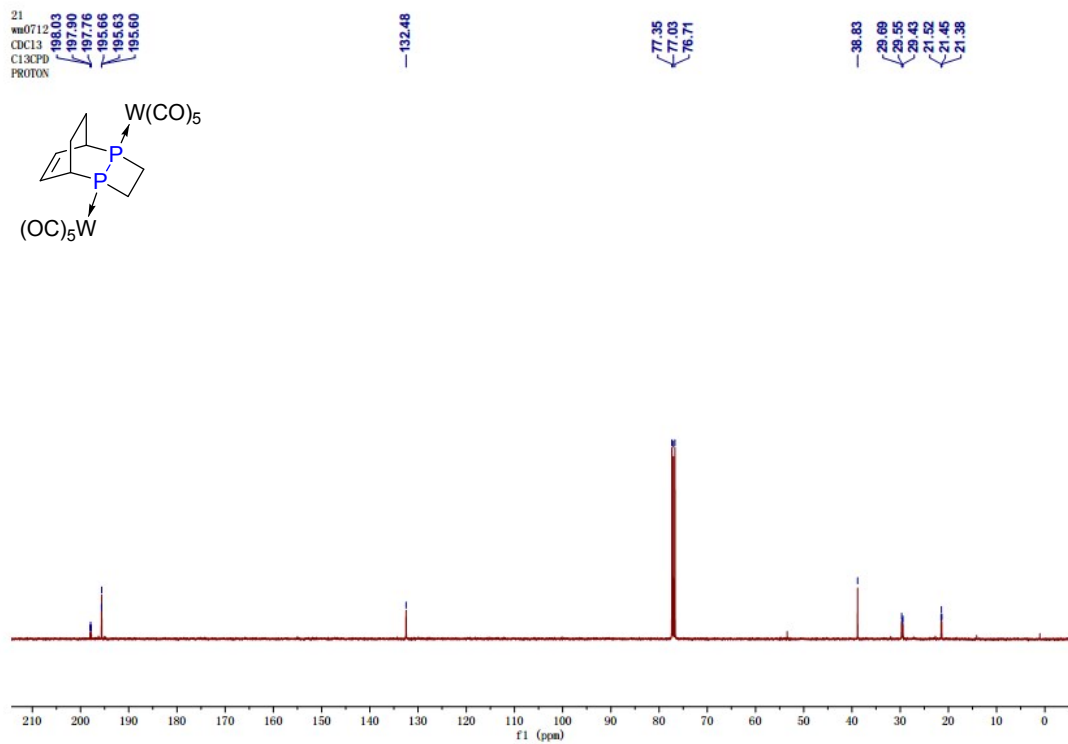

$^{13}\text{C}$   $\{^1\text{H}\}$  NMR of Compound 10

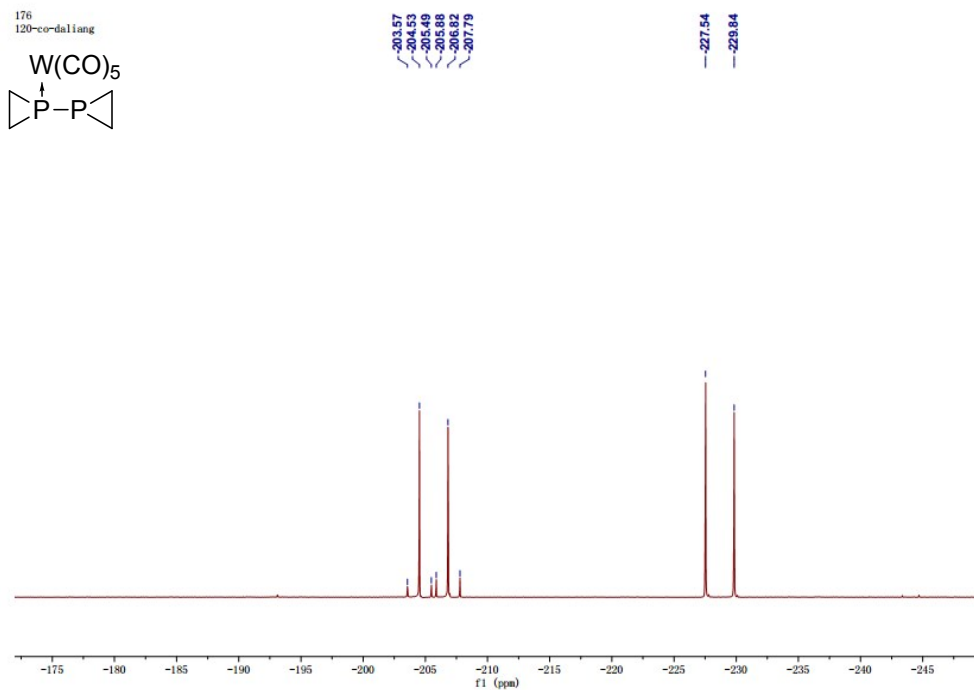

$^{31}\text{P} \{^1\text{H}\}$  NMR of Compound 11

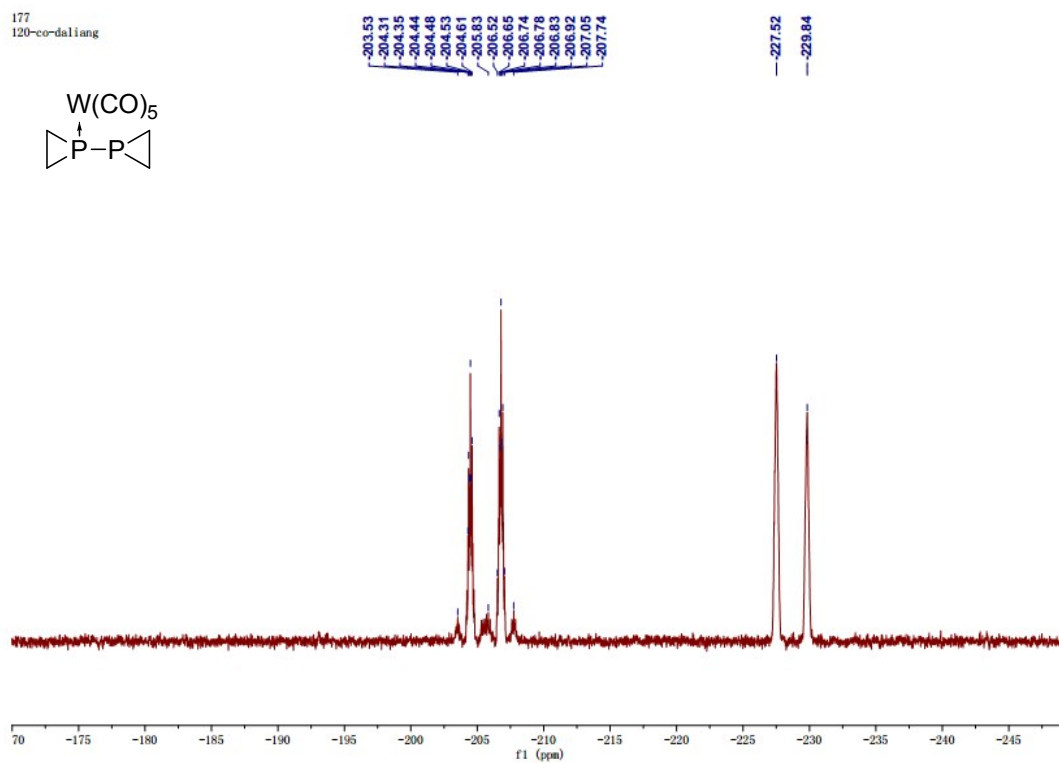

$^1\text{P}$  NMR of Compound 11

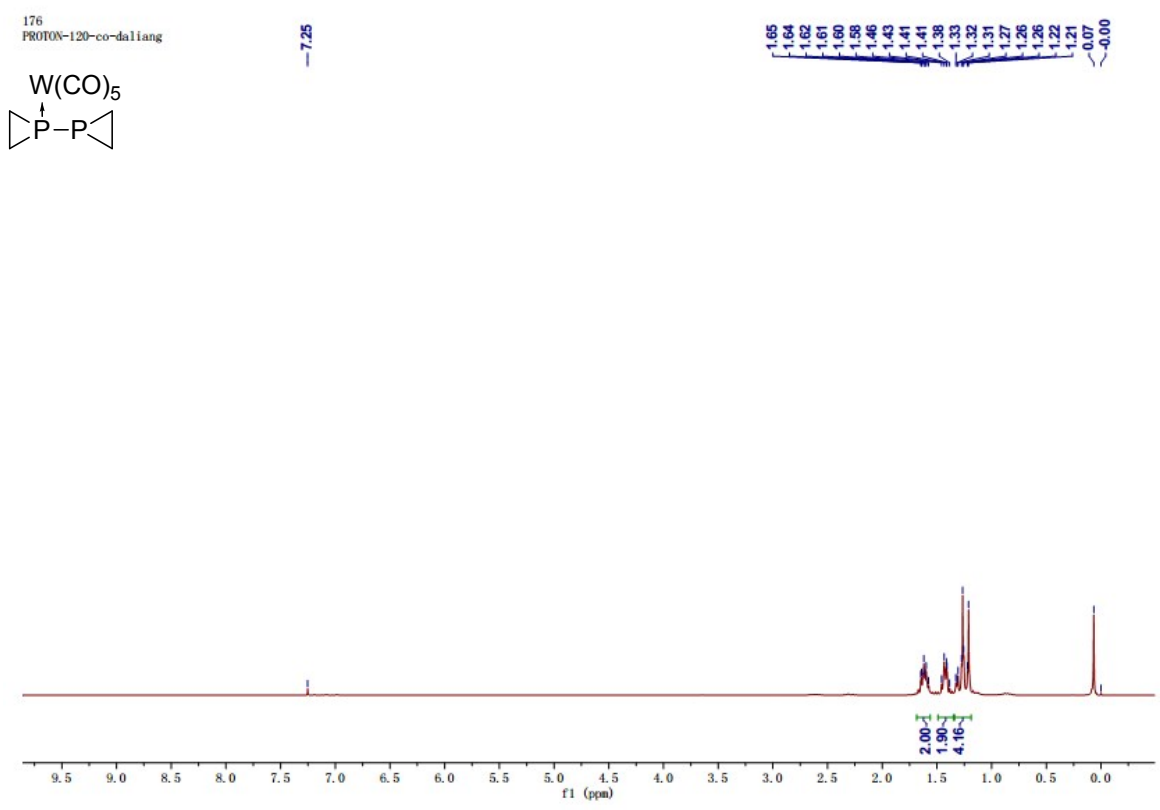

<sup>1</sup>H NMR of Compound **11**

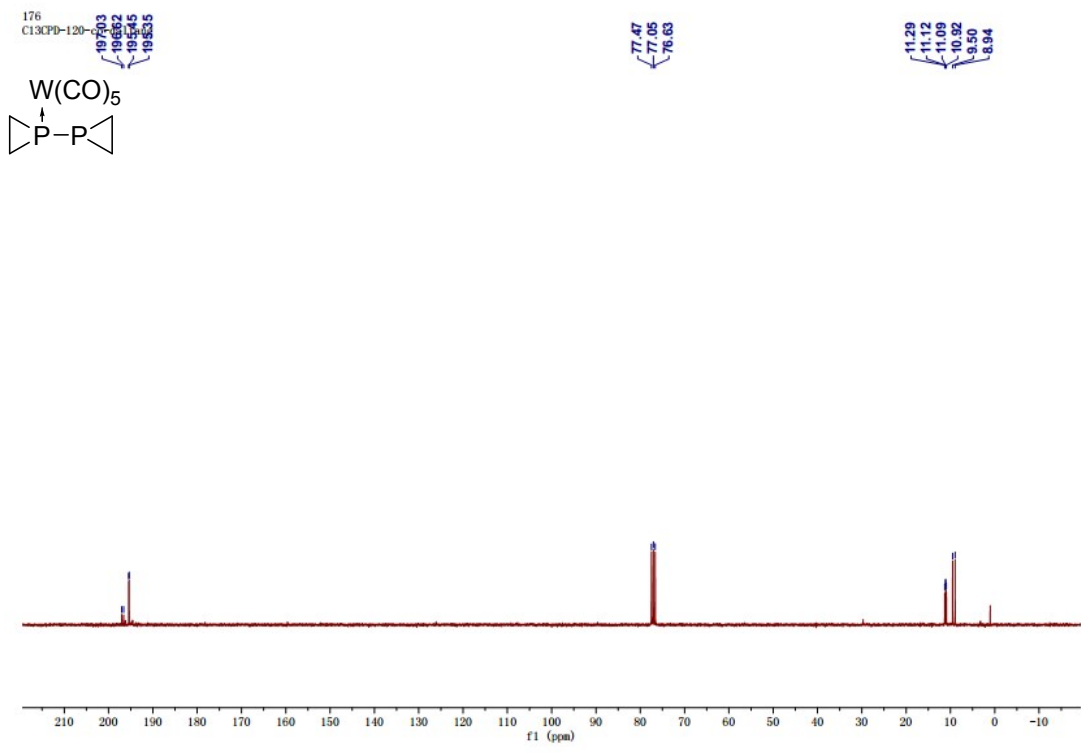

<sup>13</sup>C {<sup>1</sup>H} NMR of Compound **11**



148-SSVH-Mo-ya1inx1  
sanyuanhuan-mo-chun

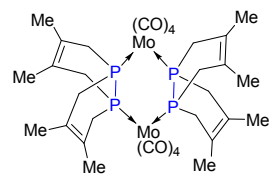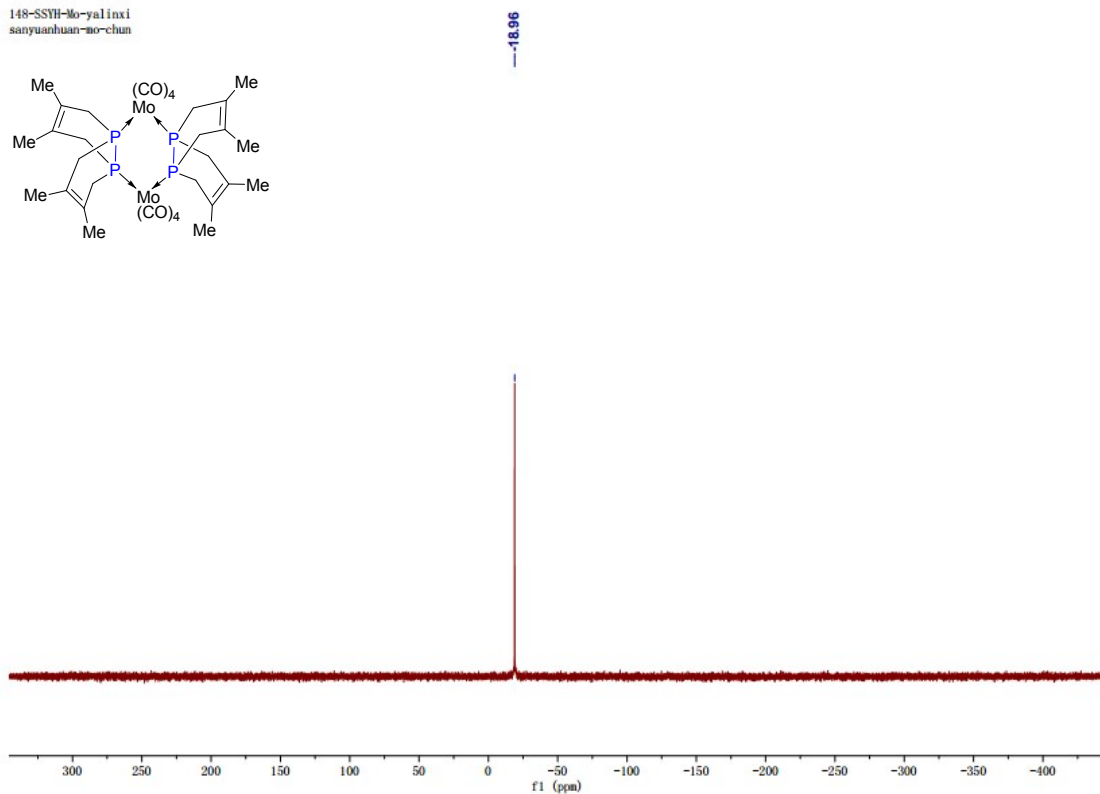

$^{31}\text{P} \{^1\text{H}\}$  NMR of Compound **12**

122-SSVH-CN-ERX1  
PROTON-20-2

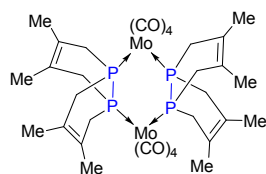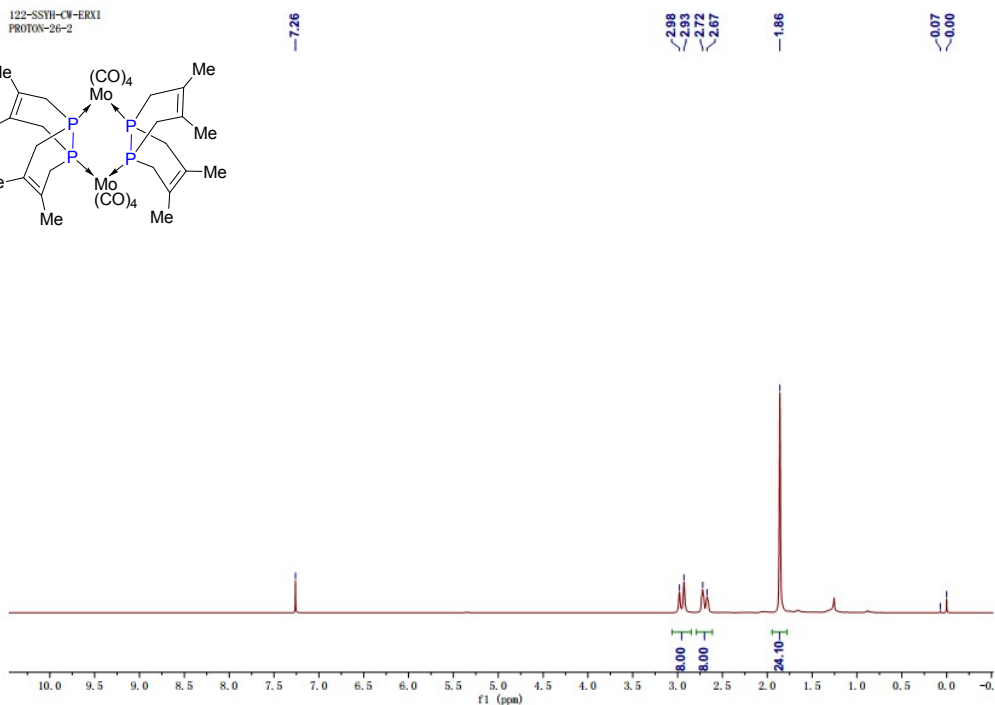

$^1\text{H}$  NMR of Compound **12**

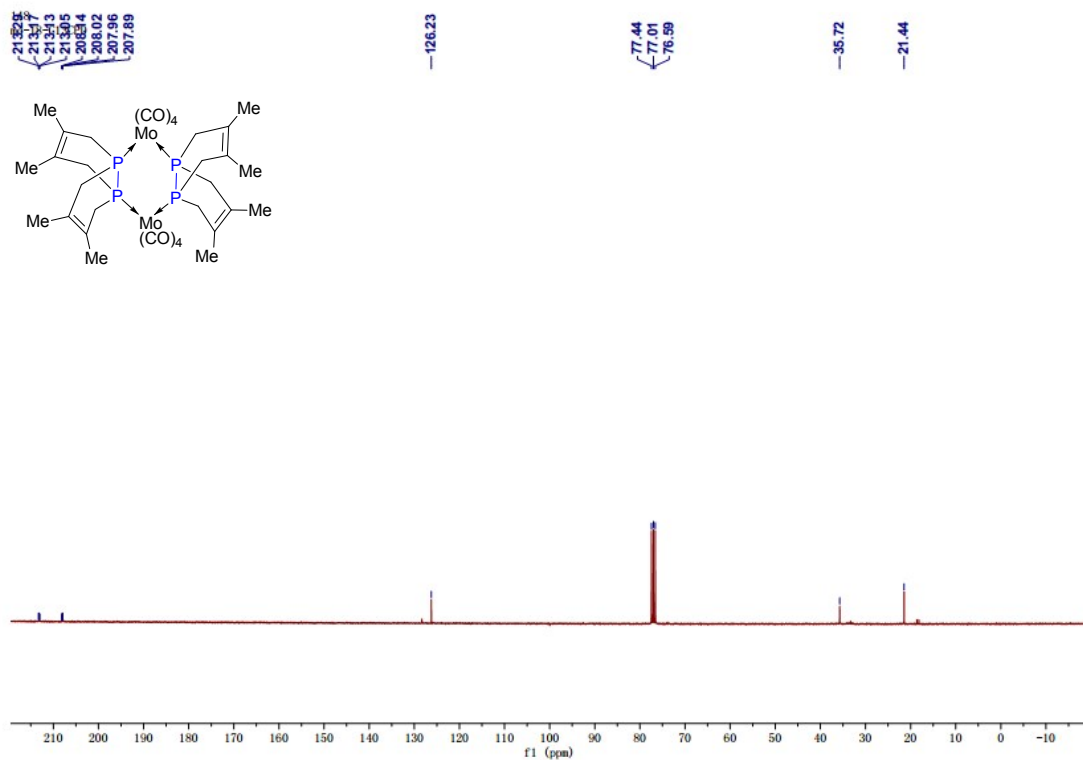

<sup>13</sup>C {<sup>1</sup>H} NMR of Compound 12

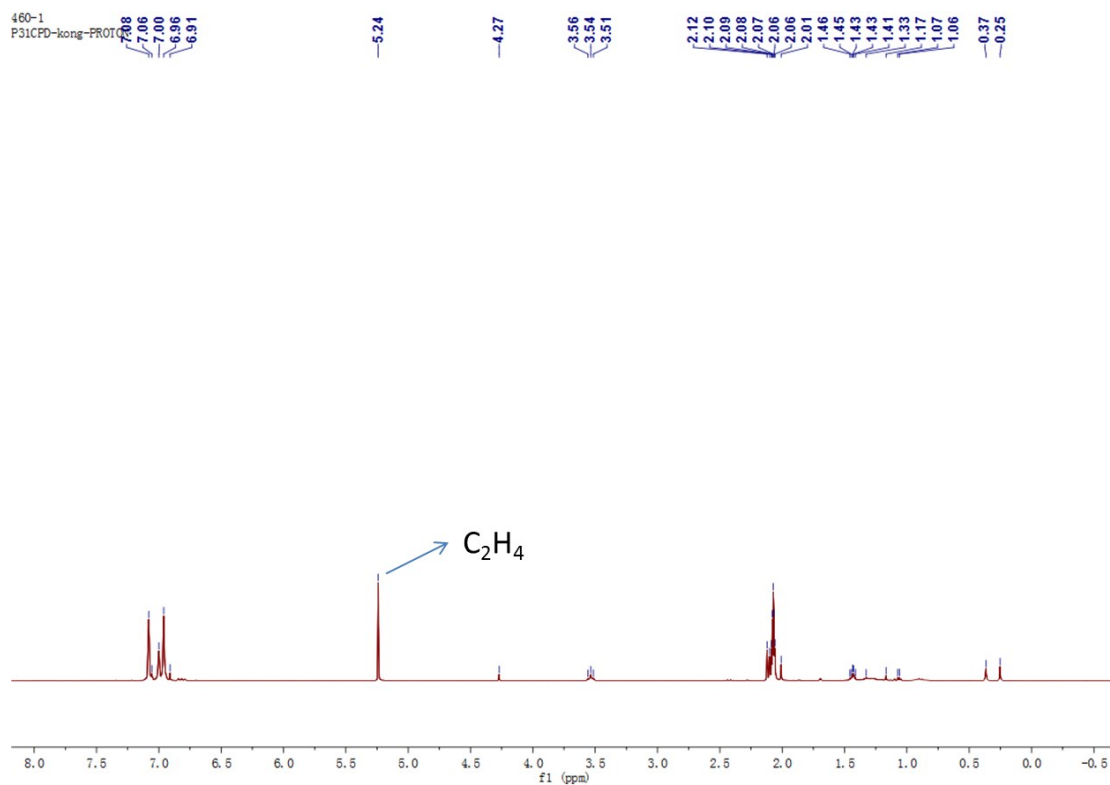

<sup>1</sup>H NMR of the thermolysis reaction of **1a** in toluene-d<sub>8</sub>
